# Supplementary material
Source: publisher site journal article supplement (https://www.dovepress.com/get_supplementary_file.php?f=248623.docx)
Supplement: Supplementary file 1 [file get_supplementary_file.php]

**Figure S1 Distribution of incidental gliomas in all grades of glioma.**

**Figure S1 Distribution of incidental gliomas in all grades of glioma.** With the increase of grade, the proportion of incidental glioma patients decreased obviously.

**Figure S2 Kaplan–Meier analysis of OS and PFS of iLGGs in different molecular subtypes and extent of resection.**


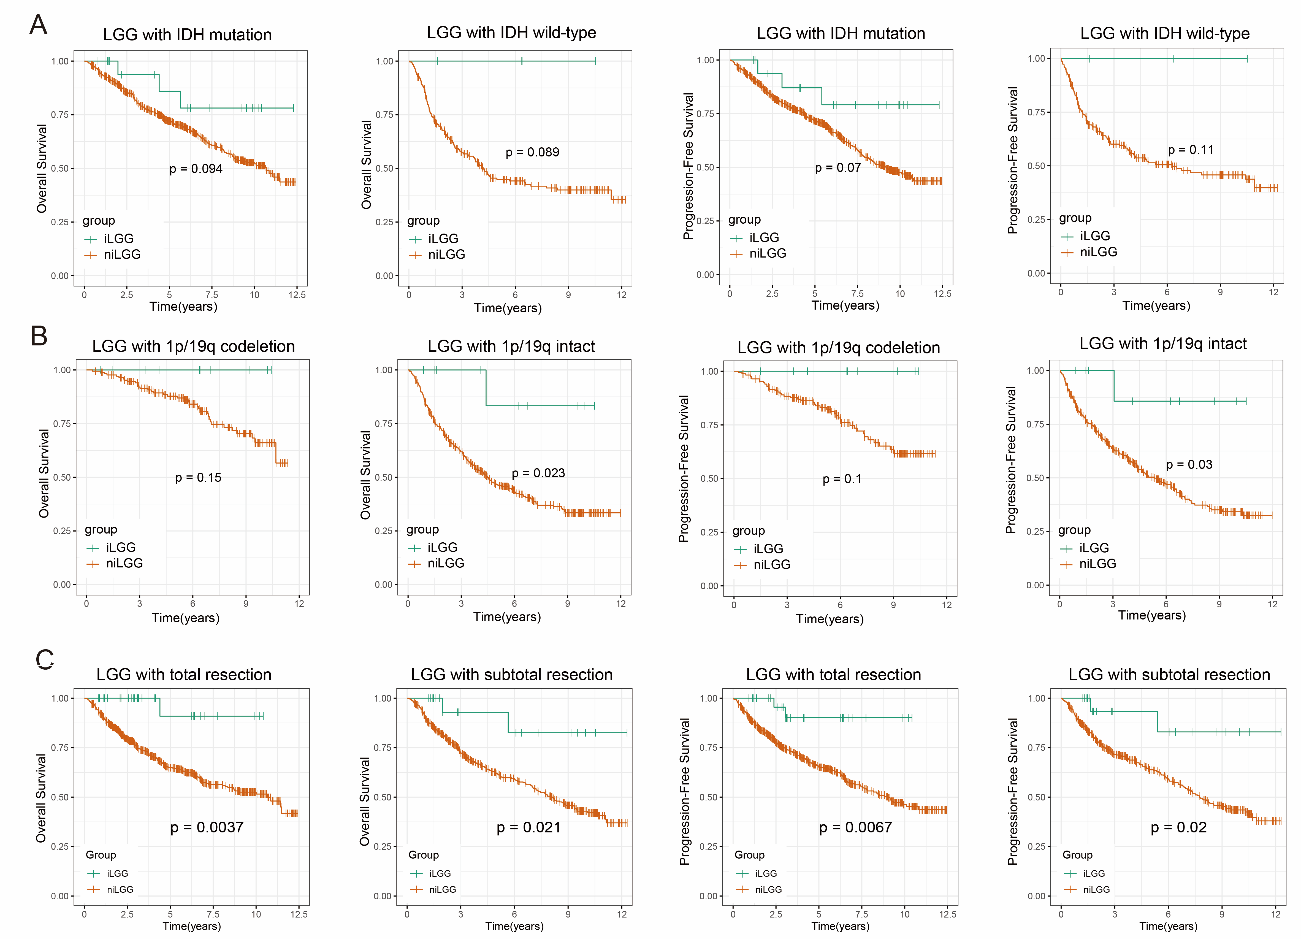


**Figure S2 Kaplan–Meier analysis of OS and PFS of iLGGs in different molecular subtypes and extent of resection.** IDH (A); 1p/19q (B); extent of resection (C).

**Figure S3 Enriched expression of GO terms related to mitochondrial aerobic respiration in iLGGs.**


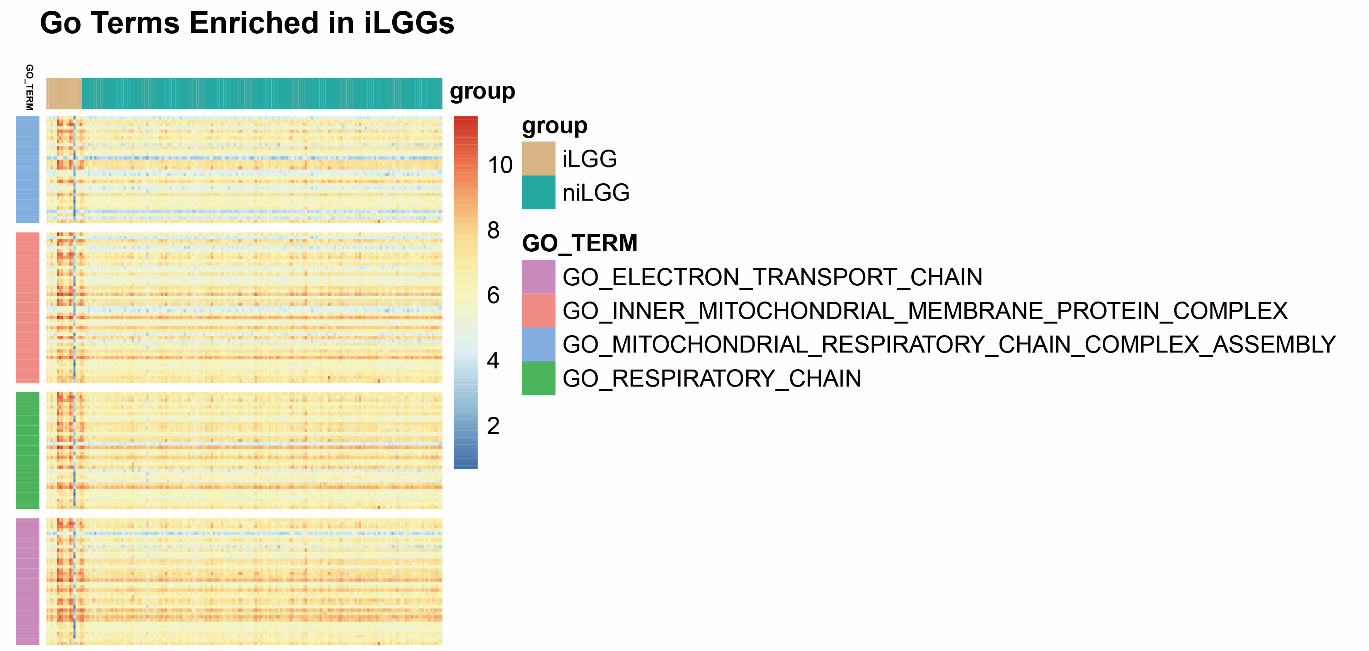


**Figure S3 Enriched expression of GO terms related to mitochondrial aerobic respiration in iLGGs.**

| **Table S1** Significantly up-regulated genes in iLGGs. | | | | |
| --- | --- | --- | --- | --- |
| **gene** | **nlog10Pvalue** | **Log2FC** | **FDR** | **nLog10FDR** |
| SIRT6 | 2.359364642 | 1.001370616 | 0.014865615 | 1.827817125 |
| INO80B | 2.498254491 | 1.00183318 | 0.011466029 | 1.940586961 |
| COX7C | 2.474173095 | 1.002298185 | 0.012005627 | 1.920615154 |
| ATP6V1H | 1.882614243 | 1.002471253 | 0.03506563 | 1.455118348 |
| PAGR1 | 2.307732861 | 1.004348767 | 0.016293021 | 1.787998373 |
| NUBP2 | 1.931182602 | 1.005179963 | 0.032185386 | 1.49234128 |
| TYK2 | 2.119696202 | 1.010654732 | 0.02295581 | 1.639107384 |
| FOXD4L3 | 1.895425472 | 1.011896066 | 0.034258738 | 1.46522864 |
| CENPT | 2.87697549 | 1.013606053 | 0.005678219 | 2.245787881 |
| MFI2-AS1 | 2.009443406 | 1.013760025 | 0.028050553 | 1.552058567 |
| NT5M | 2.198017214 | 1.014635979 | 0.019907353 | 1.700986472 |
| SSNA1 | 1.920942498 | 1.014908116 | 0.032794256 | 1.484202223 |
| C1orf132 | 2.481220246 | 1.018601293 | 0.011843619 | 1.926515563 |
| FLJ27365 | 2.689424768 | 1.018938657 | 0.008018914 | 2.095884435 |
| ZNF668 | 2.518718739 | 1.02007189 | 0.011026332 | 1.957568928 |
| EPS8L2 | 2.000806427 | 1.020174337 | 0.028506418 | 1.545057352 |
| SLC25A29 | 2.250341711 | 1.021853509 | 0.018065999 | 1.74313801 |
| AC004231.2 | 2.17764442 | 1.022154609 | 0.020655097 | 1.684972769 |
| ZNF580 | 1.774766287 | 1.022368605 | 0.042529008 | 1.371314751 |
| C16orf93 | 1.710032694 | 1.023012348 | 0.047649801 | 1.321938906 |
| DGCR6L | 1.748222593 | 1.025140402 | 0.044579449 | 1.350865299 |
| NR2F6 | 2.040137327 | 1.025562237 | 0.026524868 | 1.576346771 |
| BEX2 | 2.313850743 | 1.026140729 | 0.016129753 | 1.792372272 |
| ACYP1 | 1.867438759 | 1.02617436 | 0.036068394 | 1.442873195 |
| IFT27 | 1.985546133 | 1.026867905 | 0.029296798 | 1.533179844 |
| CC2D1A | 2.031009773 | 1.027477623 | 0.026964322 | 1.569210494 |
| ABHD16B | 1.851255033 | 1.028648144 | 0.037090267 | 1.430740036 |
| NKD2 | 2.344372952 | 1.03001623 | 0.0152539 | 1.816619112 |
| RP11-547D24.1 | 2.00062681 | 1.035055211 | 0.028513922 | 1.544943038 |
| LRFN1 | 1.946252273 | 1.036755003 | 0.031410287 | 1.502928098 |
| CAPN10 | 1.916632399 | 1.037377998 | 0.033052499 | 1.480795701 |
| CCDC124 | 1.932637701 | 1.037493406 | 0.032096299 | 1.493545048 |
| MT-RNR1 | 2.214079186 | 1.037719519 | 0.019341272 | 1.713514975 |
| TMEM256 | 1.775672823 | 1.03838145 | 0.042462971 | 1.371989626 |
| PPIAP22 | 2.522516083 | 1.042619317 | 0.010958004 | 1.960268527 |
| INTS1 | 2.052964666 | 1.043093255 | 0.025899681 | 1.586705586 |
| FAM73B | 3.428797194 | 1.045602024 | 0.002030351 | 2.692428862 |
| TRAPPC12 | 1.749662805 | 1.045893595 | 0.044461081 | 1.352019978 |
| MFSD3 | 1.789521203 | 1.047050255 | 0.04136758 | 1.383339885 |
| SLC25A28 | 2.485911682 | 1.049285098 | 0.011751882 | 1.929892581 |
| TRIM17 | 1.972964016 | 1.0540445 | 0.029947961 | 1.52363274 |
| JPH3 | 2.067526903 | 1.055705334 | 0.025240067 | 1.597909492 |
| NTNG2 | 3.754945397 | 1.059462279 | 0.001106748 | 2.955951154 |
| FAM211B | 2.405165064 | 1.059896992 | 0.013678986 | 1.863946087 |
| ZSWIM8 | 1.720321732 | 1.061583146 | 0.046774945 | 1.329986714 |
| C10orf95 | 2.161423408 | 1.066191764 | 0.021280891 | 1.672010195 |
| PFDN6 | 2.837962235 | 1.072936543 | 0.00610197 | 2.214529937 |
| ADD1 | 2.342115037 | 1.072937776 | 0.015314387 | 1.814900395 |
| GSDMB | 1.771573773 | 1.073493471 | 0.042797148 | 1.368585172 |
| CTGLF12P | 2.220966443 | 1.075162051 | 0.019100659 | 1.718951645 |
| PET100 | 1.946045355 | 1.078981531 | 0.031416073 | 1.502848109 |
| SGSM3 | 2.062151537 | 1.079738318 | 0.025483194 | 1.593746131 |
| RNASEK | 2.094290341 | 1.080273388 | 0.024033844 | 1.619176754 |
| VPS9D1 | 2.463299144 | 1.081122357 | 0.012252325 | 1.911781482 |
| COL18A1-AS1 | 1.717223271 | 1.081128492 | 0.047052669 | 1.327415737 |
| C20orf203 | 2.313590285 | 1.082007809 | 0.016136606 | 1.792187811 |
| CDK10 | 2.29020713 | 1.083984465 | 0.016808733 | 1.774465016 |
| PNKD | 2.081735161 | 1.085136877 | 0.024603392 | 1.609005013 |
| SRPK3 | 2.183525093 | 1.085364827 | 0.02045768 | 1.68914361 |
| RP1-293L6.1 | 1.827663251 | 1.085557112 | 0.038699344 | 1.412296401 |
| EBF4 | 1.876696957 | 1.086851588 | 0.035476687 | 1.450056938 |
| PPP1R12C | 1.693204027 | 1.087780909 | 0.049115304 | 1.308783163 |
| NAGK | 2.269057654 | 1.08840634 | 0.017466613 | 1.757791294 |
| ZNF428 | 1.806386238 | 1.089062209 | 0.040198186 | 1.395793549 |
| GUK1 | 1.685902467 | 1.090074881 | 0.049735184 | 1.303336269 |
| RP5-1112D6.4 | 1.750987998 | 1.091236521 | 0.044360634 | 1.353002255 |
| RP11-561C5.4 | 2.868856637 | 1.096340038 | 0.005761025 | 2.239500277 |
| ACHE | 1.870748297 | 1.096728723 | 0.035856382 | 1.445433532 |
| C19orf43 | 2.510729462 | 1.096860105 | 0.011183888 | 1.951407184 |
| AC069513.4 | 2.121061431 | 1.097506758 | 0.022906816 | 1.640035272 |
| BOLA2B | 1.696643984 | 1.098279833 | 0.048811464 | 1.311478162 |
| PRSS27 | 2.435526355 | 1.100271121 | 0.012916159 | 1.888866634 |
| FAM171A2 | 2.697373233 | 1.100289543 | 0.007907885 | 2.10193965 |
| TEX22 | 1.949995665 | 1.101524256 | 0.031177159 | 1.506163464 |
| RP11-451M19.3 | 2.303917841 | 1.103867945 | 0.016398148 | 1.785205206 |
| C6orf136 | 1.897989693 | 1.104105427 | 0.034095732 | 1.467299976 |
| FAM195B | 1.68886436 | 1.106988068 | 0.049469675 | 1.305660945 |
| GRIN2C | 2.743766247 | 1.107269486 | 0.007234236 | 2.140607348 |
| PDZD4 | 2.360526652 | 1.107938349 | 0.014841838 | 1.828512319 |
| RPS27 | 1.801775272 | 1.109917962 | 0.040521088 | 1.392318904 |
| EPN1 | 1.692393545 | 1.113005939 | 0.049175674 | 1.308249678 |
| KLHDC9 | 1.706455801 | 1.113137564 | 0.04796432 | 1.319081705 |
| TMUB1 | 1.828979823 | 1.116664124 | 0.038603362 | 1.41337487 |
| PRR14 | 1.811778859 | 1.12044135 | 0.039808246 | 1.400026955 |
| RP11-475C16.1 | 1.68524473 | 1.121517099 | 0.049758857 | 1.303129606 |
| LMF2 | 2.819017862 | 1.12397019 | 0.006302299 | 2.200500987 |
| MVD | 2.120836931 | 1.124463952 | 0.022915009 | 1.639879973 |
| CPSF3L | 2.08319916 | 1.12463644 | 0.024532102 | 1.61026524 |
| ANAPC2 | 2.193057772 | 1.12510142 | 0.020082851 | 1.697174629 |
| ZNF444 | 2.304866123 | 1.129413792 | 0.016378093 | 1.785736657 |
| TTC21A | 1.782743607 | 1.130445644 | 0.041911395 | 1.377667887 |
| BZRAP1 | 3.566377602 | 1.131583099 | 0.001569604 | 2.804209802 |
| SERP2 | 2.107525036 | 1.133831628 | 0.023448899 | 1.629877535 |
| TCAP | 2.119001065 | 1.134596202 | 0.022979616 | 1.638657234 |
| REEP6 | 2.053217466 | 1.135051498 | 0.025891595 | 1.586841201 |
| FAM207A | 1.729671778 | 1.140830366 | 0.046082678 | 1.336462287 |
| AGAP3 | 1.909955046 | 1.141217213 | 0.033406266 | 1.476172071 |
| SLC9A3R2 | 1.98446011 | 1.14234002 | 0.029352632 | 1.532352956 |
| PARP6 | 1.85465591 | 1.143517327 | 0.036857169 | 1.433478031 |
| GPX4 | 2.042200178 | 1.143774079 | 0.026423463 | 1.578010265 |
| GPR89C | 2.345277895 | 1.144727571 | 0.015227554 | 1.817369844 |
| POMT1 | 2.696898257 | 1.145826362 | 0.007913257 | 2.101644718 |
| DDX41 | 2.376006663 | 1.151031833 | 0.014412551 | 1.841259156 |
| NDUFA2 | 2.16185636 | 1.152944003 | 0.021266598 | 1.672301986 |
| DEAF1 | 1.939243657 | 1.156237803 | 0.031781961 | 1.497819308 |
| GTPBP6 | 1.829190975 | 1.157211271 | 0.038600473 | 1.413407375 |
| PPP1R37 | 2.079139571 | 1.158196384 | 0.024723813 | 1.606884541 |
| RPS6KL1 | 2.780229721 | 1.158466995 | 0.006776124 | 2.169018643 |
| THOP1 | 1.873862966 | 1.159683265 | 0.03566381 | 1.447772265 |
| PARD6A | 1.761036908 | 1.160410747 | 0.043563916 | 1.360873084 |
| SSBP4 | 2.033664779 | 1.161381797 | 0.026843603 | 1.5711592 |
| RP11-797H7.3 | 2.206289366 | 1.16459407 | 0.019612845 | 1.707459409 |
| EMC9 | 2.087453645 | 1.164603872 | 0.02433483 | 1.613771689 |
| TMEM88 | 2.308153888 | 1.165825266 | 0.016280069 | 1.788343745 |
| CASKIN1 | 2.351737732 | 1.166547623 | 0.015066938 | 1.821974995 |
| SEMA6C | 1.71887222 | 1.166699028 | 0.046900992 | 1.328817972 |
| ANKS3 | 2.199911998 | 1.167687738 | 0.01985352 | 1.702162479 |
| EPHA10 | 1.896206295 | 1.168866456 | 0.034216603 | 1.465763108 |
| C16orf86 | 1.982545002 | 1.169920104 | 0.029464778 | 1.530696834 |
| RPL31 | 1.798513307 | 1.170053416 | 0.040749473 | 1.389878004 |
| NDUFS5 | 1.832634907 | 1.173579092 | 0.038369261 | 1.416016569 |
| NOMO3 | 2.058373961 | 1.174966245 | 0.025666084 | 1.590640396 |
| C1orf35 | 3.093099564 | 1.17559984 | 0.003805408 | 2.419598805 |
| MAPK8IP2 | 1.983039093 | 1.176044607 | 0.029435664 | 1.531126167 |
| C1orf159 | 1.969856206 | 1.180632216 | 0.030113954 | 1.521232217 |
| AC012146.7 | 2.118922678 | 1.184858886 | 0.022979616 | 1.638657234 |
| RP3-525N10.2 | 2.76948306 | 1.18900715 | 0.006907262 | 2.160694043 |
| LRRC45 | 1.687232952 | 1.189799404 | 0.049624282 | 1.304305761 |
| ACBD4 | 2.215424128 | 1.190485351 | 0.019297555 | 1.714497718 |
| CCDC61 | 2.185555571 | 1.190733466 | 0.020389069 | 1.690602615 |
| RRP7B | 2.890174356 | 1.191403261 | 0.005548317 | 2.255838698 |
| H1FX | 2.182830808 | 1.191737322 | 0.020480905 | 1.688650862 |
| CTA-796E4.4 | 1.912550959 | 1.193128654 | 0.033254723 | 1.478146668 |
| GPT | 2.487144079 | 1.193982624 | 0.01172302 | 1.9309605 |
| TCEA2 | 2.398216671 | 1.194930039 | 0.013851419 | 1.858505734 |
| PWWP2B | 1.796268802 | 1.196300303 | 0.040905429 | 1.388219052 |
| RPL34 | 1.701477855 | 1.196536476 | 0.048404629 | 1.3151131 |
| CAMK2N2 | 1.79279016 | 1.198082249 | 0.041151223 | 1.385617252 |
| SMOX | 2.067408917 | 1.200290614 | 0.025243007 | 1.597858919 |
| FEZF2 | 2.068617233 | 1.20065033 | 0.02518851 | 1.598797518 |
| PTRH1 | 1.972239449 | 1.201487068 | 0.029984638 | 1.523101187 |
| PIGQ | 1.954844944 | 1.203295163 | 0.030898784 | 1.510058615 |
| RP11-261N11.8 | 2.631081949 | 1.203602656 | 0.008946579 | 2.048343012 |
| ASB13 | 1.877282802 | 1.207032872 | 0.035448804 | 1.450398407 |
| ATHL1 | 1.698126374 | 1.208394298 | 0.048704704 | 1.312429087 |
| TNK2 | 3.373882897 | 1.209224919 | 0.002246678 | 2.64845914 |
| KIAA1875 | 1.857828694 | 1.21030915 | 0.036665261 | 1.435745217 |
| AP3B2 | 1.829618761 | 1.211611979 | 0.038578041 | 1.413659826 |
| RP11-536C5.7 | 2.993585173 | 1.2131895 | 0.004589191 | 2.338263895 |
| NPEPL1 | 1.953680549 | 1.213349665 | 0.030954506 | 1.509276122 |
| NPIPB6 | 1.692901273 | 1.214019456 | 0.049130746 | 1.308646638 |
| PRSS53 | 2.438209398 | 1.214047533 | 0.012854326 | 1.890950676 |
| SURF2 | 1.720011707 | 1.215936093 | 0.046796244 | 1.329789005 |
| OXLD1 | 1.947167712 | 1.216349179 | 0.031362479 | 1.503589616 |
| CLK1 | 1.913090236 | 1.216752896 | 0.033224754 | 1.478538228 |
| PRR7 | 2.084312219 | 1.218670492 | 0.02448463 | 1.611106449 |
| ACAP3 | 2.364528878 | 1.218938698 | 0.014726808 | 1.831891377 |
| PLGLB1 | 2.108228869 | 1.222395335 | 0.02342575 | 1.630306498 |
| SNX32 | 1.872892142 | 1.223747563 | 0.035728087 | 1.446990239 |
| KANK3 | 2.566061992 | 1.223979183 | 0.010114365 | 1.995061394 |
| UBXN6 | 1.941186404 | 1.224663103 | 0.03169529 | 1.499005267 |
| GNB1L | 2.034744058 | 1.224783755 | 0.026786563 | 1.572083 |
| PRR5 | 1.733503568 | 1.228193052 | 0.045767266 | 1.33944503 |
| STRA13 | 2.648824801 | 1.229288127 | 0.008663482 | 2.062307525 |
| TM7SF2 | 2.123178347 | 1.234642144 | 0.022828181 | 1.641528695 |
| CAPN15 | 2.220540172 | 1.23498495 | 0.019109826 | 1.718743268 |
| RPS29 | 1.842960613 | 1.235262293 | 0.037668322 | 1.424023726 |
| WDR83 | 1.789191054 | 1.237006038 | 0.041393486 | 1.383068001 |
| STK32C | 1.77856667 | 1.237032208 | 0.042247747 | 1.374196445 |
| ATAD3B | 2.255440102 | 1.237780247 | 0.017891501 | 1.747353213 |
| ECI1 | 2.175719055 | 1.238388315 | 0.020723123 | 1.683544793 |
| TXNL4A | 1.90844982 | 1.242986475 | 0.033493522 | 1.475039184 |
| NDUFB8 | 2.012728094 | 1.243528883 | 0.027893934 | 1.554490229 |
| LRRC56 | 1.775516562 | 1.245174852 | 0.042472586 | 1.371891294 |
| C1orf233 | 1.7863927 | 1.252926099 | 0.041621981 | 1.380677254 |
| PRDX5 | 2.19665415 | 1.253130133 | 0.01996333 | 1.699767018 |
| DMPK | 1.707223249 | 1.255497248 | 0.047903568 | 1.319632138 |
| SUV420H2 | 2.335060121 | 1.256000465 | 0.015499249 | 1.809689349 |
| ENO1-AS1 | 2.050193024 | 1.258091311 | 0.026021403 | 1.58466929 |
| ZNF771 | 1.811252786 | 1.258513335 | 0.039845668 | 1.399618893 |
| MST1 | 2.376263275 | 1.258906444 | 0.014406636 | 1.841437406 |
| SGSM2 | 2.77737838 | 1.261481021 | 0.006811967 | 2.166727444 |
| PODXL2 | 1.994678867 | 1.263121758 | 0.028830742 | 1.540144185 |
| C7orf50 | 1.911308589 | 1.266897475 | 0.033330903 | 1.477152921 |
| DMRTC1 | 1.987722752 | 1.269145757 | 0.029167742 | 1.535097185 |
| CDH22 | 1.710409164 | 1.270089625 | 0.04761464 | 1.322259492 |
| CLTB | 1.90217807 | 1.272162319 | 0.033841407 | 1.470551587 |
| KIAA0930 | 2.004002243 | 1.272362924 | 0.028340034 | 1.547599633 |
| GLTPD2 | 3.110988546 | 1.2762436 | 0.003686514 | 2.433384136 |
| RPL3P4 | 1.972241309 | 1.278993884 | 0.029984638 | 1.523101187 |
| YPEL3 | 2.229888812 | 1.285650871 | 0.018780263 | 1.726298324 |
| UBALD1 | 2.27852882 | 1.290592021 | 0.017163146 | 1.765403111 |
| COX4I1 | 1.749900108 | 1.291822019 | 0.044442642 | 1.352200134 |
| CDC34 | 1.860519 | 1.292905729 | 0.036509288 | 1.437596633 |
| ASIC3 | 2.229861846 | 1.29428111 | 0.018780263 | 1.726298324 |
| TOB1-AS1 | 3.529380852 | 1.29451272 | 0.001682534 | 2.774036132 |
| LSM7 | 1.756784387 | 1.296409602 | 0.043899644 | 1.357538998 |
| ECSIT | 1.827470843 | 1.297467901 | 0.038711189 | 1.412163491 |
| RP11-465L10.10 | 1.964143701 | 1.29996373 | 0.030409213 | 1.516994817 |
| DUS1L | 2.484357682 | 1.301772332 | 0.011782847 | 1.928749772 |
| C12orf10 | 2.002568035 | 1.301840475 | 0.028412384 | 1.546492331 |
| FAM98C | 2.331397652 | 1.312598542 | 0.01561122 | 1.806563163 |
| HYI | 1.939794258 | 1.312685229 | 0.031760179 | 1.498117063 |
| MFSD7 | 1.730500277 | 1.315155727 | 0.046024814 | 1.337007954 |
| RASGRP2 | 2.31258245 | 1.317503767 | 0.016157141 | 1.79163548 |
| RP11-358D14.2 | 2.471589789 | 1.319211325 | 0.012063618 | 1.918522411 |
| RP11-278H7.1 | 2.12855112 | 1.320714747 | 0.022624557 | 1.645419919 |
| EFCAB4A | 1.858297919 | 1.321198303 | 0.036640083 | 1.436043547 |
| NRSN2 | 1.994654182 | 1.322727403 | 0.028830742 | 1.540144185 |
| ACADVL | 2.25180628 | 1.324818221 | 0.018020431 | 1.744234815 |
| UQCRQ | 1.883741732 | 1.3269408 | 0.034988005 | 1.456080825 |
| LAT | 1.804047437 | 1.329332503 | 0.040362463 | 1.394022336 |
| MBLAC1 | 1.858076004 | 1.334283938 | 0.03664949 | 1.435932062 |
| NDUFB2 | 2.193360242 | 1.334387755 | 0.020078803 | 1.697262179 |
| POLN | 1.723995625 | 1.335714595 | 0.046513288 | 1.332422962 |
| RPS9 | 1.691943064 | 1.338365701 | 0.049195343 | 1.308076009 |
| ATPIF1 | 1.992034119 | 1.342509204 | 0.028956865 | 1.538248453 |
| NPDC1 | 1.906223924 | 1.343963354 | 0.033641601 | 1.473123345 |
| SKIV2L | 2.007268004 | 1.347086328 | 0.028170152 | 1.550210812 |
| Z83851.1 | 1.935056578 | 1.347461485 | 0.031987467 | 1.495020153 |
| FSD1 | 2.323149992 | 1.347851769 | 0.015849051 | 1.799996742 |
| TCEB2 | 1.724238217 | 1.34869145 | 0.046499617 | 1.332550628 |
| OGFR | 2.314607489 | 1.350927897 | 0.016110129 | 1.792900972 |
| NYAP1 | 1.716296081 | 1.355306656 | 0.047101111 | 1.32696885 |
| AC105339.1 | 2.019284045 | 1.355762724 | 0.027551021 | 1.559862302 |
| WASH3P | 2.12225007 | 1.361073635 | 0.022873376 | 1.640669739 |
| CCDC101 | 1.977096338 | 1.362034762 | 0.029740019 | 1.526658757 |
| NDUFS6 | 1.777951274 | 1.36398944 | 0.042288299 | 1.373779786 |
| DRAP1 | 2.520465526 | 1.366412393 | 0.010992607 | 1.958899279 |
| FAM228B | 1.816383809 | 1.369203232 | 0.039495718 | 1.403449985 |
| TMEM86B | 1.922353956 | 1.370201265 | 0.032713887 | 1.485267852 |
| ZFR2 | 1.745650796 | 1.370723588 | 0.044785348 | 1.34886405 |
| SPTBN4 | 2.06816123 | 1.372173096 | 0.025211056 | 1.59840897 |
| C16orf74 | 1.82769603 | 1.372617765 | 0.038699344 | 1.412296401 |
| GOLGA7B | 1.913066884 | 1.372907047 | 0.033224754 | 1.478538228 |
| C17orf50 | 2.744322249 | 1.376582831 | 0.007226506 | 2.141071624 |
| CTRL | 1.839818994 | 1.378615205 | 0.037865227 | 1.421759431 |
| CTNNBL1 | 1.995514382 | 1.380557445 | 0.028786641 | 1.540809007 |
| HDAC10 | 3.159135374 | 1.381291832 | 0.003355963 | 2.474182787 |
| RAPGEF3 | 2.00489549 | 1.382818207 | 0.028294589 | 1.548296611 |
| SYCE3 | 1.859132414 | 1.385692646 | 0.036585908 | 1.436686157 |
| UBL5 | 2.681232617 | 1.387808518 | 0.008128334 | 2.089998453 |
| NDUFS7 | 1.82021722 | 1.392840581 | 0.039232148 | 1.40635791 |
| C19orf26 | 2.116087347 | 1.395689209 | 0.023082626 | 1.636714787 |
| ADIRF | 1.792020894 | 1.395926645 | 0.041207558 | 1.385023126 |
| GAK | 2.126500366 | 1.398128395 | 0.022697703 | 1.644018096 |
| TMEM132A | 1.778517311 | 1.398923845 | 0.042247747 | 1.374196445 |
| ANKRD13D | 2.04487819 | 1.402864354 | 0.026281174 | 1.58035523 |
| ANAPC11 | 1.870148439 | 1.404043192 | 0.035894531 | 1.444971713 |
| RP11-62H7.2 | 1.997381662 | 1.404328376 | 0.02869327 | 1.542219957 |
| VTN | 2.700544523 | 1.405164388 | 0.007862802 | 2.104422638 |
| RGS12 | 2.453688957 | 1.4052794 | 0.012498352 | 1.903147234 |
| PPP1R35 | 2.622625122 | 1.407157421 | 0.009087872 | 2.041537794 |
| RABAC1 | 1.813517934 | 1.407683116 | 0.039691591 | 1.401301495 |
| AURKAIP1 | 1.795302949 | 1.408247651 | 0.040972395 | 1.387508647 |
| AC062021.1 | 2.006895787 | 1.409928223 | 0.028181314 | 1.550038764 |
| RPS15 | 1.956078909 | 1.410042629 | 0.030847299 | 1.51078286 |
| KLHL35 | 2.161126 | 1.411183612 | 0.021288551 | 1.671853895 |
| NEIL1 | 2.928032559 | 1.414737739 | 0.005177862 | 2.285849499 |
| TRAPPC6A | 1.834873994 | 1.417054151 | 0.038208704 | 1.417837695 |
| RPL35 | 1.691730957 | 1.417403955 | 0.049206832 | 1.307974592 |
| SNRNP70 | 2.142421209 | 1.422973194 | 0.022028653 | 1.65701206 |
| B3GNTL1 | 1.961024435 | 1.427142885 | 0.030587824 | 1.514451418 |
| HSD11B1L | 2.05438925 | 1.428616151 | 0.02584077 | 1.58769455 |
| AC113189.5 | 2.538166285 | 1.433986208 | 0.01065168 | 1.972581884 |
| SLC12A5 | 2.176756848 | 1.439292686 | 0.020690578 | 1.684227378 |
| GUSBP11 | 2.473044348 | 1.44252364 | 0.012027809 | 1.919813473 |
| CR769776.1 | 1.943674745 | 1.442527243 | 0.031546549 | 1.501048145 |
| FAM89B | 2.669532128 | 1.44431848 | 0.008312464 | 2.080270202 |
| NDUFB1 | 2.59552599 | 1.447006388 | 0.009588172 | 2.018264191 |
| TRPV1 | 2.450902161 | 1.447009625 | 0.012548297 | 1.901415216 |
| ATP5I | 2.14522172 | 1.450163782 | 0.021925893 | 1.659042703 |
| C16orf13 | 1.935773383 | 1.450677258 | 0.031959925 | 1.495394248 |
| FKBP8 | 2.010231263 | 1.453223947 | 0.028012397 | 1.552649728 |
| HSD17B14 | 2.434173824 | 1.455906591 | 0.01294445 | 1.887916404 |
| MEIS3 | 2.39385268 | 1.456526244 | 0.013960738 | 1.85509162 |
| JAG2 | 1.800229569 | 1.463401396 | 0.040638098 | 1.391066627 |
| KIAA1984 | 2.055184054 | 1.463804358 | 0.025803442 | 1.588322361 |
| TMEM121 | 2.229721375 | 1.464867957 | 0.018782304 | 1.726251138 |
| DUSP8P3 | 2.70885069 | 1.466437278 | 0.007735327 | 2.11152133 |
| AK1 | 2.046282137 | 1.470044286 | 0.026210514 | 1.581524462 |
| SH2B2 | 1.800244684 | 1.47600081 | 0.040638098 | 1.391066627 |
| ADM5 | 2.093176381 | 1.479132543 | 0.024080427 | 1.618335825 |
| PLA2G10 | 1.915002063 | 1.482696967 | 0.033114974 | 1.479975582 |
| PSD | 1.697487271 | 1.485323918 | 0.048757712 | 1.311956683 |
| CHRD | 2.427762122 | 1.485770498 | 0.013105417 | 1.882549157 |
| NSUN5P1 | 2.18168322 | 1.486370165 | 0.020514281 | 1.687943707 |
| ZFPM1 | 1.922369791 | 1.488824625 | 0.032713887 | 1.485267852 |
| CPSF1 | 2.018913508 | 1.490209733 | 0.027570357 | 1.559557616 |
| AC090186.1 | 1.807304097 | 1.493231896 | 0.040138716 | 1.396436521 |
| CBWD7 | 2.460618925 | 1.493514821 | 0.01231663 | 1.909508092 |
| LINC01063 | 1.723212211 | 1.493659577 | 0.046562702 | 1.331961822 |
| APOE | 1.725227724 | 1.499022316 | 0.046429696 | 1.333204157 |
| ADCK5 | 2.029824182 | 1.499160032 | 0.027021552 | 1.568289703 |
| RP11-445H22.3 | 1.736578822 | 1.501640966 | 0.045509643 | 1.341896569 |
| CTD-3184A7.4 | 1.774619892 | 1.501952881 | 0.042537675 | 1.371226251 |
| BAI1 | 1.777926657 | 1.503237338 | 0.042288299 | 1.373779786 |
| RP11-143M1.3 | 1.752886303 | 1.50371902 | 0.044207895 | 1.35450016 |
| LINC00116 | 2.013004824 | 1.503748926 | 0.027888819 | 1.554569869 |
| RGS11 | 2.248371378 | 1.503838968 | 0.018126669 | 1.741681987 |
| LINC00173 | 2.006834019 | 1.506481944 | 0.028181314 | 1.550038764 |
| DCXR | 2.081377808 | 1.511496141 | 0.024619796 | 1.608715543 |
| PAM16 | 2.224099404 | 1.51373838 | 0.018988511 | 1.721509095 |
| SCRIB | 2.065871606 | 1.514291106 | 0.025312872 | 1.596658583 |
| ARFGAP1 | 2.611496447 | 1.514804455 | 0.009288178 | 2.032069484 |
| RP11-112J3.16 | 1.839462242 | 1.516029012 | 0.037885328 | 1.421528949 |
| TFAP2E | 2.354715647 | 1.516968741 | 0.01499071 | 1.824177799 |
| ENDOG | 2.34613141 | 1.518253666 | 0.015211161 | 1.817837639 |
| C17orf89 | 2.144236804 | 1.522593217 | 0.021968587 | 1.658197872 |
| KPTN | 1.818438209 | 1.522947259 | 0.039346855 | 1.405089978 |
| PHPT1 | 1.689210227 | 1.523663315 | 0.049436584 | 1.305951542 |
| DNPH1 | 2.940696792 | 1.524313944 | 0.005055917 | 2.296200106 |
| WDR86 | 2.678709562 | 1.524800981 | 0.008163689 | 2.088113559 |
| CPT1C | 2.197124959 | 1.525361696 | 0.019944998 | 1.700166009 |
| NOXA1 | 2.368348312 | 1.527338541 | 0.014626743 | 1.834852356 |
| TBC1D3 | 1.855751647 | 1.528674465 | 0.036779617 | 1.434392792 |
| CTB-63M22.1 | 1.692606815 | 1.538770586 | 0.049157799 | 1.308407567 |
| SRRM3 | 1.941061967 | 1.538782402 | 0.03169529 | 1.499005267 |
| SRRM2 | 1.955999918 | 1.542727468 | 0.030848383 | 1.510767603 |
| SAFB2 | 2.342759579 | 1.547030002 | 0.015297866 | 1.815369156 |
| TXNRD2 | 1.876563897 | 1.549967122 | 0.03548257 | 1.449984927 |
| SCNN1D | 2.625549945 | 1.551961013 | 0.009040211 | 2.043821429 |
| ABHD17A | 2.441519362 | 1.554476106 | 0.012779426 | 1.893488649 |
| SLC2A4RG | 2.057411982 | 1.557795758 | 0.025711074 | 1.589879775 |
| AC013460.1 | 1.722983276 | 1.558928666 | 0.046578595 | 1.331813616 |
| POLR2I | 1.856237769 | 1.559654678 | 0.036748683 | 1.434758216 |
| RP11-385F5.4 | 2.11080006 | 1.560410478 | 0.023320683 | 1.632258732 |
| ACTL6B | 1.823773778 | 1.561061821 | 0.038978052 | 1.409179865 |
| CRIP2 | 1.863447515 | 1.566083955 | 0.036315236 | 1.439911124 |
| C19orf73 | 2.636035152 | 1.568067048 | 0.008864766 | 2.052332714 |
| C1orf122 | 1.713830201 | 1.574600493 | 0.047326316 | 1.324897304 |
| LINC00634 | 2.363645127 | 1.580082036 | 0.01474622 | 1.831319291 |
| RNF31 | 2.283238669 | 1.584995363 | 0.017024767 | 1.768918813 |
| AP1G2 | 2.173374815 | 1.585566055 | 0.020808061 | 1.681768393 |
| AZI1 | 1.766356615 | 1.589182411 | 0.043170639 | 1.364811527 |
| MTA1 | 1.955432094 | 1.589400444 | 0.030870617 | 1.51045469 |
| IFI27L2 | 1.893285762 | 1.59570427 | 0.034388936 | 1.463581258 |
| QTRT1 | 1.977425853 | 1.608159808 | 0.029729959 | 1.526805684 |
| LAGE3 | 2.138360308 | 1.60911964 | 0.022182031 | 1.653998699 |
| NRN1L | 2.403052578 | 1.610519574 | 0.013730605 | 1.862310336 |
| HRAS | 1.692012912 | 1.617781347 | 0.0491937 | 1.308090512 |
| TRAPPC5 | 2.178941901 | 1.618841769 | 0.020620489 | 1.685701034 |
| FAM132A | 1.841189494 | 1.619449613 | 0.037776608 | 1.422777041 |
| USMG5 | 3.338612918 | 1.628143962 | 0.002405741 | 2.618751171 |
| HSF4 | 2.761769398 | 1.630252782 | 0.00699662 | 2.155111734 |
| NAPRT1 | 2.010004939 | 1.633362832 | 0.028018536 | 1.552554564 |
| PIDD | 1.967693384 | 1.635799211 | 0.030224061 | 1.519647187 |
| NTN5 | 2.101495011 | 1.635803952 | 0.023716736 | 1.624945088 |
| TMEM191C | 1.790024095 | 1.644035578 | 0.041339505 | 1.38363473 |
| GAMT | 1.79896353 | 1.64825808 | 0.04073169 | 1.390067574 |
| HAR1A | 2.001584121 | 1.650965752 | 0.028468259 | 1.545639085 |
| SLC27A5 | 1.746234513 | 1.657024817 | 0.044742817 | 1.349276673 |
| RP5-1172N10.2 | 2.032847127 | 1.658889285 | 0.02688328 | 1.570517738 |
| KCNG2 | 1.738471678 | 1.661569164 | 0.045353199 | 1.343392074 |
| CTIF | 1.692291934 | 1.668604605 | 0.049180909 | 1.30820345 |
| CFP | 2.185123927 | 1.669230418 | 0.020402626 | 1.690313926 |
| ZNF579 | 1.876159569 | 1.670587846 | 0.035500645 | 1.449763762 |
| PBX4 | 2.111643747 | 1.681857314 | 0.023282804 | 1.632964717 |
| CYP2D6 | 1.806908031 | 1.685322027 | 0.040159 | 1.396217112 |
| P4HTM | 2.204760736 | 1.685431588 | 0.0196722 | 1.706147059 |
| RASL10A | 2.628321382 | 1.688174329 | 0.008994568 | 2.046019708 |
| TIAF1 | 2.400995918 | 1.708593987 | 0.013788216 | 1.860491912 |
| SYCE1 | 1.704395293 | 1.708796239 | 0.04812373 | 1.317640717 |
| FAM181B | 2.171563594 | 1.716093143 | 0.02088138 | 1.680240802 |
| CRIP3 | 2.966476144 | 1.717625425 | 0.004827315 | 2.316294355 |
| PLK5 | 1.915246991 | 1.717945672 | 0.033114908 | 1.479976452 |
| IRF3 | 2.063408494 | 1.718151866 | 0.025429232 | 1.594666763 |
| PPP1R16A | 1.748608245 | 1.722711216 | 0.04454857 | 1.351166232 |
| BAIAP2L2 | 2.027401109 | 1.723631692 | 0.027127262 | 1.566594037 |
| SLX1A | 2.77203167 | 1.730926247 | 0.006875673 | 2.162684756 |
| MACROD1 | 1.695755391 | 1.741697513 | 0.048871262 | 1.310946444 |
| WDR13 | 2.267907389 | 1.743951403 | 0.017497417 | 1.757026055 |
| CXXC11 | 2.510097357 | 1.749145334 | 0.011198042 | 1.950857907 |
| ZNF653 | 1.822980392 | 1.752355391 | 0.039043983 | 1.408445883 |
| LAMA5 | 2.43825697 | 1.759456473 | 0.012854326 | 1.890950676 |
| PLCH2 | 1.738170935 | 1.760458973 | 0.04537275 | 1.343204902 |
| MYEOV2 | 2.077104745 | 1.773972076 | 0.02482054 | 1.605188771 |
| NSUN5P2 | 1.719242607 | 1.77461223 | 0.046873128 | 1.329076066 |
| TBC1D3F | 2.658987198 | 1.776212896 | 0.00848899 | 2.071143956 |
| SELO | 2.392198921 | 1.776220117 | 0.014006351 | 1.853674988 |
| RPS21 | 2.10038491 | 1.783285114 | 0.023762441 | 1.624108943 |
| NKX6-3 | 1.869855963 | 1.787549082 | 0.035913678 | 1.444740119 |
| PNPLA7 | 1.997613819 | 1.793391169 | 0.02869086 | 1.542256434 |
| GNB3 | 2.032968503 | 1.797022372 | 0.026879871 | 1.570572812 |
| CCDC106 | 2.059984658 | 1.799413565 | 0.02559481 | 1.591848092 |
| C14orf80 | 1.762433517 | 1.80067234 | 0.043452793 | 1.3619823 |
| DNASE1L2 | 1.710591278 | 1.803033781 | 0.047613998 | 1.322265352 |
| CLDN9 | 2.209237908 | 1.806100427 | 0.019506884 | 1.709812098 |
| LPPR3 | 2.040913069 | 1.815422666 | 0.026489704 | 1.576922895 |
| CYP17A1-AS1 | 1.736584038 | 1.82134637 | 0.045509643 | 1.341896569 |
| SERGEF | 1.85747808 | 1.824288934 | 0.036681539 | 1.435552456 |
| ZDHHC19 | 2.249369261 | 1.831653672 | 0.018097306 | 1.742386059 |
| CAMSAP3 | 3.305996453 | 1.834603953 | 0.002561536 | 2.591499488 |
| RP11-572P18.1 | 2.182505863 | 1.835840642 | 0.020492274 | 1.688409837 |
| FAM229A | 1.951594706 | 1.839649301 | 0.031076216 | 1.507571869 |
| TNFRSF25 | 1.911658208 | 1.844315992 | 0.033308848 | 1.477440388 |
| FAM195A | 1.790521372 | 1.846666598 | 0.041316764 | 1.383873696 |
| LUC7L | 2.326331856 | 1.848505394 | 0.015755494 | 1.802567976 |
| OCM | 1.738340936 | 1.850479442 | 0.045360924 | 1.343318104 |
| LMTK3 | 1.834322344 | 1.852755018 | 0.038246746 | 1.417405506 |
| RP11-69E11.4 | 1.76390267 | 1.874419135 | 0.043373913 | 1.362771391 |
| ZNF296 | 1.805247326 | 1.882990066 | 0.040280098 | 1.394909486 |
| RP13-39P12.3 | 1.833713447 | 1.883907817 | 0.038295139 | 1.416856347 |
| AK8 | 1.736147795 | 1.885285619 | 0.045542933 | 1.341579008 |
| ADAMTS13 | 1.808668769 | 1.889874455 | 0.040050805 | 1.397388751 |
| CKB | 1.888719501 | 1.891271408 | 0.034678745 | 1.459936626 |
| MAP1S | 1.94132775 | 1.901957479 | 0.031689752 | 1.499081157 |
| FAM173A | 2.217053905 | 1.90603274 | 0.019234901 | 1.715910044 |
| FBLL1 | 2.3484441 | 1.907929186 | 0.015149219 | 1.81960976 |
| ADAMTSL5 | 2.25402749 | 1.913365359 | 0.017943704 | 1.746087902 |
| ANKRD9 | 1.698798197 | 1.917133498 | 0.048641872 | 1.312989721 |
| C21orf2 | 1.804484365 | 1.917903131 | 0.040334534 | 1.394322958 |
| CHTF18 | 2.33944993 | 1.918464055 | 0.015384108 | 1.812927673 |
| HMX1 | 1.917395565 | 1.928393901 | 0.033007638 | 1.481385558 |
| ZSCAN1 | 1.899939744 | 1.931942677 | 0.033971912 | 1.468880005 |
| RP3-403A15.1 | 2.429326657 | 1.94049136 | 0.013064888 | 1.883894303 |
| SHISA8 | 1.753002287 | 1.945728969 | 0.044201915 | 1.354558913 |
| DNLZ | 2.269693574 | 1.949797287 | 0.017450002 | 1.75820453 |
| RP11-573D15.2 | 1.857423523 | 1.950548733 | 0.036681539 | 1.435552456 |
| LIME1 | 2.151743783 | 1.968797096 | 0.021658464 | 1.664372348 |
| CTU1 | 2.220038393 | 1.9721158 | 0.019128719 | 1.718314115 |
| CTD-3232M19.2 | 1.757356319 | 1.983846369 | 0.043865037 | 1.357881499 |
| hsa-mir-1199 | 2.303712723 | 1.987536089 | 0.016401671 | 1.785111893 |
| MT-ND3 | 3.558693508 | 1.987810645 | 0.001593258 | 2.797714026 |
| MADCAM1 | 2.535132042 | 2.001287314 | 0.010706471 | 1.970353648 |
| C19orf80 | 2.07125502 | 2.017084531 | 0.025078837 | 1.600692607 |
| LINC00085 | 2.164543684 | 2.022078197 | 0.021158006 | 1.674525269 |
| MIB2 | 2.266253615 | 2.039156277 | 0.017546771 | 1.755802784 |
| CTAG1B | 1.875765572 | 2.043973854 | 0.03552288 | 1.449491829 |
| PCSK4 | 2.631314475 | 2.056247439 | 0.00894359 | 2.048488102 |
| TMEM91 | 1.886748117 | 2.056508521 | 0.034798435 | 1.458440285 |
| RP11-543P15.1 | 2.209297069 | 2.057635571 | 0.019506884 | 1.709812098 |
| EPS15L1 | 3.106051057 | 2.073615355 | 0.003721149 | 2.429322893 |
| ZACN | 2.319475965 | 2.076801141 | 0.015955677 | 1.797084756 |
| DPM3 | 2.726003162 | 2.084892766 | 0.007473141 | 2.126496809 |
| MYLPF | 1.914694162 | 2.085903598 | 0.033128962 | 1.47979217 |
| RPS28 | 1.722380713 | 2.100032848 | 0.046601937 | 1.331596035 |
| AGBL5-AS1 | 2.053167227 | 2.102614719 | 0.025891595 | 1.586841201 |
| MZT2A | 1.993679835 | 2.112906795 | 0.028882502 | 1.539365181 |
| PNCK | 1.751195034 | 2.113197753 | 0.04434533 | 1.353152111 |
| MEG9 | 1.716237857 | 2.116438482 | 0.047101111 | 1.32696885 |
| GRASP | 1.980183214 | 2.116525058 | 0.029581365 | 1.528981783 |
| AMH | 1.722758354 | 2.132193785 | 0.046579786 | 1.33180251 |
| ANKRD24 | 2.142069043 | 2.142993178 | 0.022032333 | 1.656939504 |
| HAGHL | 2.351235569 | 2.148671393 | 0.015073617 | 1.821782512 |
| FGF22 | 1.859298579 | 2.158391275 | 0.036582103 | 1.436731331 |
| TMEM74B | 2.385377766 | 2.18813349 | 0.014176702 | 1.8484248 |
| TPGS1 | 1.768112886 | 2.192692363 | 0.043036397 | 1.366164097 |
| TBC1D26 | 1.922525217 | 2.195603822 | 0.032711388 | 1.485301022 |
| C20orf201 | 1.960943134 | 2.213958453 | 0.030589047 | 1.514434054 |
| METTL12 | 2.229117833 | 2.222889912 | 0.018801567 | 1.725805952 |
| NPIPA7 | 2.580640423 | 2.229556835 | 0.009863642 | 2.005962705 |
| MZT2B | 1.770825497 | 2.233146367 | 0.042864782 | 1.367899379 |
| TMEM249 | 1.794289098 | 2.238739223 | 0.0410536 | 1.386648758 |
| NDUFA3 | 2.267783469 | 2.239667815 | 0.017497417 | 1.757026055 |
| AZU1 | 1.808232882 | 2.322077896 | 0.040080143 | 1.397070737 |
| UCN | 1.732373012 | 2.326838732 | 0.045862629 | 1.338541054 |
| ARMCX3-AS1 | 2.625511782 | 2.33247831 | 0.009040211 | 2.043821429 |
| LRRC26 | 1.935984004 | 2.334401287 | 0.031951669 | 1.495506455 |
| SCGB3A1 | 1.946455333 | 2.335798639 | 0.031400191 | 1.503067712 |
| MIR219-2 | 2.099750772 | 2.379825476 | 0.023785915 | 1.623680141 |
| CYP2D7P1 | 1.892871087 | 2.38285749 | 0.034416911 | 1.463228107 |
| SEMA6B | 1.896333287 | 2.406167534 | 0.034211453 | 1.465828485 |
| AP001266.1 | 1.856398661 | 2.422251109 | 0.036745283 | 1.434798405 |
| PPFIA3 | 1.81650104 | 2.462884559 | 0.039495718 | 1.403449985 |
| CTD-3193O13.9 | 2.276444343 | 2.49422413 | 0.01723389 | 1.763616685 |
| NPFF | 1.816442038 | 2.557649712 | 0.039495718 | 1.403449985 |
| CORO6 | 1.902594045 | 2.588666318 | 0.033821542 | 1.470806601 |
| BRICD5 | 2.514158994 | 2.625514181 | 0.011115872 | 1.954056449 |
| CCDC85B | 1.90316708 | 2.643550337 | 0.033815094 | 1.470889404 |
| MYH7B | 1.764726563 | 2.657071015 | 0.043315727 | 1.363354388 |
| TMEM238 | 2.576866449 | 2.658064506 | 0.009930372 | 2.003034474 |
| RHBDL1 | 2.06798108 | 2.660640408 | 0.025217601 | 1.598296228 |
| DKFZP779J2370 | 1.949456413 | 2.799350978 | 0.031211327 | 1.505687771 |
| HES4 | 1.93479396 | 2.823839152 | 0.031992897 | 1.494946435 |
| PCSK1N | 2.242630621 | 2.831490733 | 0.018330674 | 1.736821567 |
| FGF17 | 1.772428354 | 2.83377716 | 0.042730087 | 1.369266222 |
| MRPL41 | 1.736810681 | 2.876593963 | 0.04549724 | 1.342014951 |
| AL645728.2 | 2.139737491 | 2.899462937 | 0.022126016 | 1.655096783 |
| CTD-2020K17.4 | 1.941898557 | 2.962867879 | 0.031657357 | 1.499525344 |
| TMEM160 | 1.688324208 | 2.975392272 | 0.049524938 | 1.305176057 |
| H2AFB3 | 2.003225002 | 2.993153693 | 0.028377979 | 1.547018536 |
| H2AFB2 | 2.003225002 | 2.993153693 | 0.028377979 | 1.547018536 |
| LINC00202-1 | 1.684789329 | 3.033623494 | 0.049796641 | 1.302799953 |
| GTF2IRD1P1 | 1.858493995 | 3.459354305 | 0.036634626 | 1.436108232 |
| RP11-109P14.10 | 1.894106833 | 3.629392051 | 0.034340805 | 1.464189524 |
| KM-PA-2 | 1.743170422 | 4.135124785 | 0.044994604 | 1.346839571 |
| RP11-112J3.15 | 2.190615548 | 4.853793613 | 0.020186117 | 1.694947224 |
| SCXB | 1.894078569 | 5.238040128 | 0.034340805 | 1.464189524 |

| **Table S2** Significantly down-regulated genes in iLGGs. | | | | |
| --- | --- | --- | --- | --- |
| **gene** | **nlog10Pvalue** | **Log2FC** | **FDR** | **nLog10FDR** |
| CYP19A1 | 1.819880919 | -1.00012561 | 0.039243125 | 1.406236413 |
| ATAD2 | 5.934557789 | -1.000251556 | 2.05E-05 | 4.688379773 |
| EFCAB10 | 1.722851037 | -1.000411757 | 0.046579786 | 1.33180251 |
| MPEG1 | 3.923409612 | -1.000873972 | 0.000816683 | 3.087946279 |
| RSAD2 | 2.328915576 | -1.001181259 | 0.015675822 | 1.804769687 |
| KIRREL | 4.275073911 | -1.001216472 | 0.00043042 | 3.366107066 |
| DUSP4 | 2.319901332 | -1.001376284 | 0.01594285 | 1.797434043 |
| MYOG | 2.18029563 | -1.001430659 | 0.02056643 | 1.686841096 |
| PGBD4 | 3.579761001 | -1.001751691 | 0.001530831 | 2.815072803 |
| HUNK | 3.257987056 | -1.001950129 | 0.002800579 | 2.552752111 |
| DOCK7 | 5.193404737 | -1.002158356 | 7.95E-05 | 4.09954646 |
| GPR179 | 2.945433361 | -1.002286354 | 0.005010384 | 2.300128998 |
| STK17A | 4.702600117 | -1.002669307 | 0.000194639 | 3.71077123 |
| GCNT4 | 2.375883434 | -1.00306132 | 0.014414041 | 1.84121425 |
| C19orf71 | 3.156737705 | -1.003080761 | 0.003371102 | 2.472228137 |
| MITF | 5.663916536 | -1.003092607 | 3.37E-05 | 4.472396022 |
| RP3-324O17.4 | 3.067819854 | -1.003117541 | 0.00397995 | 2.400122391 |
| LAIR2 | 1.952934412 | -1.003232948 | 0.03099411 | 1.508720835 |
| FCAR | 2.101662118 | -1.003417407 | 0.023711353 | 1.625043661 |
| EXD1 | 1.776875564 | -1.003515538 | 0.042373796 | 1.372902629 |
| COPB1 | 3.004044106 | -1.005119024 | 0.004494974 | 2.34727277 |
| SLC44A3 | 5.247684381 | -1.005661138 | 7.21E-05 | 4.142275548 |
| ANKRD50 | 4.977165761 | -1.005910694 | 0.000117511 | 3.929921842 |
| UGDH | 5.521562907 | -1.006068228 | 4.33E-05 | 4.36376562 |
| ANKRD18EP | 3.324000528 | -1.006424617 | 0.002473428 | 2.606700765 |
| RARB | 6.596357628 | -1.006468149 | 6.13E-06 | 5.21262484 |
| JPH2 | 2.951725271 | -1.006944765 | 0.004952144 | 2.30520673 |
| ANXA5 | 7.287261282 | -1.007428245 | 1.76E-06 | 5.755413796 |
| RP5-994D16.9 | 3.220599569 | -1.007577902 | 0.003003421 | 2.522383739 |
| POM121B | 2.816885028 | -1.00810505 | 0.006325643 | 2.198895317 |
| SIX4 | 5.342616401 | -1.008227453 | 6.03E-05 | 4.219405674 |
| AK4 | 5.942744938 | -1.008892733 | 2.02E-05 | 4.694719232 |
| CDKN2C | 3.962496766 | -1.009101913 | 0.00076233 | 3.11785687 |
| AC006995.8 | 5.495070615 | -1.009247744 | 4.55E-05 | 4.342085778 |
| EPB41 | 5.410833626 | -1.009321116 | 5.31E-05 | 4.274987039 |
| LINC00404 | 3.60164801 | -1.010779967 | 0.001470452 | 2.832549126 |
| SEC14L4 | 2.326180438 | -1.010855711 | 0.015758217 | 1.802492921 |
| CDCA5 | 4.469490335 | -1.011160447 | 0.000300995 | 3.521440385 |
| DNAJC16 | 10.21637099 | -1.011856193 | 8.55E-09 | 8.067859488 |
| ZNF107 | 4.379120175 | -1.01204056 | 0.000355515 | 3.44914174 |
| ZBTB12P1 | 2.491468978 | -1.012084335 | 0.011626688 | 1.934543999 |
| WASF2 | 8.169266497 | -1.012368527 | 3.34E-07 | 6.476301359 |
| MS4A4A | 1.998440933 | -1.012457149 | 0.028640572 | 1.543018307 |
| ZFP69B | 3.931574204 | -1.01249186 | 0.00080496 | 3.094225903 |
| RDM1 | 2.118984302 | -1.012640478 | 0.022979616 | 1.638657234 |
| RNF19A | 4.459217434 | -1.013073421 | 0.000306665 | 3.513336239 |
| CHST3 | 5.992779349 | -1.013251926 | 1.84E-05 | 4.735669738 |
| RP11-887P2.3 | 2.530087099 | -1.013308522 | 0.010807737 | 1.966265219 |
| TNFRSF19 | 4.448659748 | -1.014057857 | 0.000312871 | 3.504634067 |
| LL0XNC01-116E7.4 | 2.676703579 | -1.014058267 | 0.008196177 | 2.086388691 |
| SP140 | 3.800787278 | -1.014617054 | 0.001022318 | 2.99041417 |
| MARVELD2 | 4.532777597 | -1.014661669 | 0.000267018 | 3.573459393 |
| PLCE1 | 4.071335317 | -1.014895581 | 0.000625454 | 3.203804521 |
| ASAP1 | 5.337073604 | -1.015607622 | 6.09E-05 | 4.215220618 |
| CD274 | 3.263958709 | -1.01624863 | 0.002771544 | 2.557278145 |
| RP11-782C8.1 | 3.790656064 | -1.016289958 | 0.001040774 | 2.982643376 |
| ACSL1 | 6.145455499 | -1.016370555 | 1.39E-05 | 4.857462111 |
| MIS18BP1 | 6.429167425 | -1.016522471 | 8.25E-06 | 5.083360123 |
| SHCBP1 | 3.222730579 | -1.016787638 | 0.002992654 | 2.523943433 |
| RP11-27I1.4 | 4.517241556 | -1.016818147 | 0.000274409 | 3.56160145 |
| C19orf35 | 4.034651717 | -1.016835229 | 0.000665513 | 3.176843368 |
| RHD | 6.55893824 | -1.01704081 | 6.54E-06 | 5.184152732 |
| AC004987.9 | 4.2234308 | -1.017169624 | 0.00047302 | 3.325120274 |
| GPR55 | 1.945743291 | -1.01730093 | 0.031433339 | 1.502609491 |
| AGO2 | 3.905853348 | -1.017521449 | 0.000843081 | 3.074130936 |
| TMED10 | 6.72443487 | -1.018586677 | 4.86E-06 | 5.313023856 |
| DLX3 | 3.59265791 | -1.018721997 | 0.001495913 | 2.825093743 |
| ZNF217 | 5.033410075 | -1.018803205 | 0.000106007 | 3.974664698 |
| TOM1L1 | 3.131980955 | -1.018870124 | 0.003540904 | 2.450885802 |
| PTPRJ | 3.705913995 | -1.019174708 | 0.001210151 | 2.917160327 |
| STK32B | 1.89800963 | -1.019193168 | 0.034095732 | 1.467299976 |
| AC098614.2 | 5.621554257 | -1.019219281 | 3.62E-05 | 4.441328934 |
| ARHGAP6 | 2.879321561 | -1.019336634 | 0.005657825 | 2.247350506 |
| CXorf21 | 2.964944416 | -1.019351117 | 0.004840013 | 2.315153434 |
| APOBEC3F | 4.541483661 | -1.019722385 | 0.000263192 | 3.579727501 |
| OR7D2 | 1.723196594 | -1.019823856 | 0.046562702 | 1.331961822 |
| CDCA7L | 3.040936682 | -1.020372733 | 0.004186917 | 2.378105642 |
| HMGN4 | 5.171453119 | -1.020381719 | 8.29E-05 | 4.081416698 |
| NCKAP5 | 5.147611614 | -1.020477102 | 8.62E-05 | 4.064572248 |
| RNF2 | 5.861068119 | -1.020653323 | 2.35E-05 | 4.628435403 |
| GLYATL1 | 2.580270804 | -1.021507609 | 0.009868137 | 2.005764848 |
| MYL9 | 2.762952995 | -1.021733809 | 0.006983525 | 2.155925302 |
| KCTD14 | 4.382536607 | -1.021781442 | 0.000352903 | 3.452344144 |
| ARHGAP20 | 3.277069759 | -1.02180879 | 0.002704747 | 2.567873276 |
| TMEM255A | 3.181502111 | -1.021965008 | 0.003231988 | 2.490530291 |
| CREB5 | 2.781829103 | -1.022112577 | 0.006758486 | 2.170150608 |
| RAG2 | 1.761222345 | -1.02227899 | 0.043556845 | 1.360943586 |
| CSNK1A1 | 4.404329104 | -1.022743211 | 0.000339051 | 3.46973541 |
| DNAJB7 | 3.222048991 | -1.022752651 | 0.002995776 | 2.523490706 |
| ITGA11 | 4.099241781 | -1.023055403 | 0.000594714 | 3.225691777 |
| TWSG1 | 6.112651567 | -1.023267689 | 1.48E-05 | 4.830761247 |
| SEC24A | 4.871343863 | -1.023274396 | 0.000142175 | 3.847177531 |
| CPQ | 6.572361786 | -1.023308571 | 6.39E-06 | 5.194752826 |
| CYP7B1 | 3.611998279 | -1.023380703 | 0.001442654 | 2.840837802 |
| RAB11FIP1 | 4.778727157 | -1.023598485 | 0.000168953 | 3.77223285 |
| KIF20B | 5.153198535 | -1.023707008 | 8.55E-05 | 4.068155003 |
| WNT9B | 2.671895038 | -1.024085056 | 0.008274126 | 2.08227789 |
| ANGPTL1 | 1.77595318 | -1.024182263 | 0.042441229 | 1.372212045 |
| RFWD3 | 5.993509096 | -1.024358032 | 1.84E-05 | 4.735669738 |
| DSP | 5.020521745 | -1.024467506 | 0.000108819 | 3.963295162 |
| TM4SF1 | 4.163055275 | -1.024669906 | 0.000527598 | 3.277696678 |
| ZNF490 | 4.904283145 | -1.02517325 | 0.000134504 | 3.871263995 |
| CD38 | 4.589519578 | -1.025741474 | 0.000241034 | 3.617921203 |
| TAGAP | 3.959230977 | -1.025889102 | 0.000766771 | 3.115334058 |
| SP6 | 3.927652433 | -1.027351748 | 0.000810794 | 3.091089283 |
| GRK6P1 | 4.368925097 | -1.02767424 | 0.000362398 | 3.440814803 |
| NCAPD2 | 4.645053591 | -1.027741397 | 0.000216997 | 3.663547147 |
| TCTEX1D4 | 1.792386495 | -1.027942746 | 0.041178417 | 1.385330357 |
| CDH2 | 4.983150661 | -1.027951024 | 0.000116874 | 3.932282664 |
| GPR133 | 6.52665178 | -1.028318879 | 6.91E-06 | 5.160363008 |
| IRAK3 | 6.099465636 | -1.028458305 | 1.52E-05 | 4.819321508 |
| RBBP5 | 7.320333062 | -1.028461785 | 1.64E-06 | 5.78394048 |
| LRP12 | 5.436066479 | -1.028488742 | 5.05E-05 | 4.296566647 |
| ALG10B | 2.694024427 | -1.029409073 | 0.007949095 | 2.099682317 |
| CXorf67 | 2.409033469 | -1.029804072 | 0.013575081 | 1.867257563 |
| AMICA1 | 3.472835518 | -1.030185737 | 0.001874911 | 2.727019249 |
| KANK4 | 2.119393274 | -1.030547374 | 0.022965691 | 1.638920492 |
| SERINC5 | 3.024970788 | -1.030647807 | 0.004311326 | 2.365389181 |
| TMBIM1 | 7.680918481 | -1.030949254 | 8.35E-07 | 6.078227104 |
| EIF4G2 | 5.822714474 | -1.031446699 | 2.51E-05 | 4.600716371 |
| LAMC2 | 1.80278433 | -1.031586773 | 0.040437982 | 1.39321053 |
| ABCA4 | 2.439856307 | -1.031593931 | 0.012823685 | 1.891987155 |
| TIMELESS | 4.906559387 | -1.031672087 | 0.000133731 | 3.873766969 |
| RAB8A | 5.976166934 | -1.032035283 | 1.90E-05 | 4.721429298 |
| ZNF714 | 4.214212253 | -1.032796594 | 0.000481698 | 3.317224888 |
| SPTY2D1 | 6.631315124 | -1.032990994 | 5.76E-06 | 5.239267819 |
| AP000345.1 | 3.65267481 | -1.033474629 | 0.001337241 | 2.873790269 |
| RSU1 | 5.422662263 | -1.034253533 | 5.20E-05 | 4.284131177 |
| NRG1 | 2.76012774 | -1.034387212 | 0.00701267 | 2.154116606 |
| TNF | 1.967782538 | -1.034605991 | 0.030224061 | 1.519647187 |
| TPST1 | 7.555470222 | -1.03601759 | 1.05E-06 | 5.977222228 |
| PRIMA1 | 3.860027055 | -1.036232369 | 0.000913878 | 3.039111602 |
| COBLL1 | 5.15777197 | -1.037382689 | 8.49E-05 | 4.071174887 |
| CNKSR3 | 4.959734174 | -1.037431383 | 0.000121886 | 3.914047431 |
| SMNDC1 | 5.833252822 | -1.037445788 | 2.48E-05 | 4.606421063 |
| CPD | 5.273400189 | -1.038181614 | 6.88E-05 | 4.162314762 |
| SLCO5A1 | 4.766979107 | -1.038340589 | 0.00017293 | 3.762128776 |
| CAST | 6.035065103 | -1.038380085 | 1.71E-05 | 4.768268821 |
| LPHN2 | 4.979296248 | -1.038524397 | 0.000117511 | 3.929921842 |
| WARS | 6.565384366 | -1.038545289 | 6.47E-06 | 5.188863286 |
| CEACAM1 | 3.016058236 | -1.038839126 | 0.00439227 | 2.35731094 |
| MYO1A | 2.458144875 | -1.038858294 | 0.012380036 | 1.907278099 |
| WDR88 | 4.95210556 | -1.039069373 | 0.000123669 | 3.907739723 |
| COMMD2 | 6.038700918 | -1.039094493 | 1.70E-05 | 4.769883838 |
| APLN | 3.388765502 | -1.039118244 | 0.002183786 | 2.660789921 |
| EPHA3 | 3.635582369 | -1.039700183 | 0.001380867 | 2.859848158 |
| B3GNT5 | 3.205253837 | -1.03971442 | 0.003084691 | 2.510788371 |
| NRAS | 7.127019718 | -1.040360811 | 2.35E-06 | 5.629007783 |
| GNAI3 | 7.252642145 | -1.040679683 | 1.87E-06 | 5.728365826 |
| DARS2 | 5.684068255 | -1.04077945 | 3.24E-05 | 4.490035231 |
| FAM126A | 4.363401522 | -1.041099668 | 0.000365816 | 3.436737709 |
| SLC16A1 | 4.151196376 | -1.041550629 | 0.000540224 | 3.267426375 |
| CRISPLD2 | 3.861656626 | -1.041622588 | 0.000911252 | 3.040361728 |
| GNL3LP1 | 4.316963309 | -1.042053054 | 0.000398353 | 3.399732285 |
| IFT57 | 7.519617905 | -1.042190326 | 1.14E-06 | 5.944713734 |
| OGFOD1 | 6.156103371 | -1.043268035 | 1.37E-05 | 4.86434561 |
| TIGD4 | 4.204123736 | -1.043336495 | 0.000490902 | 3.309005578 |
| MEX3C | 5.557117984 | -1.043430655 | 4.04E-05 | 4.393560514 |
| C6orf195 | 2.397034395 | -1.043525089 | 0.013876519 | 1.857719466 |
| PTTG1 | 3.952883427 | -1.043916946 | 0.000775147 | 3.110615651 |
| NOTCH2 | 6.283066385 | -1.044185378 | 1.08E-05 | 4.967434256 |
| TSPAN19 | 2.442964897 | -1.04422649 | 0.01274407 | 1.894691844 |
| FOXO1 | 4.890742273 | -1.044284724 | 0.000137407 | 3.861990931 |
| CABP4 | 2.912097291 | -1.044320751 | 0.005334412 | 2.27291342 |
| PRPS1P2 | 4.407966797 | -1.044328271 | 0.00033708 | 3.472267038 |
| CMTM6 | 6.444696706 | -1.044365627 | 8.00E-06 | 5.096774445 |
| TGIF1 | 3.994391173 | -1.044688844 | 0.000718942 | 3.143305962 |
| C17orf53 | 4.899804153 | -1.044907533 | 0.000135274 | 3.868786586 |
| RPL35P2 | 2.071874524 | -1.044986685 | 0.025058683 | 1.60104176 |
| MYO18B | 3.173127984 | -1.045152036 | 0.003279997 | 2.484126545 |
| BCL10 | 7.984620598 | -1.045544974 | 4.74E-07 | 6.324532014 |
| ZNF597 | 4.569880748 | -1.045839929 | 0.000249944 | 3.60215791 |
| HSPA1B | 3.24331223 | -1.045870046 | 0.002879905 | 2.540621789 |
| GALNT15 | 5.238030036 | -1.045992939 | 7.36E-05 | 4.133270283 |
| FCN1 | 3.233087441 | -1.047408567 | 0.00293371 | 2.532582886 |
| RP1-122P22.2 | 2.622980713 | -1.04816865 | 0.009083922 | 2.041726602 |
| INS-IGF2 | 2.64735038 | -1.048249739 | 0.008680597 | 2.06145043 |
| SP100 | 4.182014444 | -1.048771653 | 0.000510488 | 3.292014818 |
| MYADM | 6.55001548 | -1.050586834 | 6.66E-06 | 5.176436239 |
| CREB1 | 5.198358846 | -1.050820148 | 7.88E-05 | 4.103295432 |
| THEM5 | 2.914497457 | -1.050829366 | 0.005312324 | 2.274715466 |
| PRSS12 | 2.825662195 | -1.051033724 | 0.006230394 | 2.205484518 |
| PIEZO2 | 2.68675589 | -1.051844478 | 0.008053481 | 2.094016358 |
| MTDH | 4.89500799 | -1.052714132 | 0.000135963 | 3.866579193 |
| GPR160 | 6.46093396 | -1.052882226 | 7.74E-06 | 5.11126089 |
| KCTD19 | 2.463768266 | -1.053491337 | 0.012243689 | 1.912087724 |
| PTAR1 | 7.119038878 | -1.053524071 | 2.38E-06 | 5.623948221 |
| C4orf26 | 1.70644958 | -1.05365921 | 0.04796432 | 1.319081705 |
| FBXO5 | 4.772979505 | -1.053754973 | 0.000171364 | 3.766080371 |
| CASP16 | 4.21274691 | -1.053760698 | 0.000482874 | 3.316166034 |
| RAB8B | 6.506617858 | -1.053815583 | 7.16E-06 | 5.145122858 |
| SH2D2A | 4.299103136 | -1.054128391 | 0.000410771 | 3.386400722 |
| USP1 | 7.292931362 | -1.054152639 | 1.74E-06 | 5.759786308 |
| HIST2H2BE | 8.931393974 | -1.054189873 | 8.11E-08 | 7.090993999 |
| IFIT3 | 4.20295928 | -1.054372339 | 0.000492065 | 3.307977124 |
| RP11-57H12.3 | 3.134750467 | -1.054863921 | 0.003523614 | 2.453011654 |
| BMF | 4.352424214 | -1.054957767 | 0.000373448 | 3.427770266 |
| CALCB | 2.213858418 | -1.055265335 | 0.019347881 | 1.713366598 |
| EMILIN2 | 3.726644153 | -1.055444007 | 0.001164675 | 2.933795213 |
| RP11-576I22.2 | 2.813026306 | -1.055515486 | 0.00637481 | 2.195532752 |
| AC129492.6 | 1.842457983 | -1.055736787 | 0.037702848 | 1.423625848 |
| ACAN | 1.869261842 | -1.055906948 | 0.035954706 | 1.444244263 |
| PSTPIP2 | 4.130488672 | -1.055933384 | 0.000562163 | 3.250137587 |
| CHRNG | 2.065953964 | -1.057020391 | 0.025311999 | 1.596673555 |
| PDIA4 | 7.579896274 | -1.057100622 | 1.01E-06 | 5.994320469 |
| SERPING1 | 3.753972264 | -1.057162412 | 0.001108366 | 2.955316972 |
| SLC1A5 | 4.743414755 | -1.058047236 | 0.000181305 | 3.741589057 |
| PAG1 | 5.35905526 | -1.058119506 | 5.87E-05 | 4.231397271 |
| B4GALT1 | 9.17246987 | -1.05852906 | 5.25E-08 | 7.279666299 |
| SPATA17 | 2.031198457 | -1.059379273 | 0.026956721 | 1.569332934 |
| RP1-317E23.3 | 2.291305442 | -1.059944824 | 0.016774969 | 1.775338284 |
| LDHAL6A | 3.361567226 | -1.060492583 | 0.002300317 | 2.638212358 |
| ANKRD20A1 | 3.031134046 | -1.060725399 | 0.004268023 | 2.36977322 |
| LAIR1 | 3.201477792 | -1.060798874 | 0.003105622 | 2.507851459 |
| TOB2P1 | 2.744612467 | -1.061005217 | 0.007223206 | 2.141269974 |
| PTCH1 | 4.442945648 | -1.06123182 | 0.000316096 | 3.500181648 |
| ROCK1 | 6.370305287 | -1.061608649 | 9.21E-06 | 5.035514215 |
| KIAA0101 | 2.959462235 | -1.061830778 | 0.004882932 | 2.31131931 |
| AC063976.7 | 2.367305795 | -1.06222555 | 0.014653989 | 1.834044142 |
| C6orf123 | 1.970740692 | -1.06258663 | 0.030057134 | 1.522052429 |
| OGN | 2.835803598 | -1.062636126 | 0.006122892 | 2.21304343 |
| GPR34 | 4.555607143 | -1.062991466 | 0.0002563 | 3.591251723 |
| SOX10 | 3.082712882 | -1.063001052 | 0.003877239 | 2.411477471 |
| PAPSS2 | 4.861362684 | -1.06303202 | 0.000145444 | 3.837304999 |
| PSORS1C1 | 2.572557822 | -1.063408823 | 0.010001968 | 1.999914561 |
| PFN1P3 | 1.939276018 | -1.063706549 | 0.031781961 | 1.497819308 |
| PLA2G7 | 3.799819161 | -1.063803703 | 0.001023547 | 2.989892025 |
| SMCR8 | 3.523581482 | -1.064332777 | 0.001702091 | 2.769017167 |
| SNX20 | 2.714156633 | -1.064414879 | 0.007657352 | 2.115921368 |
| LHFPL5 | 2.279443769 | -1.064507879 | 0.017129963 | 1.766243587 |
| RP11-3J10.4 | 4.951590772 | -1.064923645 | 0.000123669 | 3.907739723 |
| AC019097.7 | 3.365222289 | -1.065731493 | 0.00228422 | 2.641262139 |
| C16orf54 | 4.365440102 | -1.066291477 | 0.000364288 | 3.438555101 |
| SLC33A1 | 6.689056718 | -1.066682199 | 5.15E-06 | 5.287803854 |
| NMD3P1 | 3.45739273 | -1.067144765 | 0.001924719 | 2.715632561 |
| SMC5 | 6.831090078 | -1.067406413 | 4.00E-06 | 5.397662444 |
| ZNF618 | 8.053183742 | -1.067473082 | 4.15E-07 | 6.382031712 |
| MEST | 4.91702111 | -1.068385055 | 0.000131995 | 3.879442699 |
| PTRF | 4.449486139 | -1.068726048 | 0.000312426 | 3.505252386 |
| PTPN13 | 4.976898956 | -1.068810774 | 0.000117511 | 3.929921842 |
| CHSY3 | 4.550268118 | -1.069100248 | 0.000259484 | 3.585889883 |
| PIK3CA | 5.372215692 | -1.069480769 | 5.72E-05 | 4.242357539 |
| CCDC116 | 4.233173617 | -1.069524523 | 0.000464478 | 3.333034608 |
| TEAD2 | 3.373448267 | -1.069595397 | 0.00224826 | 2.648153528 |
| RPS7P14 | 2.570065773 | -1.069955427 | 0.010040603 | 1.998240218 |
| FAM3D | 2.181903443 | -1.0700029 | 0.020509614 | 1.688042509 |
| LANCL3 | 5.142201259 | -1.070031269 | 8.69E-05 | 4.060774592 |
| CD300C | 4.286462436 | -1.070088839 | 0.000420869 | 3.375853494 |
| PLIN2 | 5.562194945 | -1.070092949 | 4.01E-05 | 4.396953428 |
| KAL1 | 5.581835321 | -1.07024671 | 3.87E-05 | 4.412031135 |
| MAP3K8 | 3.964502701 | -1.071108634 | 0.000759379 | 3.119541363 |
| OXTR | 1.846256703 | -1.071591663 | 0.037431375 | 1.426764224 |
| SIPA1L2 | 7.289914966 | -1.071963577 | 1.75E-06 | 5.757167128 |
| DHH | 3.248864712 | -1.072590959 | 0.002849371 | 2.545250989 |
| AAED1 | 9.359683373 | -1.072628684 | 3.84E-08 | 7.415401613 |
| MBD2 | 6.826786856 | -1.074132115 | 4.00E-06 | 5.397662444 |
| RGS18 | 4.344688379 | -1.074239893 | 0.000377834 | 3.422699191 |
| PLEKHA3 | 5.569806439 | -1.074452138 | 3.95E-05 | 4.403611295 |
| GLI3 | 5.297640394 | -1.074571644 | 6.56E-05 | 4.183054054 |
| CAPZA2 | 4.656254321 | -1.074706197 | 0.000213491 | 3.670620538 |
| MAD2L1 | 5.576752736 | -1.07514449 | 3.90E-05 | 4.408436342 |
| MTF1 | 7.923104212 | -1.075255539 | 5.31E-07 | 6.274705345 |
| NAT1 | 4.632136069 | -1.075641857 | 0.000222592 | 3.652489757 |
| ERCC6L2 | 5.00781142 | -1.075818211 | 0.000111411 | 3.953073264 |
| ERAP1 | 5.190560033 | -1.076109559 | 7.99E-05 | 4.097411739 |
| KPNA2 | 6.415246715 | -1.076191672 | 8.48E-06 | 5.071596525 |
| TFEC | 5.134359428 | -1.0766995 | 8.80E-05 | 4.055762505 |
| SERBP1P1 | 2.284676534 | -1.079099368 | 0.016983107 | 1.769982855 |
| ZNF322P1 | 3.935970848 | -1.079296714 | 0.000798587 | 3.097677539 |
| ARHGAP29 | 6.173291577 | -1.079467783 | 1.32E-05 | 4.878783812 |
| GP1BA | 6.572453795 | -1.080155312 | 6.39E-06 | 5.194752826 |
| BRD7P2 | 2.287022004 | -1.080721893 | 0.016920778 | 1.771579684 |
| SP110 | 6.906013936 | -1.081604987 | 3.48E-06 | 5.457954309 |
| MTTP | 3.761370444 | -1.081821905 | 0.0010958 | 2.960268775 |
| HIF1A | 5.202354745 | -1.082353619 | 7.85E-05 | 4.105027429 |
| UBE2SP1 | 2.869602643 | -1.082644778 | 0.005754704 | 2.23997702 |
| CECR1 | 7.980930393 | -1.083017035 | 4.74E-07 | 6.324532014 |
| SLFN5 | 4.703658945 | -1.083050018 | 0.000194639 | 3.71077123 |
| VN1R108P | 4.265422682 | -1.083908497 | 0.00043865 | 3.357882098 |
| FBXO43 | 4.121570606 | -1.084011816 | 0.000572258 | 3.242408164 |
| ATF7IP | 4.636172462 | -1.085383844 | 0.000220904 | 3.655796563 |
| DISP1 | 6.392672175 | -1.085421363 | 8.84E-06 | 5.053493528 |
| HAVCR2 | 5.805594828 | -1.085991037 | 2.59E-05 | 4.58635093 |
| LINGO4 | 2.617373843 | -1.086461781 | 0.009176166 | 2.037338722 |
| CIDEC | 3.354163286 | -1.086697197 | 0.002332726 | 2.632136292 |
| SRGAP2B | 4.044313544 | -1.086722977 | 0.000654572 | 3.184042839 |
| KDELC2 | 3.718568881 | -1.086966525 | 0.001181131 | 2.927702063 |
| CD55 | 5.735766159 | -1.087229374 | 2.94E-05 | 4.531062194 |
| NFE2 | 4.640458435 | -1.087992533 | 0.000219323 | 3.65891653 |
| LEPREL1 | 2.380055438 | -1.088149442 | 0.014304614 | 1.844523863 |
| PHACTR2 | 5.891054046 | -1.088242914 | 2.23E-05 | 4.652626907 |
| GATM | 3.391995943 | -1.089473077 | 0.002170043 | 2.663531587 |
| KIAA1024 | 4.576969976 | -1.089601989 | 0.000246831 | 3.60760065 |
| MSL3P1 | 3.772050111 | -1.090057344 | 0.001075778 | 2.968277173 |
| ADAM19 | 6.123904893 | -1.09012426 | 1.45E-05 | 4.839088373 |
| IKBIP | 6.912123966 | -1.090431942 | 3.44E-06 | 5.463084532 |
| PPP4R1L | 4.902263606 | -1.09059804 | 0.000134504 | 3.871263995 |
| MND1 | 3.876956469 | -1.090610751 | 0.000886826 | 3.052161814 |
| SUCNR1 | 3.04822332 | -1.091544942 | 0.004134278 | 2.383600326 |
| OAS3 | 3.86422797 | -1.09155869 | 0.000906503 | 3.04263062 |
| ITPR2 | 5.044802379 | -1.091966733 | 0.00010376 | 3.983969834 |
| ARHGAP30 | 6.657780975 | -1.091992337 | 5.47E-06 | 5.262099976 |
| CAMK2D | 6.494791502 | -1.092016576 | 7.30E-06 | 5.136402646 |
| MANEA | 5.487710123 | -1.092362833 | 4.61E-05 | 4.336326514 |
| ANGPT4 | 3.215485216 | -1.092637426 | 0.003031828 | 2.518295397 |
| RSBN1 | 7.484839624 | -1.093138992 | 1.21E-06 | 5.918688775 |
| PARP9 | 4.28485423 | -1.093345281 | 0.000422135 | 3.374548825 |
| IRAK2 | 4.599846695 | -1.093468011 | 0.000236107 | 3.626891896 |
| BRCA1 | 8.158900652 | -1.094038596 | 3.40E-07 | 6.468901554 |
| TRPM3 | 3.91866184 | -1.09408351 | 0.000823877 | 3.08413759 |
| IL13RA1 | 6.685350529 | -1.094204149 | 5.15E-06 | 5.287803854 |
| RPL4P6 | 4.862109252 | -1.095243084 | 0.000144792 | 3.839256808 |
| C3AR1 | 5.971013452 | -1.095247997 | 1.91E-05 | 4.718987149 |
| TROVE2 | 5.147630898 | -1.095497019 | 8.62E-05 | 4.064572248 |
| PIGK | 6.340802358 | -1.095608565 | 9.73E-06 | 5.011854462 |
| OR2L13 | 3.46102116 | -1.096338227 | 0.001911484 | 2.718629392 |
| RGS2 | 5.317329909 | -1.096517099 | 6.32E-05 | 4.199450646 |
| SHISA3 | 2.789100164 | -1.096703482 | 0.006663494 | 2.176297983 |
| IP6K3 | 2.019504727 | -1.096784711 | 0.027541203 | 1.560017096 |
| RAPH1 | 6.301599849 | -1.096816873 | 1.04E-05 | 4.98093604 |
| TMEM233 | 2.490162043 | -1.097418468 | 0.011652878 | 1.933566798 |
| RP11-211G3.2 | 3.126842958 | -1.097444785 | 0.003574915 | 2.446734297 |
| FNBP1L | 5.127269076 | -1.097584636 | 8.90E-05 | 4.050633534 |
| C1GALT1 | 7.236585026 | -1.097729138 | 1.92E-06 | 5.71766915 |
| ALDH3A1 | 2.64082823 | -1.097865965 | 0.008778101 | 2.056599433 |
| AF127936.5 | 4.112976456 | -1.099261068 | 0.000580604 | 3.236120003 |
| APOL1 | 4.395798017 | -1.09933556 | 0.000344997 | 3.462184659 |
| TP73-AS1 | 6.838085485 | -1.099473989 | 3.93E-06 | 5.405159336 |
| TNFRSF1A | 5.935610016 | -1.099807283 | 2.05E-05 | 4.688379773 |
| PRSS16 | 2.200957158 | -1.100489064 | 0.019809081 | 1.703135677 |
| AURKB | 3.240839748 | -1.10189142 | 0.002892505 | 2.538725841 |
| ANKRD61 | 3.950060504 | -1.102155244 | 0.000777466 | 3.109318383 |
| HTR6 | 3.407351618 | -1.102333697 | 0.002113717 | 2.674953106 |
| NLGN4Y | 1.840009039 | -1.102493413 | 0.037858531 | 1.421836239 |
| CTA-85E5.10 | 2.578279572 | -1.10250248 | 0.009909052 | 2.003967909 |
| SEMA3D | 2.298172288 | -1.103435549 | 0.016566188 | 1.780777405 |
| RP11-641D5.1 | 3.125765609 | -1.103591931 | 0.003582888 | 2.445766803 |
| ZSCAN12P1 | 2.316920604 | -1.10374257 | 0.01603297 | 1.794986023 |
| TSSK3 | 3.463124908 | -1.104020096 | 0.001905571 | 2.719974806 |
| RP11-726G1.1 | 1.792660259 | -1.10427157 | 0.041158 | 1.385545734 |
| GPBAR1 | 3.802115441 | -1.104597592 | 0.001019884 | 2.99144923 |
| FAM194B | 3.394950927 | -1.105120626 | 0.00216264 | 2.66501573 |
| PCDHB15 | 4.04269248 | -1.10519214 | 0.000655995 | 3.183099391 |
| KIF18B | 3.398721043 | -1.105310951 | 0.002149417 | 2.66767923 |
| RHPN2 | 6.806187259 | -1.106298486 | 4.13E-06 | 5.383823856 |
| HNRNPA1P59 | 2.938755885 | -1.106634364 | 0.005071494 | 2.294864098 |
| TICRR | 6.027914438 | -1.106653268 | 1.72E-05 | 4.764586215 |
| RP5-961K14.1 | 1.940491881 | -1.106760456 | 0.031718438 | 1.498688212 |
| C22orf34 | 5.345750174 | -1.106826722 | 6.00E-05 | 4.221980964 |
| PLEKHG4 | 2.625696434 | -1.107050195 | 0.009040001 | 2.043831517 |
| TMEM123 | 6.311374041 | -1.107075564 | 1.03E-05 | 4.987734267 |
| ZNF595 | 2.194590909 | -1.1071546 | 0.02004183 | 1.698062619 |
| NBPF2P | 4.195265987 | -1.107415474 | 0.000498228 | 3.30257219 |
| DAB2 | 5.503285399 | -1.107462259 | 4.47E-05 | 4.3493298 |
| RP5-857K21.4 | 3.907110312 | -1.107530342 | 0.000841245 | 3.075077468 |
| BMP8B | 3.79168136 | -1.107660996 | 0.001039023 | 2.98337503 |
| IFIT2 | 5.611544689 | -1.107791026 | 3.69E-05 | 4.433322569 |
| RCAN3 | 4.418473282 | -1.107887792 | 0.000330672 | 3.480602559 |
| LRRC37A15P | 2.780970188 | -1.107887792 | 0.006766656 | 2.169625906 |
| CD8B | 2.759747577 | -1.108099744 | 0.007017318 | 2.153828842 |
| CCRL2 | 5.709156995 | -1.108312463 | 3.08E-05 | 4.512021174 |
| NEDD1 | 5.9208005 | -1.108625108 | 2.10E-05 | 4.678077878 |
| CUBN | 2.812162619 | -1.108692992 | 0.006383644 | 2.194931336 |
| PGM5P1 | 2.847987984 | -1.109531265 | 0.005987889 | 2.222726229 |
| OR2A20P | 3.119876578 | -1.109661619 | 0.003623585 | 2.440861574 |
| NUDCD1 | 6.837911613 | -1.11043824 | 3.93E-06 | 5.405159336 |
| KCNG4 | 2.142448118 | -1.110471995 | 0.022028653 | 1.65701206 |
| TGFBR1 | 6.427934843 | -1.110654603 | 8.27E-06 | 5.082701289 |
| SLC10A1 | 1.851525917 | -1.110899396 | 0.03707742 | 1.430890488 |
| ONECUT2 | 3.810857694 | -1.111537414 | 0.001000923 | 2.999599297 |
| ACOT12 | 1.728174818 | -1.11165891 | 0.046217722 | 1.335191468 |
| TACR3 | 3.25651029 | -1.111807579 | 0.002807993 | 2.551604011 |
| REST | 6.022017484 | -1.111823226 | 1.74E-05 | 4.760699511 |
| PHACTR4 | 7.482811857 | -1.112106585 | 1.21E-06 | 5.916883102 |
| FTH1P2 | 3.102150643 | -1.112215573 | 0.003745347 | 2.426507882 |
| CYP1B1 | 4.404121358 | -1.112671499 | 0.000339051 | 3.46973541 |
| CENPL | 8.523760295 | -1.113052184 | 1.74E-07 | 6.760305863 |
| KLHL34 | 2.681684056 | -1.113199411 | 0.008124809 | 2.090186849 |
| TSHZ2 | 4.366360262 | -1.114048607 | 0.000363767 | 3.439177188 |
| ACADL | 3.935534977 | -1.114098637 | 0.000798807 | 3.097558083 |
| RP4-781K5.2 | 4.038529617 | -1.114291424 | 0.000660748 | 3.179963953 |
| NKX3-1 | 5.010863652 | -1.115118725 | 0.000110749 | 3.955660956 |
| KIAA1524 | 5.2361462 | -1.115704022 | 7.38E-05 | 4.131894359 |
| CAP1 | 9.341705723 | -1.11647949 | 3.95E-08 | 7.403862017 |
| GRM6 | 2.546419949 | -1.116881486 | 0.010493835 | 1.979065761 |
| PDGFC | 6.621496084 | -1.116956656 | 5.85E-06 | 5.232893119 |
| RP11-292B8.1 | 2.779137149 | -1.117069587 | 0.006790271 | 2.1681129 |
| MARK2P9 | 2.549719519 | -1.117301822 | 0.010424545 | 1.981942874 |
| PGR | 4.167558974 | -1.117407092 | 0.00052413 | 3.280561089 |
| FKBP7 | 7.232108274 | -1.117948562 | 1.93E-06 | 5.71396701 |
| DPY19L1 | 6.313596257 | -1.118066848 | 1.03E-05 | 4.988142847 |
| LDHA | 6.619165523 | -1.118313679 | 5.86E-06 | 5.232197654 |
| RPS15AP36 | 2.337099707 | -1.11889349 | 0.015448446 | 1.811115201 |
| PANX1 | 5.548956889 | -1.11896037 | 4.11E-05 | 4.386250607 |
| MORF4L1P1 | 5.64347649 | -1.11908654 | 3.47E-05 | 4.459175223 |
| RP11-574F21.2 | 4.096916444 | -1.119690975 | 0.000596998 | 3.224027098 |
| HRH1 | 7.812107697 | -1.120260935 | 6.51E-07 | 6.186154919 |
| C9orf147 | 5.654990057 | -1.121237177 | 3.41E-05 | 4.467647733 |
| TNFAIP3 | 5.166322183 | -1.121272973 | 8.37E-05 | 4.07741588 |
| RBM43 | 5.819251178 | -1.121635042 | 2.54E-05 | 4.595727973 |
| UBQLNL | 3.408270021 | -1.122034638 | 0.002111052 | 2.67550104 |
| TRAM2 | 6.95525122 | -1.122697609 | 3.23E-06 | 5.490353915 |
| TRAC | 1.938556126 | -1.122840449 | 0.031813801 | 1.497384439 |
| CEP135 | 5.784247699 | -1.123147234 | 2.70E-05 | 4.569167435 |
| PRDM1 | 4.583079632 | -1.12426857 | 0.000244063 | 3.612498714 |
| MR1 | 3.796744344 | -1.12582925 | 0.001029286 | 2.987463728 |
| CKM | 2.311032076 | -1.126555174 | 0.016203598 | 1.790388531 |
| SLC40A1 | 5.848552402 | -1.126817349 | 2.41E-05 | 4.618746567 |
| TAT | 2.022689716 | -1.12704591 | 0.027369021 | 1.562740744 |
| DUSP16 | 4.002031448 | -1.127259092 | 0.000709082 | 3.149303431 |
| C1orf87 | 1.723520139 | -1.128754355 | 0.046546127 | 1.332116454 |
| TMC5 | 2.722513713 | -1.129090855 | 0.007525551 | 2.123461685 |
| GPRIN3 | 8.861817156 | -1.129788448 | 9.16E-08 | 7.038027071 |
| TLR7 | 4.786760322 | -1.130232057 | 0.000166525 | 3.778521084 |
| ANPEP | 4.369403253 | -1.130368039 | 0.000362035 | 3.441249442 |
| CA2 | 4.639038299 | -1.130541666 | 0.000220169 | 3.65724313 |
| KDR | 5.755722185 | -1.130962489 | 2.85E-05 | 4.545214643 |
| HLA-DMA | 3.63529944 | -1.131137597 | 0.0013809 | 2.859837685 |
| PLEK | 4.198236925 | -1.131216494 | 0.000496738 | 3.303872656 |
| MCM8 | 5.645834499 | -1.131590097 | 3.46E-05 | 4.460742544 |
| FAS | 4.357141326 | -1.131642625 | 0.000370062 | 3.43172597 |
| NID2 | 4.399644321 | -1.131736504 | 0.000341719 | 3.466331349 |
| IKZF1 | 7.371581596 | -1.131906396 | 1.49E-06 | 5.827039655 |
| DCBLD2 | 5.057933563 | -1.131913657 | 0.000101144 | 3.995058809 |
| SVOPL | 1.803466455 | -1.132087673 | 0.040396364 | 1.39365772 |
| PRR26 | 3.238206876 | -1.132223744 | 0.002904705 | 2.53689793 |
| RP1-40E16.9 | 2.877900569 | -1.132264813 | 0.005672527 | 2.246223418 |
| UBE2C | 2.719738734 | -1.132889851 | 0.007572204 | 2.120777687 |
| DYRK3 | 5.222688351 | -1.13293134 | 7.59E-05 | 4.119804109 |
| BHMT2 | 6.003116411 | -1.132952572 | 1.80E-05 | 4.744841333 |
| TBX15 | 4.151436201 | -1.133905154 | 0.000540224 | 3.267426375 |
| KRT18P59 | 4.799873825 | -1.13410878 | 0.000163317 | 3.786969085 |
| IFIH1 | 6.576195885 | -1.134586737 | 6.34E-06 | 5.198003927 |
| ESRP1 | 1.864091902 | -1.134972555 | 0.036266456 | 1.440494883 |
| ARRDC3 | 6.781146427 | -1.135132202 | 4.35E-06 | 5.361659217 |
| TCTE3 | 3.177007275 | -1.135516064 | 0.003257194 | 2.487156361 |
| MORC1 | 4.894357336 | -1.1359175 | 0.000136725 | 3.864151085 |
| ACSS3 | 4.227732555 | -1.136127887 | 0.000468665 | 3.32913784 |
| LINC00856 | 3.76392501 | -1.13614019 | 0.00109134 | 2.962040022 |
| BTN2A2 | 5.381611097 | -1.136324164 | 5.63E-05 | 4.249198916 |
| CCR1 | 4.065345694 | -1.137418269 | 0.00063111 | 3.199895119 |
| CHURC1-FNTB | 3.593451885 | -1.137890506 | 0.001494309 | 2.825559633 |
| AC092198.1 | 2.174435462 | -1.138039334 | 0.020770876 | 1.682545188 |
| LIPG | 2.519025232 | -1.13854514 | 0.011021011 | 1.957778564 |
| SLC35D1 | 6.346151861 | -1.13899846 | 9.65E-06 | 5.015665722 |
| APOL6 | 4.970567267 | -1.13921116 | 0.000118908 | 3.924787583 |
| TNFRSF8 | 2.195496254 | -1.139223202 | 0.020006704 | 1.698824458 |
| STK38L | 5.185833762 | -1.139431102 | 8.07E-05 | 4.093290082 |
| MYOZ3 | 3.623755061 | -1.141229304 | 0.00141145 | 2.850334554 |
| TIPARP | 6.469282261 | -1.1414146 | 7.66E-06 | 5.116025596 |
| ADAMTSL3 | 4.379924217 | -1.141682318 | 0.000354983 | 3.449792814 |
| GABRE | 2.891178075 | -1.141710494 | 0.005539197 | 2.256553204 |
| EXT1 | 6.941241885 | -1.142098836 | 3.29E-06 | 5.483409862 |
| MYO1B | 6.404240446 | -1.142497779 | 8.65E-06 | 5.062949184 |
| SLC46A2 | 2.680828036 | -1.14277812 | 0.008132304 | 2.089786384 |
| TNFSF18 | 1.872124643 | -1.142866895 | 0.03576164 | 1.446582569 |
| C10orf10 | 5.339105811 | -1.143989081 | 6.08E-05 | 4.216203454 |
| IPO8P1 | 2.542449144 | -1.144236092 | 0.010561471 | 1.976275601 |
| C20orf26 | 3.818949209 | -1.14569577 | 0.000986823 | 3.005760728 |
| LINC00840 | 2.548384704 | -1.145721529 | 0.010454509 | 1.98069638 |
| SSC5D | 5.156017106 | -1.14573539 | 8.51E-05 | 4.070141329 |
| PTPN14 | 7.919419594 | -1.146581536 | 5.31E-07 | 6.274705345 |
| TNFRSF10A | 6.930685136 | -1.146720289 | 3.35E-06 | 5.474756965 |
| PRPF40A | 6.540697686 | -1.147698371 | 6.77E-06 | 5.169448171 |
| UGCG | 8.764665639 | -1.148377943 | 1.10E-07 | 6.958657301 |
| DUSP10 | 6.961117308 | -1.148590659 | 3.19E-06 | 5.496247497 |
| ZSCAN20 | 6.684934778 | -1.148637738 | 5.17E-06 | 5.286272545 |
| DSE | 5.739226514 | -1.14908081 | 2.92E-05 | 4.534709613 |
| LPP | 10.69513623 | -1.14942195 | 3.76E-09 | 8.424678101 |
| CXorf64 | 1.784604553 | -1.149444723 | 0.041761259 | 1.379226416 |
| AMIGO2 | 4.180883385 | -1.149636926 | 0.000510846 | 3.291709968 |
| KIAA0247 | 8.338579022 | -1.150847904 | 2.46E-07 | 6.609844966 |
| CYB5R4 | 5.162049207 | -1.150900709 | 8.43E-05 | 4.074101793 |
| CCNA2 | 5.320948454 | -1.151048227 | 6.29E-05 | 4.201267733 |
| RBM15 | 12.55207982 | -1.151244451 | 1.66E-10 | 9.779421245 |
| PIK3C2G | 3.152970034 | -1.151794596 | 0.00339529 | 2.469123176 |
| GPR4 | 4.541207675 | -1.152037202 | 0.000263981 | 3.578426562 |
| AC024580.1 | 2.695616618 | -1.152408213 | 0.007928979 | 2.10078273 |
| CTD-2568A17.5 | 2.65976368 | -1.152597181 | 0.008479008 | 2.071654953 |
| CDCA7 | 3.543889202 | -1.152956751 | 0.001636082 | 2.786194832 |
| ST14 | 2.834710809 | -1.153148783 | 0.006128841 | 2.212621666 |
| RPL17-C18orf32 | 4.463575015 | -1.153257334 | 0.00030458 | 3.516298152 |
| GJB5 | 4.300626056 | -1.153648131 | 0.000409487 | 3.387760043 |
| COL25A1 | 1.814436831 | -1.15373285 | 0.039635373 | 1.401917047 |
| DDX50P1 | 3.871191495 | -1.153919853 | 0.00089584 | 3.047769362 |
| DCLRE1B | 6.772161675 | -1.154457989 | 4.42E-06 | 5.354479214 |
| MYOT | 2.261311398 | -1.154522916 | 0.017699291 | 1.752044141 |
| XXbac-BPG308K3.5 | 1.75128434 | -1.154922932 | 0.044342051 | 1.353184224 |
| F11R | 8.026199181 | -1.155108652 | 4.37E-07 | 6.359562983 |
| ANKRD10-IT1 | 2.693946347 | -1.15517299 | 0.007949095 | 2.099682317 |
| CREB3L2 | 6.945356764 | -1.155390932 | 3.28E-06 | 5.484592155 |
| RPS11P5 | 2.996217993 | -1.15541931 | 0.00456689 | 2.340379438 |
| ZNF845 | 5.69907082 | -1.155456444 | 3.14E-05 | 4.503543446 |
| DSC2 | 6.586981731 | -1.156076049 | 6.24E-06 | 5.204655752 |
| C20orf197 | 2.60184183 | -1.157178654 | 0.009466691 | 2.023801812 |
| SRGN | 6.543573369 | -1.157283944 | 6.73E-06 | 5.1719368 |
| MMP16 | 6.052510173 | -1.157732155 | 1.65E-05 | 4.781316529 |
| ADAM17 | 5.429134485 | -1.157968786 | 5.13E-05 | 4.290135576 |
| IGSF22 | 6.032012993 | -1.158622487 | 1.71E-05 | 4.767513906 |
| F2 | 2.301546546 | -1.158701805 | 0.016469375 | 1.783322882 |
| PPP1R3B | 5.000315597 | -1.158903009 | 0.000112733 | 3.947947926 |
| ZC3HAV1 | 7.958829302 | -1.159304001 | 4.97E-07 | 6.303285904 |
| NCKAP1L | 6.222286645 | -1.159607192 | 1.21E-05 | 4.918514169 |
| ZWINT | 4.278819158 | -1.160188004 | 0.000427097 | 3.369473776 |
| BTN3A2 | 5.444066678 | -1.16042441 | 4.99E-05 | 4.301530246 |
| PROX2 | 4.21966671 | -1.160538658 | 0.000475984 | 3.322407609 |
| FOXL1 | 5.198492231 | -1.16082891 | 7.88E-05 | 4.103295432 |
| SLC2A10 | 4.596079143 | -1.161010566 | 0.000237752 | 3.623875091 |
| SLC9A3 | 4.097595564 | -1.16119535 | 0.000596721 | 3.224228879 |
| DCLK3 | 2.967615717 | -1.161263266 | 0.0048192 | 2.317025061 |
| RP11-222A11.1 | 2.16814304 | -1.161818988 | 0.021027972 | 1.67720262 |
| CD160 | 3.215168016 | -1.162445343 | 0.003032454 | 2.518205774 |
| GFI1 | 1.803319613 | -1.162835057 | 0.040404559 | 1.393569629 |
| DDX60 | 6.036297056 | -1.162942053 | 1.70E-05 | 4.768788832 |
| RDX | 7.72704508 | -1.163361107 | 7.67E-07 | 6.115168683 |
| XRN2 | 7.262871142 | -1.163839244 | 1.84E-06 | 5.73551576 |
| VRK2 | 6.510116495 | -1.164765405 | 7.13E-06 | 5.146870654 |
| ACP5 | 3.078564038 | -1.165282386 | 0.003901813 | 2.408733509 |
| PGPEP1L | 1.982224949 | -1.165319043 | 0.029479577 | 1.53047876 |
| HLA-F-AS1 | 4.899191179 | -1.165388619 | 0.000135274 | 3.868786586 |
| EMILIN3 | 3.043490244 | -1.165704881 | 0.00416439 | 2.380448651 |
| NETO2 | 5.278711052 | -1.165986289 | 6.81E-05 | 4.166873668 |
| ITPRIP | 8.3448809 | -1.166203179 | 2.43E-07 | 6.614065569 |
| ADAMTS16 | 2.474035911 | -1.166949583 | 0.012007161 | 1.920559671 |
| DUSP5 | 3.926545794 | -1.166959289 | 0.000812247 | 3.090311677 |
| OLAH | 3.007706705 | -1.167478783 | 0.004470041 | 2.349688527 |
| NRP1 | 6.286006729 | -1.167542109 | 1.07E-05 | 4.968995012 |
| RALGAPA1P | 3.317333013 | -1.16762636 | 0.002503731 | 2.601412332 |
| FHAD1 | 4.119804465 | -1.167684299 | 0.000573386 | 3.241552796 |
| CTSW | 2.712901319 | -1.16898563 | 0.00767471 | 2.114938049 |
| ANKRD31 | 3.775259338 | -1.169076607 | 0.001069288 | 2.970905372 |
| ZNF570 | 5.949336395 | -1.170260175 | 1.99E-05 | 4.701188981 |
| PDK4 | 2.765961692 | -1.170500124 | 0.006945667 | 2.15828607 |
| ZBTB16 | 4.727665654 | -1.170543876 | 0.00018604 | 3.73039362 |
| MARVELD1 | 7.192659394 | -1.170836544 | 2.08E-06 | 5.682532372 |
| F2R | 4.91795205 | -1.172234445 | 0.000131995 | 3.879442699 |
| SIGLEC5 | 3.898254127 | -1.172586255 | 0.000853998 | 3.06854307 |
| LGALS3 | 4.221942566 | -1.173101959 | 0.000474207 | 3.324031819 |
| XPR1 | 8.321122605 | -1.173251176 | 2.54E-07 | 6.595579135 |
| ROBO1 | 4.016731251 | -1.173326987 | 0.000689445 | 3.1615001 |
| SERPINB1 | 8.671075122 | -1.173441021 | 1.33E-07 | 6.877349534 |
| RP11-312J18.5 | 2.968679337 | -1.173476133 | 0.004808546 | 2.317986204 |
| NMBR | 3.614154781 | -1.173593586 | 0.001438057 | 2.842223909 |
| CPB1 | 3.659504377 | -1.173809668 | 0.001320134 | 2.87938203 |
| DCT | 2.627404041 | -1.1738197 | 0.009011773 | 2.045189767 |
| AC006024.4 | 2.30625108 | -1.174005032 | 0.016340165 | 1.78674356 |
| PLS3 | 6.782176937 | -1.174770161 | 4.33E-06 | 5.36368392 |
| SLC26A7 | 1.96522699 | -1.175193106 | 0.030351354 | 1.517821935 |
| STC2 | 3.026434721 | -1.175728012 | 0.004300954 | 2.366435165 |
| LXN | 5.946428993 | -1.176301311 | 2.01E-05 | 4.697734633 |
| SUSD2 | 2.751479103 | -1.176687515 | 0.007129475 | 2.14694248 |
| RP11-438H8.8 | 2.966570486 | -1.176844542 | 0.004827315 | 2.316294355 |
| GALNT1 | 7.274680724 | -1.17694164 | 1.80E-06 | 5.745297639 |
| ZDHHC2 | 6.531903246 | -1.176959192 | 6.86E-06 | 5.163706373 |
| LTBP2 | 4.474556121 | -1.177041519 | 0.00029842 | 3.525171692 |
| NRP2 | 5.934929773 | -1.17812362 | 2.05E-05 | 4.688379773 |
| DCDC2 | 2.911042065 | -1.178319394 | 0.005339727 | 2.272480915 |
| CNGA1 | 2.730051011 | -1.17922779 | 0.007423755 | 2.129376361 |
| TSPAN2 | 3.460483855 | -1.179670257 | 0.001911624 | 2.718597525 |
| KLB | 6.088800915 | -1.179723308 | 1.54E-05 | 4.811139411 |
| TMEM159 | 9.207056869 | -1.179904297 | 5.02E-08 | 7.29940556 |
| RGS22 | 2.620610439 | -1.179984762 | 0.009124479 | 2.039791924 |
| RP1-167F1.2 | 3.76523386 | -1.180272486 | 0.00108916 | 2.96290827 |
| ZMYM1 | 8.519964046 | -1.180297085 | 1.74E-07 | 6.758618253 |
| ELL2 | 10.11107447 | -1.180527031 | 1.01E-08 | 7.997041193 |
| C9orf66 | 6.242152726 | -1.180679155 | 1.17E-05 | 4.933621553 |
| KIAA1958 | 7.04986581 | -1.181335123 | 2.71E-06 | 5.567152173 |
| ZNF45 | 7.394420726 | -1.181751232 | 1.42E-06 | 5.846906528 |
| SQRDL | 7.638143515 | -1.183456317 | 9.04E-07 | 6.043648593 |
| SEMA3E | 1.691248041 | -1.183640033 | 0.049243351 | 1.3076524 |
| C9orf106 | 4.346941814 | -1.183834286 | 0.000376825 | 3.423859835 |
| ELL3 | 7.252033788 | -1.184029173 | 1.87E-06 | 5.728353538 |
| ATP8A2P2 | 2.467063893 | -1.185659491 | 0.012170876 | 1.91467818 |
| UBASH3B | 5.745486394 | -1.186031619 | 2.90E-05 | 4.537302084 |
| PRIM2 | 7.742233985 | -1.186683979 | 7.51E-07 | 6.124616202 |
| EIF2AK3 | 5.441187873 | -1.187228502 | 5.01E-05 | 4.300074839 |
| SEPN1 | 10.24922373 | -1.187425426 | 8.10E-09 | 8.091494835 |
| GGACT | 5.760813609 | -1.187908531 | 2.82E-05 | 4.550081746 |
| B4GALT5 | 6.532199328 | -1.188104509 | 6.86E-06 | 5.163706373 |
| HTR1F | 3.044061762 | -1.188601577 | 0.004161601 | 2.380739532 |
| CKAP2 | 6.12851248 | -1.188846194 | 1.44E-05 | 4.842409881 |
| APLNR | 3.48204353 | -1.18908018 | 0.001842604 | 2.734567949 |
| RAD51AP1 | 5.1840541 | -1.189233862 | 8.10E-05 | 4.091579214 |
| PLS1 | 9.202247787 | -1.18934925 | 5.03E-08 | 7.298218001 |
| CTC-260E6.2 | 2.763086476 | -1.189885762 | 0.006983525 | 2.155925302 |
| ZNF137P | 7.11886421 | -1.189976567 | 2.38E-06 | 5.623948221 |
| PDE3A | 6.406381457 | -1.18998825 | 8.63E-06 | 5.064154027 |
| TLK2P1 | 4.126993543 | -1.190582476 | 0.000565816 | 3.247324795 |
| TLR4 | 4.593597905 | -1.190694526 | 0.000239277 | 3.621099626 |
| ADAM21 | 5.953256544 | -1.191128515 | 1.98E-05 | 4.704270739 |
| HMGB1P31 | 2.975783953 | -1.192304537 | 0.004751455 | 2.323173367 |
| RP11-301M17.1 | 3.654125293 | -1.192451108 | 0.001334048 | 2.874828501 |
| CXCL1 | 2.356522206 | -1.19250263 | 0.014939153 | 1.825674014 |
| RLN2 | 3.53988925 | -1.192597695 | 0.001648242 | 2.782979121 |
| RP4-562J12.2 | 4.084300413 | -1.1930588 | 0.000610828 | 3.214081212 |
| C11orf86 | 1.900802376 | -1.193462315 | 0.0339286 | 1.469434054 |
| FAM198B | 5.091892266 | -1.195214414 | 9.46E-05 | 4.024334142 |
| LRRIQ3 | 3.287382193 | -1.195305032 | 0.002653439 | 2.576190889 |
| SEC14L3 | 2.646886039 | -1.195436613 | 0.008688121 | 2.06107412 |
| ACTN1 | 2.558356532 | -1.195634807 | 0.01026322 | 1.988716377 |
| CFH | 6.818396259 | -1.196097025 | 4.07E-06 | 5.390231946 |
| PGM2 | 6.805662415 | -1.197350514 | 4.13E-06 | 5.383823856 |
| CSF2RB | 6.06057441 | -1.197410987 | 1.64E-05 | 4.785801212 |
| UPF3AP1 | 4.228748148 | -1.199420443 | 0.000468068 | 3.329690996 |
| XIRP1 | 2.69025619 | -1.199468996 | 0.008008666 | 2.096439808 |
| CTDSP2 | 5.211887723 | -1.199483961 | 7.73E-05 | 4.111950167 |
| TLR10 | 3.936445558 | -1.199665892 | 0.000798292 | 3.097838468 |
| SYNC | 3.334494984 | -1.200043093 | 0.002423975 | 2.615471848 |
| EMP3 | 2.606573726 | -1.200383993 | 0.009377185 | 2.0279275 |
| METTL24 | 3.790311231 | -1.200516098 | 0.001041251 | 2.982444495 |
| FANCD2 | 6.689783873 | -1.201119786 | 5.14E-06 | 5.289170477 |
| LINC00618 | 2.417711006 | -1.201229153 | 0.013348132 | 1.874579523 |
| LINC00311 | 2.889225056 | -1.202298433 | 0.005555332 | 2.255289967 |
| RP11-262D11.2 | 2.798586157 | -1.202437187 | 0.006549217 | 2.183810635 |
| C19orf40 | 9.146477622 | -1.202443787 | 5.51E-08 | 7.258666194 |
| COL6A2 | 1.923016567 | -1.203082578 | 0.032692269 | 1.485554935 |
| RBBP4 | 6.603058812 | -1.203125563 | 6.05E-06 | 5.218436704 |
| ETV7 | 4.395131731 | -1.203225993 | 0.000345699 | 3.461301869 |
| KLF10 | 5.841450371 | -1.203609417 | 2.43E-05 | 4.614605197 |
| RAPSN | 2.812822399 | -1.20368926 | 0.006375346 | 2.195496245 |
| ZDHHC15 | 6.937230037 | -1.204347938 | 3.33E-06 | 5.477172769 |
| RP11-495P10.1 | 1.902166973 | -1.20463025 | 0.033841407 | 1.470551587 |
| CCL20 | 1.776074255 | -1.204921199 | 0.042435058 | 1.372275196 |
| CFLAR-AS1 | 3.162712516 | -1.205375637 | 0.003338079 | 2.476503345 |
| ANTXR2 | 7.363748633 | -1.205736022 | 1.51E-06 | 5.820540302 |
| PRSS54 | 3.144556171 | -1.206286142 | 0.003452109 | 2.4619155 |
| ASB18 | 2.942675406 | -1.206511425 | 0.005036442 | 2.297876178 |
| RPGRIP1 | 4.580462073 | -1.206791151 | 0.00024557 | 3.609824498 |
| RGS13 | 2.446412679 | -1.207423465 | 0.012659787 | 1.897573603 |
| REL | 6.606783818 | -1.207423465 | 6.01E-06 | 5.221383379 |
| TMEM64 | 8.802889578 | -1.207706731 | 1.03E-07 | 6.987927644 |
| DUSP1 | 3.469010127 | -1.208353708 | 0.001885415 | 2.724592951 |
| TACR1 | 3.633537818 | -1.209041823 | 0.001385641 | 2.85834918 |
| OAS1 | 4.123911831 | -1.20910783 | 0.000569457 | 3.24453899 |
| ADAMTSL1 | 3.085516525 | -1.20955283 | 0.003858848 | 2.413542293 |
| REM1 | 1.974679084 | -1.209727819 | 0.029856469 | 1.524961557 |
| 15-Sep | 10.13884403 | -1.210335339 | 9.78E-09 | 8.00971179 |
| AFAP1L1 | 6.299088333 | -1.211087312 | 1.05E-05 | 4.979289464 |
| RP11-281O15.2 | 3.464764445 | -1.211283673 | 0.001900608 | 2.72110753 |
| CYB5RL | 6.470522508 | -1.211383824 | 7.64E-06 | 5.116791884 |
| RP11-545A16.3 | 4.598781288 | -1.212204056 | 0.00023693 | 3.625380127 |
| KL | 4.975329572 | -1.212497885 | 0.000118212 | 3.927338081 |
| SLC22A20 | 3.990313847 | -1.212567566 | 0.000724374 | 3.140037312 |
| HTR1B | 4.146295025 | -1.212922446 | 0.000545028 | 3.263581463 |
| MB21D1 | 6.579018681 | -1.21308594 | 6.33E-06 | 5.198550553 |
| DMRTA1 | 3.976549981 | -1.213456942 | 0.000742708 | 3.129182175 |
| RSPH4A | 1.87128431 | -1.213768747 | 0.035820856 | 1.445864038 |
| RP11-564C4.6 | 4.842388699 | -1.213871275 | 0.000150019 | 3.823853475 |
| NOX4 | 3.619147641 | -1.21416075 | 0.001424281 | 2.846404171 |
| CYP3A4 | 2.873756924 | -1.214382934 | 0.00571017 | 2.243350943 |
| LGI2 | 5.750511204 | -1.214719301 | 2.88E-05 | 4.541047163 |
| TGM5 | 2.260838624 | -1.214750134 | 0.017712177 | 1.751728045 |
| BST1 | 5.347544247 | -1.216565488 | 5.99E-05 | 4.222387857 |
| ITIH2 | 3.960196726 | -1.216724692 | 0.000765815 | 3.115876122 |
| AQP9 | 3.392991647 | -1.216786938 | 0.002168185 | 2.663903574 |
| CHSY1 | 9.679208856 | -1.217365009 | 2.10E-08 | 7.677744816 |
| BNC2 | 5.877835143 | -1.217504751 | 2.26E-05 | 4.645002988 |
| CTC-301O7.4 | 3.840034277 | -1.217878388 | 0.000948176 | 3.023110849 |
| ZNF560 | 1.754131844 | -1.217962063 | 0.044127808 | 1.355287645 |
| SYNM | 7.636404127 | -1.218190713 | 9.06E-07 | 6.04266268 |
| C5AR1 | 3.069347325 | -1.218219862 | 0.00396695 | 2.401543281 |
| RP11-389K14.3 | 1.8762929 | -1.218371616 | 0.035499725 | 1.449775016 |
| NT5C3AP1 | 2.905116818 | -1.218647709 | 0.005399978 | 2.267608037 |
| TBX21 | 3.449675997 | -1.219002035 | 0.00195298 | 2.709302112 |
| RP11-343H5.4 | 2.110544437 | -1.219019907 | 0.02332702 | 1.632140733 |
| KLF11 | 6.146738279 | -1.220427024 | 1.39E-05 | 4.857789586 |
| AC004980.10 | 2.199781441 | -1.220663965 | 0.019856202 | 1.702103817 |
| SAMHD1 | 11.56556404 | -1.220768627 | 8.33E-10 | 9.079252084 |
| PLEKHG1 | 5.715062307 | -1.221305517 | 3.06E-05 | 4.514328807 |
| PTCRA | 1.957709806 | -1.221418565 | 0.030767132 | 1.511912984 |
| HCG4P7 | 1.939264465 | -1.221760151 | 0.031781961 | 1.497819308 |
| TMEM61 | 2.609939272 | -1.222137888 | 0.009315954 | 2.030772685 |
| GCOM1 | 2.02317568 | -1.2228617 | 0.027342565 | 1.563160752 |
| ART5 | 3.102902239 | -1.222913532 | 0.00374261 | 2.426825448 |
| CASS4 | 6.847774696 | -1.223568145 | 3.89E-06 | 5.410500424 |
| RARRES1 | 4.221759097 | -1.223765798 | 0.000474207 | 3.324031819 |
| SLC14A2 | 2.153521329 | -1.224636677 | 0.021580471 | 1.665939075 |
| HK2 | 5.558137436 | -1.224783477 | 4.04E-05 | 4.393560514 |
| FTH1P7 | 1.781134191 | -1.224791405 | 0.042038871 | 1.376348959 |
| SLC22A7 | 4.380651153 | -1.224803217 | 0.000354449 | 3.450446036 |
| SULT1B1 | 6.521885201 | -1.225435599 | 6.98E-06 | 5.156146705 |
| AK7 | 2.556306465 | -1.225816825 | 0.010303724 | 1.98700579 |
| CA12 | 3.729045423 | -1.226417091 | 0.00115863 | 2.936055245 |
| PAXIP1-AS2 | 5.268329537 | -1.22650756 | 6.93E-05 | 4.159221029 |
| F3 | 4.56373319 | -1.227125408 | 0.000252671 | 3.597444008 |
| CTTNBP2NL | 8.274678181 | -1.227986318 | 2.78E-07 | 6.55661905 |
| KBTBD8 | 6.810357912 | -1.228038413 | 4.13E-06 | 5.38418713 |
| EHD4 | 9.173046669 | -1.228905217 | 5.25E-08 | 7.279666299 |
| KCNJ5 | 4.163341072 | -1.230151258 | 0.000527598 | 3.277696678 |
| SUSD5 | 4.235580826 | -1.230197348 | 0.000462462 | 3.334923605 |
| NBPF13P | 5.741356592 | -1.230272872 | 2.91E-05 | 4.5363682 |
| SLC45A2 | 2.194322989 | -1.230391459 | 0.020047574 | 1.697938178 |
| FETUB | 4.234786507 | -1.230392333 | 0.00046287 | 3.334540636 |
| CENPN | 9.714257402 | -1.230890613 | 1.97E-08 | 7.705384934 |
| SLC3A1 | 4.312423118 | -1.232425761 | 0.000401437 | 3.396382812 |
| CHRNA5 | 6.694715826 | -1.232618469 | 5.11E-06 | 5.291717866 |
| MMP21 | 2.876097732 | -1.232656429 | 0.005685866 | 2.24520336 |
| FBXO32 | 3.882281034 | -1.233664115 | 0.000877251 | 3.05687607 |
| VCL | 6.859946093 | -1.233884309 | 3.79E-06 | 5.421028259 |
| CDC20 | 3.087145037 | -1.233955643 | 0.003845361 | 2.41506292 |
| MAPK1IP1L | 6.337573221 | -1.234387852 | 9.81E-06 | 5.008549171 |
| RP13-766D20.2 | 2.177286948 | -1.234837739 | 0.020668721 | 1.684686398 |
| ZNF812 | 2.635406462 | -1.234971205 | 0.008874024 | 2.051879379 |
| RPL17P50 | 2.422829932 | -1.235142661 | 0.013223337 | 1.878658945 |
| LINC00284 | 4.542240341 | -1.235334276 | 0.000263192 | 3.579727501 |
| RAD51 | 5.049132149 | -1.235578152 | 0.000102849 | 3.987798495 |
| EFNB2 | 7.399363317 | -1.236111567 | 1.41E-06 | 5.850430688 |
| ANKEF1 | 5.05395177 | -1.236669568 | 0.000101883 | 3.991898426 |
| ZBP1 | 2.836773828 | -1.236681905 | 0.006113279 | 2.213725798 |
| SPN | 7.079411429 | -1.237063851 | 2.55E-06 | 5.593175986 |
| MS4A7 | 3.990310273 | -1.237190584 | 0.000724374 | 3.140037312 |
| OR52K3P | 2.325603265 | -1.237304306 | 0.015773625 | 1.802068475 |
| FNIP2 | 7.815595041 | -1.237619852 | 6.49E-07 | 6.188015882 |
| LCP1 | 8.051894962 | -1.238945733 | 4.15E-07 | 6.382031712 |
| HERC3 | 4.893743271 | -1.240192738 | 0.000136725 | 3.864151085 |
| PLVAP | 2.647959173 | -1.240800058 | 0.008675479 | 2.061706524 |
| TRAM1 | 6.281034014 | -1.241709288 | 1.08E-05 | 4.966357642 |
| LECT1 | 4.150785479 | -1.242132573 | 0.000540771 | 3.266986604 |
| WNT8B | 3.89681029 | -1.242210379 | 0.000856538 | 3.067253441 |
| LIMD1 | 5.517683781 | -1.242786346 | 4.36E-05 | 4.3604437 |
| ATF3 | 2.159081467 | -1.243006971 | 0.021350546 | 1.670591016 |
| YAP1 | 8.036897375 | -1.243562308 | 4.29E-07 | 6.367708196 |
| RND3 | 5.13679286 | -1.244252411 | 8.76E-05 | 4.057587353 |
| MIR181A1HG | 3.39217693 | -1.244740749 | 0.00216975 | 2.663590232 |
| SLC5A3 | 6.048452561 | -1.245178387 | 1.66E-05 | 4.778691951 |
| AGPAT9 | 4.077385478 | -1.245327762 | 0.000617332 | 3.209481074 |
| MAML3 | 7.281449645 | -1.245353089 | 1.77E-06 | 5.751115637 |
| ZNF197-AS1 | 4.427200636 | -1.24543659 | 0.00032508 | 3.488009137 |
| AC013472.3 | 1.795865738 | -1.24606473 | 0.040937894 | 1.387874499 |
| AC093609.1 | 3.697479873 | -1.246937768 | 0.001231485 | 2.909570711 |
| ARID5B | 7.416642419 | -1.248065683 | 1.36E-06 | 5.866584306 |
| UTS2B | 4.447603494 | -1.248200074 | 0.00031346 | 3.503817602 |
| TNIP3 | 2.557210379 | -1.24850362 | 0.010284311 | 1.987824805 |
| CYP4F12 | 2.75808058 | -1.249059977 | 0.007040107 | 2.152420719 |
| IGF1 | 10.23946689 | -1.249804542 | 8.23E-09 | 8.084858456 |
| RP11-292F9.1 | 2.522228338 | -1.249961023 | 0.010960697 | 1.960161832 |
| MPZL3 | 7.150597265 | -1.250096379 | 2.26E-06 | 5.64579633 |
| CTD-2561J22.2 | 5.491132826 | -1.250972503 | 4.59E-05 | 4.338358183 |
| C20orf195 | 2.951063889 | -1.251665367 | 0.004957266 | 2.304757755 |
| ADAMTS20 | 1.940870087 | -1.251854791 | 0.031700671 | 1.49893154 |
| ZNF724P | 4.164892438 | -1.252042766 | 0.000526145 | 3.278894287 |
| AP000695.6 | 2.405951473 | -1.252152407 | 0.013661743 | 1.864493878 |
| RP11-386I23.1 | 1.874482776 | -1.253272295 | 0.03561795 | 1.44833108 |
| NXF5 | 2.647675817 | -1.253622081 | 0.008678111 | 2.061574824 |
| SLC2A3P2 | 3.776557229 | -1.254007342 | 0.001066817 | 2.971909972 |
| SLC23A3 | 5.26714751 | -1.254234004 | 6.95E-05 | 4.158200207 |
| NME2P1 | 2.853536874 | -1.254266203 | 0.005929037 | 2.227015803 |
| SPC24 | 4.366032945 | -1.254353154 | 0.000363767 | 3.439177188 |
| CHODL | 4.657553553 | -1.254821947 | 0.000212741 | 3.672148101 |
| SH3GLB1 | 10.91547648 | -1.254946115 | 2.53E-09 | 8.59768532 |
| VTCN1 | 2.877424679 | -1.255553585 | 0.005677465 | 2.245845543 |
| CLIC1 | 5.630550837 | -1.2555779 | 3.56E-05 | 4.448775879 |
| AC011242.6 | 6.71281234 | -1.255802493 | 4.96E-06 | 5.304616382 |
| ZSCAN23 | 4.890944688 | -1.256097643 | 0.000137407 | 3.861990931 |
| ACMSD | 2.994413356 | -1.256102005 | 0.004581541 | 2.33898845 |
| LSP1 | 6.275049644 | -1.256546042 | 1.09E-05 | 4.961065698 |
| ECT2 | 8.74015111 | -1.256782489 | 1.16E-07 | 6.937029099 |
| LINC00945 | 2.729975267 | -1.256924475 | 0.007423755 | 2.129376361 |
| RBMS1 | 7.111428956 | -1.257426856 | 2.41E-06 | 5.618018173 |
| TMEM184A | 2.142957832 | -1.257451148 | 0.022015629 | 1.657268898 |
| KLF6 | 6.462888998 | -1.258030742 | 7.71E-06 | 5.112754266 |
| SLC6A20 | 1.99240204 | -1.258225939 | 0.028945916 | 1.538412707 |
| GALR1 | 2.953300557 | -1.258446968 | 0.004937672 | 2.306477791 |
| MAGEE2 | 4.280585662 | -1.258463663 | 0.000425655 | 3.370942518 |
| FEM1C | 10.5993819 | -1.25926342 | 4.43E-09 | 8.353452513 |
| RP6-206I17.3 | 4.286885769 | -1.259438998 | 0.000420869 | 3.375853494 |
| MCM2 | 5.661434087 | -1.260284698 | 3.38E-05 | 4.470754223 |
| FZD6 | 7.895304142 | -1.261062517 | 5.58E-07 | 6.253109324 |
| SP140L | 6.525072489 | -1.261336308 | 6.93E-06 | 5.159435091 |
| ZNF367 | 5.550667607 | -1.261662567 | 4.09E-05 | 4.388666155 |
| PARP14 | 8.193791424 | -1.261967214 | 3.19E-07 | 6.4961743 |
| PIK3R5 | 6.577218901 | -1.262022799 | 6.34E-06 | 5.198003927 |
| XRCC2 | 5.208451897 | -1.262976625 | 7.79E-05 | 4.108715597 |
| SDC2 | 7.317138374 | -1.264172942 | 1.66E-06 | 5.781107391 |
| PTGER3 | 4.52973277 | -1.264418357 | 0.000268069 | 3.571753569 |
| LGALS12 | 3.555415156 | -1.264924947 | 0.001603381 | 2.794963261 |
| NFATC2 | 5.346346992 | -1.265067319 | 5.99E-05 | 4.22233631 |
| IFNE | 2.889341471 | -1.265925816 | 0.005555102 | 2.255307972 |
| MYLK | 5.100250674 | -1.266123702 | 9.34E-05 | 4.029781323 |
| SP7 | 6.871877372 | -1.26614174 | 3.71E-06 | 5.430648616 |
| C2orf16 | 9.020584156 | -1.266826163 | 7.05E-08 | 7.151814047 |
| RIBC2 | 2.834506848 | -1.268254698 | 0.006130366 | 2.212513573 |
| PLP2 | 5.710808925 | -1.268867643 | 3.08E-05 | 4.512021174 |
| RP3-508I15.19 | 4.354943852 | -1.268974471 | 0.000372095 | 3.429346124 |
| WDR3 | 5.38535154 | -1.26910116 | 5.60E-05 | 4.252039254 |
| MAGEA12 | 4.386948524 | -1.269463361 | 0.000350122 | 3.455780225 |
| DNASE2B | 3.882659116 | -1.269940086 | 0.000877106 | 3.056947724 |
| HRH2 | 3.487974711 | -1.270120477 | 0.001822974 | 2.73921951 |
| RELL1 | 5.009584204 | -1.27038119 | 0.000111023 | 3.954586385 |
| GZMB | 5.787668755 | -1.270897452 | 2.69E-05 | 4.570317018 |
| GOLGA6A | 4.787656681 | -1.271207052 | 0.000166525 | 3.778521084 |
| KCNJ2 | 5.195686066 | -1.271749466 | 7.92E-05 | 4.10141322 |
| TTC26 | 8.117818648 | -1.272249588 | 3.65E-07 | 6.437169513 |
| ZNF215 | 4.170534388 | -1.272575427 | 0.000520699 | 3.283413574 |
| ZNF556 | 4.670022024 | -1.272650946 | 0.000207998 | 3.681940084 |
| TNFSF13B | 2.915439369 | -1.273268286 | 0.005304569 | 2.275349893 |
| MLF1IP | 5.143906207 | -1.274243893 | 8.68E-05 | 4.061481039 |
| HTR7 | 6.060297694 | -1.27452022 | 1.64E-05 | 4.785801212 |
| SEC22B | 6.926156714 | -1.27514602 | 3.39E-06 | 5.469356566 |
| GPR21 | 4.082583679 | -1.275561121 | 0.000612335 | 3.213011158 |
| AHCTF1P1 | 4.167142362 | -1.275764965 | 0.000524475 | 3.280275259 |
| PXDNL | 3.053061001 | -1.275770622 | 0.004100451 | 2.387168363 |
| SGK1 | 5.200199368 | -1.275899836 | 7.87E-05 | 4.103814592 |
| BVES | 7.256032566 | -1.276343337 | 1.86E-06 | 5.729952746 |
| BGN | 4.430714355 | -1.277106091 | 0.000323212 | 3.490511882 |
| AC110781.3 | 2.181853325 | -1.277126527 | 0.020509614 | 1.688042509 |
| FOXP2 | 4.846461117 | -1.277379935 | 0.000148342 | 3.828734833 |
| GPR64 | 2.056563178 | -1.277679906 | 0.025737514 | 1.589433405 |
| TMEM200A | 3.461904708 | -1.277987166 | 0.001908704 | 2.71926135 |
| CD97 | 9.889905932 | -1.278085508 | 1.44E-08 | 7.841288509 |
| C19orf69 | 3.318306459 | -1.278105103 | 0.002500057 | 2.602050136 |
| FOXD2 | 5.75827533 | -1.278351213 | 2.83E-05 | 4.547950906 |
| MIR4435-1HG | 3.180932481 | -1.278667091 | 0.003233722 | 2.490297381 |
| ICAM4 | 3.07988203 | -1.279129524 | 0.0038958 | 2.409403396 |
| EMR3 | 2.610409941 | -1.279203377 | 0.009307723 | 2.031156532 |
| HLA-DPA1 | 2.864601647 | -1.280014943 | 0.005805716 | 2.236144225 |
| PLEK2 | 2.599558092 | -1.280511376 | 0.009510911 | 2.02177786 |
| TMEM30B | 4.969942103 | -1.280571138 | 0.000118908 | 3.924787583 |
| ARSD-AS1 | 3.089010627 | -1.280966451 | 0.003832667 | 2.416498861 |
| TMEM37 | 6.471147847 | -1.28098164 | 7.64E-06 | 5.116791884 |
| BFSP2 | 2.103850542 | -1.281146022 | 0.023614527 | 1.626820741 |
| AC112229.4 | 2.783998592 | -1.281659286 | 0.006729155 | 2.172039473 |
| MYH11 | 3.173082607 | -1.282201562 | 0.003279997 | 2.484126545 |
| MECOM | 6.438210022 | -1.282361574 | 8.12E-06 | 5.090594305 |
| ITPRIPL2 | 7.503206755 | -1.282598126 | 1.17E-06 | 5.932069826 |
| MS4A6A | 2.925905545 | -1.282714548 | 0.005198483 | 2.284123412 |
| GNB4 | 6.003152859 | -1.282881849 | 1.80E-05 | 4.744841333 |
| AR | 6.17855251 | -1.283476183 | 1.31E-05 | 4.883542057 |
| CLDN2 | 1.781440386 | -1.28474295 | 0.042026102 | 1.376480887 |
| HS2ST1 | 9.850903239 | -1.285519132 | 1.55E-08 | 7.810256289 |
| SLC9A7P1 | 5.676660334 | -1.28555482 | 3.29E-05 | 4.482437421 |
| OTX1 | 2.956523327 | -1.28592854 | 0.004909188 | 2.308990361 |
| TGFBI | 2.474519213 | -1.287104969 | 0.012000303 | 1.920807772 |
| GPR114 | 5.612820678 | -1.287144743 | 3.68E-05 | 4.434410017 |
| C1orf127 | 3.355972368 | -1.287150658 | 0.002325612 | 2.633462722 |
| HERC5 | 5.983823968 | -1.287231597 | 1.87E-05 | 4.728470946 |
| DLEU2L | 3.432005678 | -1.28803337 | 0.002018879 | 2.69488981 |
| CXCR4 | 6.837697626 | -1.288047442 | 3.93E-06 | 5.405159336 |
| FHL5 | 4.971336424 | -1.288370314 | 0.000118908 | 3.924787583 |
| IQCH | 11.43557584 | -1.288743751 | 1.03E-09 | 8.988090392 |
| ZNF347 | 8.552148516 | -1.289146646 | 1.65E-07 | 6.783267989 |
| PIK3AP1 | 7.653246784 | -1.289934387 | 8.82E-07 | 6.054504221 |
| TAC4 | 3.193946151 | -1.290328939 | 0.003149649 | 2.501737783 |
| AC092675.3 | 3.046148501 | -1.290708645 | 0.004151049 | 2.381842117 |
| AC072062.1 | 3.198801476 | -1.290801151 | 0.003121106 | 2.505691507 |
| ZBED6CL | 5.316757869 | -1.290998509 | 6.32E-05 | 4.199450646 |
| PCDHB11 | 4.116359124 | -1.291165037 | 0.000577459 | 3.2384785 |
| TBC1D8B | 5.379095964 | -1.292080984 | 5.67E-05 | 4.246691152 |
| NR2F2 | 2.742211672 | -1.292159309 | 0.00725653 | 2.139270985 |
| RP11-108F13.2 | 2.059395647 | -1.293002616 | 0.025625579 | 1.591326315 |
| AF131215.5 | 3.006148366 | -1.29384992 | 0.004482698 | 2.348460494 |
| ADPRH | 9.997021133 | -1.293999636 | 1.22E-08 | 7.913007577 |
| FOSL1 | 3.419670534 | -1.294142622 | 0.002067536 | 2.684546928 |
| DCN | 7.09353949 | -1.295104234 | 2.48E-06 | 5.604674969 |
| PLA1A | 5.59792536 | -1.295489529 | 3.75E-05 | 4.426219655 |
| DNAJC5B | 3.680832977 | -1.295809499 | 0.001268268 | 2.896789006 |
| EFCAB5 | 3.836378665 | -1.295945307 | 0.000954538 | 3.020206814 |
| LHFPL2 | 9.66341111 | -1.295985803 | 2.16E-08 | 7.666002932 |
| HOXB2 | 1.687096329 | -1.296562937 | 0.049633584 | 1.304224362 |
| RP11-66B24.2 | 3.676159542 | -1.296976457 | 0.001278987 | 2.893133934 |
| TAL2 | 4.508482318 | -1.297609425 | 0.000279162 | 3.554144184 |
| CASP8 | 10.42697511 | -1.297729991 | 6.01E-09 | 8.220826948 |
| C1QTNF7 | 6.309480195 | -1.297852238 | 1.03E-05 | 4.986439756 |
| CYSLTR2 | 4.538751528 | -1.299758065 | 0.000264515 | 3.577549557 |
| FCRL6 | 3.154479698 | -1.300507459 | 0.003386952 | 2.470190986 |
| HEYL | 3.602658456 | -1.300780164 | 0.001467946 | 2.833289813 |
| CASZ1 | 5.787052427 | -1.300837358 | 2.69E-05 | 4.570317018 |
| IL1R1 | 2.312136676 | -1.301070602 | 0.016168084 | 1.791341452 |
| TLR6 | 7.821153802 | -1.301160673 | 6.42E-07 | 6.192759874 |
| IGBP1P1 | 2.981865391 | -1.301342931 | 0.004697945 | 2.328092079 |
| C8orf86 | 4.070102123 | -1.30134654 | 0.000626442 | 3.203119444 |
| DTX3L | 10.00398334 | -1.301882218 | 1.21E-08 | 7.918480242 |
| CARD6 | 12.44078871 | -1.302053301 | 2.02E-10 | 9.694199645 |
| PMEL | 5.156147256 | -1.303054161 | 8.51E-05 | 4.070141329 |
| PTPN22 | 4.32763312 | -1.303280839 | 0.000390303 | 3.408597605 |
| OIP5 | 5.646033451 | -1.303405988 | 3.46E-05 | 4.460742544 |
| HTR7P1 | 6.099175011 | -1.304255835 | 1.52E-05 | 4.819211389 |
| PGLYRP1 | 2.825038577 | -1.304538665 | 0.006233872 | 2.205242125 |
| SIX2 | 2.639289835 | -1.305344427 | 0.008803912 | 2.055324291 |
| PRF1 | 5.065921454 | -1.306047099 | 9.97E-05 | 4.001219434 |
| FNDC3B | 8.550995499 | -1.306147003 | 1.65E-07 | 6.783267989 |
| SKAP2 | 7.195682491 | -1.306322415 | 2.07E-06 | 5.684445732 |
| ACTA2 | 2.659378429 | -1.306708511 | 0.00848403 | 2.071397787 |
| CDK4 | 2.23523054 | -1.306848627 | 0.018590191 | 1.730716157 |
| HIST2H2BA | 4.817422329 | -1.307229748 | 0.000157232 | 3.803458387 |
| ENPP1 | 5.74236083 | -1.307234699 | 2.91E-05 | 4.5363682 |
| TRIM55 | 4.409674253 | -1.307431302 | 0.000335661 | 3.47409974 |
| CD300LF | 5.613652912 | -1.307516851 | 3.67E-05 | 4.435503666 |
| RP1-34B20.4 | 3.344095116 | -1.307993452 | 0.002379507 | 2.623512947 |
| FCGR3B | 2.735023616 | -1.308276597 | 0.007356425 | 2.133333181 |
| RPS17L | 6.316650097 | -1.308344753 | 1.02E-05 | 4.990205295 |
| TMED5 | 8.583138791 | -1.308654681 | 1.56E-07 | 6.807215911 |
| AHSG | 4.409383524 | -1.309196379 | 0.000336371 | 3.473182006 |
| FZD5 | 9.104535743 | -1.309519802 | 6.00E-08 | 7.221742216 |
| AURKA | 9.351000034 | -1.309785183 | 3.90E-08 | 7.408554174 |
| ALG10 | 6.560542783 | -1.311034623 | 6.53E-06 | 5.185186592 |
| PARPBP | 7.460163641 | -1.311096748 | 1.26E-06 | 5.897937547 |
| CDC42EP3 | 6.878416235 | -1.311280885 | 3.66E-06 | 5.436545939 |
| DUSP6 | 6.462249538 | -1.31147969 | 7.73E-06 | 5.112006056 |
| C2orf40 | 4.006229353 | -1.311874608 | 0.000703196 | 3.15292355 |
| PCDH18 | 6.754599506 | -1.312438888 | 4.59E-06 | 5.338644159 |
| EIF4BP7 | 4.347500535 | -1.312759172 | 0.000376652 | 3.42405938 |
| RP11-1148L6.5 | 4.267657036 | -1.313822684 | 0.000436598 | 3.359918555 |
| DOCK11 | 8.468092762 | -1.315687144 | 1.93E-07 | 6.714995188 |
| CHMP4C | 4.905852773 | -1.315799626 | 0.000133731 | 3.873766969 |
| AC009299.5 | 3.901420108 | -1.316008673 | 0.000849609 | 3.070780732 |
| ZNF436 | 8.494592503 | -1.31665107 | 1.83E-07 | 6.737417404 |
| CCRN4L | 8.231556395 | -1.316732519 | 2.97E-07 | 6.526822465 |
| NTF3 | 2.095189336 | -1.316900888 | 0.023987917 | 1.620007455 |
| HLA-H | 2.987354372 | -1.31749872 | 0.004647763 | 2.332756055 |
| ACTR3 | 7.713043971 | -1.317500834 | 7.86E-07 | 6.104800411 |
| CXCR2 | 4.281364366 | -1.317890706 | 0.000425024 | 3.371586322 |
| RP3-425P12.4 | 1.821683505 | -1.317907289 | 0.039133991 | 1.407445863 |
| TEX26-AS1 | 2.208049683 | -1.318254139 | 0.019543244 | 1.709003336 |
| LILRB3 | 3.521870016 | -1.318478628 | 0.001706771 | 2.767824695 |
| C21orf90 | 1.851264793 | -1.319013473 | 0.037090267 | 1.430740036 |
| KLRD1 | 3.054658326 | -1.319464511 | 0.00408839 | 2.388447718 |
| ST13P5 | 3.699813373 | -1.319492134 | 0.001225285 | 2.911762962 |
| NR5A1 | 1.770119104 | -1.320537545 | 0.042900745 | 1.367535168 |
| CYBB | 5.922293108 | -1.320755404 | 2.10E-05 | 4.678077878 |
| ZAR1 | 2.222395785 | -1.322617311 | 0.019047457 | 1.720163006 |
| GBE1 | 8.455217162 | -1.322973244 | 1.98E-07 | 6.703803335 |
| GRIN3B | 3.752150585 | -1.324211866 | 0.001111689 | 2.954016879 |
| AC017048.4 | 2.048747481 | -1.324402485 | 0.026088097 | 1.583557608 |
| NEK6 | 9.991382354 | -1.324540269 | 1.23E-08 | 7.911486214 |
| VANGL1 | 8.969127377 | -1.324639241 | 7.61E-08 | 7.118556782 |
| ZNF792 | 9.57591861 | -1.325018745 | 2.56E-08 | 7.591013888 |
| PLXDC2 | 8.915830638 | -1.325282726 | 8.30E-08 | 7.081123697 |
| RIPK3 | 6.942929345 | -1.325333717 | 3.29E-06 | 5.483409862 |
| ADRA2B | 6.571939488 | -1.326328871 | 6.39E-06 | 5.194752826 |
| AHSP | 2.097681804 | -1.32638504 | 0.023876927 | 1.622021576 |
| RHO | 3.40152412 | -1.326581226 | 0.002138856 | 2.669818438 |
| GPX2 | 3.221339136 | -1.326748037 | 0.002999887 | 2.5228951 |
| CD68 | 4.393378352 | -1.327926409 | 0.000346088 | 3.460813626 |
| RP11-288L9.1 | 2.325709662 | -1.327985677 | 0.015772532 | 1.802098579 |
| PDLIM4 | 3.094166201 | -1.328157837 | 0.00379873 | 2.42036154 |
| VNN2 | 5.572686946 | -1.328164517 | 3.92E-05 | 4.406180551 |
| LCP2 | 7.164611039 | -1.328338388 | 2.19E-06 | 5.65879342 |
| SH3RF2 | 2.985592184 | -1.328846638 | 0.004662227 | 2.331406579 |
| IFI44L | 5.371666829 | -1.329928377 | 5.73E-05 | 4.241643023 |
| IFI30 | 3.433692396 | -1.329981576 | 0.002012213 | 2.696326156 |
| IL18R1 | 5.337559283 | -1.330194046 | 6.09E-05 | 4.215220618 |
| RPL35P5 | 4.898952477 | -1.330257729 | 0.000135274 | 3.868786586 |
| ABO | 4.463745915 | -1.331532553 | 0.00030458 | 3.516298152 |
| SLC18A1 | 2.102835477 | -1.332806967 | 0.023662311 | 1.625942844 |
| IGSF3 | 6.012548315 | -1.333410382 | 1.77E-05 | 4.752463532 |
| RP11-723O4.6 | 3.376544469 | -1.333413179 | 0.002237292 | 2.650277393 |
| RAC2 | 5.489574156 | -1.333519361 | 4.60E-05 | 4.337340402 |
| ST8SIA4 | 7.947904828 | -1.334302494 | 5.07E-07 | 6.294691222 |
| FAM194A | 3.238783476 | -1.334550347 | 0.002901618 | 2.537359827 |
| FGL2 | 6.648530314 | -1.334628433 | 5.59E-06 | 5.252908215 |
| CDK2 | 7.375244617 | -1.334797576 | 1.48E-06 | 5.829540962 |
| LINC00702 | 1.98932361 | -1.334861194 | 0.029086481 | 1.536308822 |
| AC114877.3 | 2.811876015 | -1.335352424 | 0.006385084 | 2.194833392 |
| HLA-J | 7.054832004 | -1.33606039 | 2.68E-06 | 5.57163798 |
| OR2L2 | 3.597448801 | -1.336467276 | 0.001481992 | 2.829154181 |
| GAPDHP1 | 1.725957168 | -1.336926686 | 0.046369844 | 1.333764367 |
| EDAR | 3.551804534 | -1.337240659 | 0.001613343 | 2.792273342 |
| TTF2 | 10.50766351 | -1.337779331 | 5.23E-09 | 8.281747353 |
| MX2 | 5.119620664 | -1.338271566 | 9.03E-05 | 4.044492439 |
| SLC39A14 | 8.813091963 | -1.338555913 | 1.02E-07 | 6.993301065 |
| HCG22 | 4.337810327 | -1.33878932 | 0.000382843 | 3.416979643 |
| BTN2A3P | 4.267767417 | -1.33892068 | 0.000436598 | 3.359918555 |
| GCLM | 11.58212425 | -1.338943838 | 8.16E-10 | 9.088457842 |
| BACE2 | 9.534484117 | -1.339404561 | 2.77E-08 | 7.557076443 |
| RP11-495P10.2 | 2.199184597 | -1.33948941 | 0.019876923 | 1.701650835 |
| CDC25C | 5.481083997 | -1.33983829 | 4.67E-05 | 4.330667874 |
| GJA5 | 4.250698812 | -1.340512459 | 0.000450317 | 3.346481177 |
| KLF5 | 6.793138424 | -1.340545093 | 4.23E-06 | 5.37374172 |
| CD6 | 5.212057187 | -1.340582727 | 7.73E-05 | 4.111950167 |
| TGFBR2 | 8.132541942 | -1.341124224 | 3.56E-07 | 6.448354361 |
| CENPK | 5.774531174 | -1.341181777 | 2.75E-05 | 4.561326145 |
| HCP5 | 6.028257012 | -1.341310772 | 1.72E-05 | 4.764630057 |
| SIGLEC9 | 5.808160514 | -1.342154786 | 2.59E-05 | 4.58635093 |
| RPL5P34 | 4.336034536 | -1.342202174 | 0.000384173 | 3.415472698 |
| ZC3HAV1L | 6.882175739 | -1.342222531 | 3.64E-06 | 5.438578706 |
| PLA2G4A | 8.231607361 | -1.343121086 | 2.97E-07 | 6.526822465 |
| TRIM6 | 8.011996788 | -1.34339139 | 4.50E-07 | 6.34715828 |
| FBLIM1 | 3.429161984 | -1.345620278 | 0.002029228 | 2.692669238 |
| ELK3 | 8.974744472 | -1.346126634 | 7.60E-08 | 7.119369307 |
| CCDC89 | 3.812269484 | -1.346362044 | 0.000998382 | 3.000703268 |
| HLA-DPB2 | 3.114386909 | -1.346438374 | 0.003662315 | 2.43624427 |
| MLTK | 7.444703841 | -1.346582262 | 1.30E-06 | 5.887320594 |
| AHR | 6.303786637 | -1.347156382 | 1.04E-05 | 4.98124134 |
| HSPD1P1 | 3.034712009 | -1.347263094 | 0.004236138 | 2.37302987 |
| RP1-223B1.1 | 2.504107259 | -1.347263094 | 0.011331937 | 1.945695858 |
| RCAN1 | 3.102681828 | -1.347885928 | 0.003743045 | 2.426774954 |
| RP11-93B14.6 | 3.005958669 | -1.348062905 | 0.004482698 | 2.348460494 |
| PCDHA7 | 2.899624313 | -1.348073082 | 0.005458532 | 2.262924129 |
| FSIP2 | 5.03412777 | -1.348706428 | 0.000105842 | 3.975341853 |
| SCN5A | 2.57048822 | -1.348727224 | 0.010038162 | 1.998345781 |
| FGF10 | 1.917347026 | -1.348999677 | 0.033007638 | 1.481385558 |
| LMNB1 | 6.270504629 | -1.349512847 | 1.10E-05 | 4.95746621 |
| AC005682.5 | 4.427555255 | -1.350258243 | 0.00032508 | 3.488009137 |
| SLC22A13 | 2.991861125 | -1.35040139 | 0.004605253 | 2.336746538 |
| NXF3 | 5.003122964 | -1.350684473 | 0.00011239 | 3.949272006 |
| GNRHR | 4.645146603 | -1.350766231 | 0.000216997 | 3.663547147 |
| COL2A1 | 2.30128796 | -1.353126749 | 0.016476322 | 1.783139738 |
| CASC5 | 4.786124406 | -1.35396604 | 0.000167456 | 3.776098395 |
| SLC16A4 | 7.849886762 | -1.354257831 | 6.06E-07 | 6.217632455 |
| IGFBP1 | 2.924691349 | -1.355475862 | 0.005209428 | 2.28320999 |
| HTRA3 | 3.051934626 | -1.355732913 | 0.004109098 | 2.386253481 |
| AL391421.1 | 2.716731624 | -1.355914214 | 0.007616855 | 2.118224297 |
| MSTN | 2.370833276 | -1.356192292 | 0.014553758 | 1.837024842 |
| RBM12B-AS1 | 8.302262787 | -1.356306824 | 2.65E-07 | 6.577211779 |
| HILPDA | 2.685429276 | -1.356765385 | 0.008071013 | 2.093071928 |
| CISH | 3.062529461 | -1.356949697 | 0.004023804 | 2.395363187 |
| AC073343.1 | 6.534707979 | -1.357120571 | 6.85E-06 | 5.164531466 |
| SLX4IP | 5.356212625 | -1.357631435 | 5.90E-05 | 4.229346472 |
| hsa-mir-7162 | 3.189944684 | -1.358925318 | 0.003176332 | 2.498074101 |
| SDC1 | 1.806948528 | -1.359068862 | 0.040159 | 1.396217112 |
| ELTD1 | 7.569546908 | -1.359077071 | 1.03E-06 | 5.985403967 |
| C6orf141 | 2.213686401 | -1.359776415 | 0.019349936 | 1.713320459 |
| CRB2 | 6.924105689 | -1.360046565 | 3.39E-06 | 5.469356566 |
| IRF1 | 6.360728548 | -1.360490519 | 9.40E-06 | 5.026918718 |
| RP5-1043L13.1 | 2.382121609 | -1.361448263 | 0.014252173 | 1.846118906 |
| NLRP14 | 4.00691075 | -1.364696572 | 0.000702825 | 3.153152537 |
| DKK2 | 4.91326182 | -1.365126894 | 0.000132629 | 3.877362373 |
| RP11-474D1.3 | 4.705001442 | -1.365830504 | 0.000194057 | 3.712070102 |
| NEDD4 | 7.809068815 | -1.365955783 | 6.53E-07 | 6.185274142 |
| METTL1 | 2.093287343 | -1.36613449 | 0.024078056 | 1.618378572 |
| TDO2 | 4.434182209 | -1.366257505 | 0.000320893 | 3.493639355 |
| P2RY6 | 4.579876687 | -1.366370108 | 0.00024557 | 3.609824498 |
| PCDHB8 | 4.130932579 | -1.367145136 | 0.000562163 | 3.250137587 |
| STX11 | 4.77369318 | -1.367579075 | 0.000170532 | 3.768193804 |
| RP11-57K17.1 | 4.813991127 | -1.367949487 | 0.000158181 | 3.800847024 |
| PTGIR | 5.083829512 | -1.368449773 | 9.61E-05 | 4.017156487 |
| LOXL1 | 3.494122608 | -1.368831143 | 0.001801071 | 2.744469186 |
| CD84 | 7.231688185 | -1.369061993 | 1.93E-06 | 5.71396701 |
| SOAT1 | 12.32260322 | -1.370318405 | 2.44E-10 | 9.61202407 |
| ADAMTS1 | 6.240903095 | -1.37137188 | 1.17E-05 | 4.933329017 |
| MMP2 | 7.121287889 | -1.371409521 | 2.37E-06 | 5.624662878 |
| CLCA2 | 5.376992108 | -1.371810283 | 5.68E-05 | 4.245547116 |
| CALD1 | 8.977459951 | -1.371957372 | 7.55E-08 | 7.121843926 |
| CTBS | 11.3037985 | -1.372179426 | 1.29E-09 | 8.88839577 |
| BTF3L4P2 | 3.472013374 | -1.372383804 | 0.001876814 | 2.72657886 |
| HPGD | 7.497778806 | -1.37339281 | 1.18E-06 | 5.928272139 |
| OASL | 4.935590418 | -1.373597135 | 0.000127493 | 3.894515047 |
| HRASLS2 | 3.399436204 | -1.373688615 | 0.002147098 | 2.668148164 |
| PTGS1 | 8.357091712 | -1.374860998 | 2.38E-07 | 6.624271895 |
| TULP2 | 4.930792518 | -1.375112186 | 0.000128369 | 3.891540505 |
| TRIM61 | 5.117651016 | -1.375456026 | 9.06E-05 | 4.043024743 |
| EGR1 | 1.718554304 | -1.375491126 | 0.046929271 | 1.32855619 |
| LRRC37A6P | 3.720515503 | -1.375614155 | 0.001177764 | 2.928941758 |
| FAT4 | 8.417391113 | -1.375707733 | 2.10E-07 | 6.678442034 |
| SEMA5A | 6.828471663 | -1.375792006 | 4.00E-06 | 5.397662444 |
| CSTA | 3.725644192 | -1.376064106 | 0.001166424 | 2.933143634 |
| SGMS2 | 5.483240767 | -1.376290428 | 4.66E-05 | 4.331662178 |
| DR1 | 8.725360742 | -1.376396217 | 1.19E-07 | 6.924392704 |
| FOSL2 | 8.408143766 | -1.376486612 | 2.13E-07 | 6.670831785 |
| TUBB1 | 4.228385381 | -1.377757684 | 0.000468068 | 3.329690996 |
| RP11-296E7.1 | 3.770542198 | -1.37841998 | 0.001078791 | 2.967062527 |
| COL22A1 | 3.668931554 | -1.378425388 | 0.001297553 | 2.886875037 |
| C11orf82 | 7.507925691 | -1.378901162 | 1.16E-06 | 5.934532622 |
| AKR1B15 | 2.479186953 | -1.379152964 | 0.011892462 | 1.924728226 |
| CNPY1 | 1.938144912 | -1.379906213 | 0.031830051 | 1.497162666 |
| ANO1 | 6.965775752 | -1.380177084 | 3.18E-06 | 5.497565258 |
| CYR61 | 1.977935759 | -1.380746073 | 0.029724127 | 1.526890896 |
| GBP2 | 2.006616869 | -1.380874401 | 0.028191158 | 1.549887084 |
| TRIP13 | 8.514798963 | -1.38099778 | 1.76E-07 | 6.754221812 |
| GPR156 | 5.129921875 | -1.381873292 | 8.85E-05 | 4.053008215 |
| PLSCR1 | 6.434742331 | -1.381980045 | 8.17E-06 | 5.087547594 |
| KIF15 | 6.478826104 | -1.38209363 | 7.53E-06 | 5.123016673 |
| OLR1 | 6.19463827 | -1.382351362 | 1.27E-05 | 4.895476815 |
| IQGAP1 | 13.62832209 | -1.382641198 | 2.63E-11 | 10.58081036 |
| HHLA2 | 5.087705216 | -1.383320772 | 9.54E-05 | 4.020327783 |
| TTN | 2.820810837 | -1.384109559 | 0.006283865 | 2.201773178 |
| CASP4 | 7.227274922 | -1.384619902 | 1.94E-06 | 5.711818986 |
| AC002480.4 | 1.883699137 | -1.384704795 | 0.034988005 | 1.456080825 |
| KYNU | 5.782354702 | -1.38520033 | 2.71E-05 | 4.567653914 |
| GREM1 | 3.298004757 | -1.385999469 | 0.002600727 | 2.584905287 |
| ATP8B1 | 7.558422003 | -1.386121298 | 1.05E-06 | 5.978620762 |
| C10orf12 | 6.866839877 | -1.386945118 | 3.75E-06 | 5.426109612 |
| ZNF788 | 3.564827965 | -1.387838691 | 0.001573298 | 2.803189081 |
| LINC00449 | 3.431801875 | -1.389403809 | 0.002019203 | 2.694820104 |
| NDE1 | 8.213414838 | -1.390605077 | 3.08E-07 | 6.511019226 |
| HIST1H3E | 2.779404612 | -1.391161123 | 0.006787553 | 2.168286771 |
| LEKR1 | 2.935604745 | -1.391217891 | 0.005102509 | 2.29221626 |
| CYP3A7 | 2.59062096 | -1.392374151 | 0.009679746 | 2.014136018 |
| KIF11 | 5.349567178 | -1.392730939 | 5.97E-05 | 4.223715853 |
| MATN1 | 5.659668767 | -1.392992517 | 3.39E-05 | 4.47018355 |
| ELF4 | 7.098471186 | -1.393132398 | 2.47E-06 | 5.607431452 |
| GRHL3 | 7.119344342 | -1.393214872 | 2.38E-06 | 5.623948221 |
| RP11-3B7.1 | 4.091297687 | -1.394964552 | 0.00060233 | 3.220165172 |
| AFP | 1.698992776 | -1.395019458 | 0.048626306 | 1.31312872 |
| EXOC3L4 | 2.865508878 | -1.395200196 | 0.005796872 | 2.236806281 |
| SYNPO2L | 8.168333238 | -1.395745498 | 3.34E-07 | 6.476146829 |
| ARHGAP18 | 7.863732869 | -1.397291848 | 5.94E-07 | 6.226182842 |
| ESR1 | 3.750991654 | -1.397395334 | 0.001113549 | 2.953290752 |
| MPO | 3.901116635 | -1.39747951 | 0.000849895 | 3.070634529 |
| GNS | 15.13928735 | -1.398220391 | 2.13E-12 | 11.67221128 |
| NKX2-1 | 2.500231836 | -1.399784296 | 0.011420458 | 1.942316493 |
| SLC37A2 | 6.037482455 | -1.400193744 | 1.70E-05 | 4.769783828 |
| MIR155HG | 2.780997572 | -1.403068257 | 0.006766656 | 2.169625906 |
| TLR2 | 5.293275706 | -1.403421978 | 6.62E-05 | 4.179361732 |
| GAPT | 4.909945974 | -1.404054191 | 0.000133182 | 3.875553776 |
| CYP2W1 | 3.671056895 | -1.404155501 | 0.001292456 | 2.888584267 |
| GJC1 | 6.26111838 | -1.406141011 | 1.12E-05 | 4.950196716 |
| RP11-261C10.3 | 4.249114875 | -1.406248797 | 0.000451351 | 3.345485964 |
| WWTR1 | 2.8580973 | -1.406264484 | 0.005880162 | 2.230610742 |
| NUF2 | 5.962093428 | -1.406394672 | 1.94E-05 | 4.711760005 |
| EIF3FP3 | 3.259347079 | -1.406614926 | 0.00279481 | 2.553647726 |
| CCL22 | 5.427504435 | -1.4068238 | 5.15E-05 | 4.288436783 |
| GDF5 | 4.912344902 | -1.406877075 | 0.000132629 | 3.877362373 |
| ST6GALNAC2 | 3.853669174 | -1.407913106 | 0.000924852 | 3.033927925 |
| CST7 | 3.82521803 | -1.408357245 | 0.000975684 | 3.010690895 |
| PRICKLE3 | 9.193397392 | -1.40889261 | 5.11E-08 | 7.291408022 |
| ZNF518B | 11.5232364 | -1.410539446 | 8.90E-10 | 9.050488018 |
| HPN-AS1 | 4.858094991 | -1.410712468 | 0.000146173 | 3.835132244 |
| TRPC4 | 6.351063756 | -1.411006568 | 9.56E-06 | 5.019528162 |
| PARP15 | 3.764995178 | -1.411066528 | 0.00108938 | 2.962820661 |
| PTPRC | 6.328462731 | -1.411135731 | 9.99E-06 | 5.00062131 |
| FST | 4.95436166 | -1.411725265 | 0.000122779 | 3.910876615 |
| IGSF10 | 5.804941357 | -1.411727618 | 2.60E-05 | 4.584335133 |
| TLR5 | 8.991552461 | -1.41289423 | 7.42E-08 | 7.129469634 |
| HOTAIRM1 | 1.829603427 | -1.41448144 | 0.038578041 | 1.413659826 |
| LY75 | 9.908414873 | -1.415020198 | 1.40E-08 | 7.854240658 |
| TTLL13 | 6.096736958 | -1.415245966 | 1.52E-05 | 4.8179048 |
| TLR1 | 7.630709448 | -1.416438703 | 9.14E-07 | 6.03884971 |
| TBX5 | 1.953968468 | -1.416571716 | 0.030943056 | 1.509436803 |
| AL590708.2 | 4.487004363 | -1.417479591 | 0.000291772 | 3.534957078 |
| ANGPT1 | 4.92319169 | -1.417629073 | 0.000130187 | 3.885432058 |
| RP11-74E24.2 | 6.757783158 | -1.419547551 | 4.57E-06 | 5.340522629 |
| LCK | 3.523005699 | -1.419733343 | 0.001702819 | 2.768831578 |
| RASAL2-AS1 | 10.9213219 | -1.420299885 | 2.53E-09 | 8.59768532 |
| CENPI | 6.317949946 | -1.420646977 | 1.02E-05 | 4.990621741 |
| C11orf72 | 5.058699815 | -1.420925065 | 0.00010109 | 3.995291019 |
| ENTPD7 | 8.52386586 | -1.421107528 | 1.74E-07 | 6.760305863 |
| RP11-592N21.1 | 2.542548378 | -1.423011987 | 0.010561106 | 1.976290581 |
| ITGBL1 | 2.769590489 | -1.423032694 | 0.006907034 | 2.160708429 |
| SLC5A1 | 3.915375579 | -1.423498507 | 0.000829222 | 3.081329275 |
| SWAP70 | 11.06799791 | -1.423767729 | 1.93E-09 | 8.71374247 |
| RP11-401P9.6 | 4.046521104 | -1.423841781 | 0.000651693 | 3.185956684 |
| FAM177B | 2.193080407 | -1.425192601 | 0.020082851 | 1.697174629 |
| NODAL | 4.91338409 | -1.425324854 | 0.000132629 | 3.877362373 |
| LINC00862 | 4.345864389 | -1.425568322 | 0.000377164 | 3.423469891 |
| CELSR1 | 1.864901257 | -1.426595003 | 0.036214178 | 1.441121368 |
| CCL4L1 | 2.518459018 | -1.426878731 | 0.011026588 | 1.957558859 |
| ADAM9 | 10.07465736 | -1.428099728 | 1.07E-08 | 7.969303475 |
| PROZ | 2.858506877 | -1.428353449 | 0.005875931 | 2.230923349 |
| COLEC12 | 7.964535958 | -1.429451517 | 4.95E-07 | 6.305179082 |
| ROBO2 | 6.821233739 | -1.430352126 | 4.05E-06 | 5.392485609 |
| MLNR | 3.547251453 | -1.430978809 | 0.001625917 | 2.788901632 |
| NANOG | 1.852471089 | -1.431141003 | 0.037007082 | 1.431715159 |
| ITGA2 | 5.511792179 | -1.431578414 | 4.40E-05 | 4.356403563 |
| TYMS | 5.778937781 | -1.431613277 | 2.72E-05 | 4.5657792 |
| EVI2B | 8.997551938 | -1.431646472 | 7.38E-08 | 7.132081273 |
| C8orf4 | 2.092244195 | -1.431672497 | 0.024119288 | 1.617635512 |
| LAMA2 | 9.261696543 | -1.433108603 | 4.56E-08 | 7.341376819 |
| TSKS | 3.924334221 | -1.433595326 | 0.000815539 | 3.088555145 |
| LRRC3 | 3.973996166 | -1.433734064 | 0.000746255 | 3.127112826 |
| SH2D1A | 2.760452895 | -1.434194327 | 0.007008912 | 2.154349392 |
| PIK3CG | 4.865294808 | -1.436583005 | 0.000143975 | 3.841712829 |
| SRP72P2 | 2.956730865 | -1.436763687 | 0.00490799 | 2.309096297 |
| SHROOM3 | 6.468974434 | -1.437637028 | 7.66E-06 | 5.115777956 |
| SLC26A2 | 12.03723006 | -1.437885687 | 4.01E-10 | 9.396399026 |
| SCML4 | 6.584982344 | -1.438485643 | 6.26E-06 | 5.203532954 |
| ZFP36 | 3.243105016 | -1.43853755 | 0.002880512 | 2.540530288 |
| ADAM20 | 3.910422759 | -1.438815885 | 0.000836724 | 3.077418016 |
| MYOF | 6.23450228 | -1.439792778 | 1.18E-05 | 4.928426336 |
| LRRC55 | 5.729347089 | -1.440614783 | 2.97E-05 | 4.527463316 |
| PKP1 | 3.560968035 | -1.44214308 | 0.001585898 | 2.799724649 |
| LINC00689 | 2.646111032 | -1.443237998 | 0.008693056 | 2.060827525 |
| TSGA10IP | 3.731432328 | -1.445043483 | 0.001153794 | 2.937871901 |
| SKA3 | 5.504347581 | -1.445404877 | 4.47E-05 | 4.350063016 |
| F11 | 3.265341944 | -1.445615168 | 0.002765369 | 2.558246961 |
| MEP1A | 6.838997801 | -1.445707608 | 3.93E-06 | 5.405159336 |
| AC010900.2 | 3.309007714 | -1.446068427 | 0.002545919 | 2.594155491 |
| CDC6 | 7.853161813 | -1.446489223 | 6.03E-07 | 6.219739852 |
| CDK6 | 8.418045031 | -1.446826097 | 2.10E-07 | 6.678442034 |
| CD58 | 8.408576369 | -1.446972139 | 2.13E-07 | 6.670831785 |
| ACTC1 | 3.783861819 | -1.447811037 | 0.001053899 | 2.97720098 |
| SGOL2 | 8.873549504 | -1.449541136 | 9.02E-08 | 7.044573608 |
| FAM221B | 6.052766329 | -1.449763887 | 1.65E-05 | 4.781316529 |
| HSP90AB3P | 2.248900494 | -1.449847591 | 0.018113786 | 1.741990761 |
| BEND3P2 | 2.80178906 | -1.450100718 | 0.006512395 | 2.186259254 |
| IL7 | 4.392946533 | -1.451496782 | 0.000346788 | 3.459935817 |
| KCNE3 | 8.429662376 | -1.451619331 | 2.07E-07 | 6.683640738 |
| CCNB1 | 11.5580807 | -1.452173843 | 8.35E-10 | 9.078290079 |
| B3GNT7 | 4.054436628 | -1.453523931 | 0.000641799 | 3.192601221 |
| S100A9 | 3.070105806 | -1.454196069 | 0.003961 | 2.402195116 |
| RP11-382D8.5 | 4.090812502 | -1.454453166 | 0.000602838 | 3.219799349 |
| KRT8P41 | 3.599502225 | -1.455027831 | 0.001476825 | 2.830671043 |
| PROS1 | 10.40949704 | -1.455071684 | 6.10E-09 | 8.214503062 |
| CRTAM | 2.164749489 | -1.45586361 | 0.021156349 | 1.674559275 |
| C1orf143 | 2.313145177 | -1.455953674 | 0.016150328 | 1.791818658 |
| YY2 | 8.05374075 | -1.45643947 | 4.15E-07 | 6.382031712 |
| COL8A2 | 7.445675244 | -1.458197032 | 1.30E-06 | 5.887705575 |
| STAT1 | 10.5468837 | -1.460551256 | 4.86E-09 | 8.313433937 |
| UBASH3A | 2.033914161 | -1.460825504 | 0.0268337 | 1.571319442 |
| FZD10 | 7.505114638 | -1.460984453 | 1.17E-06 | 5.932602743 |
| NCAPH | 5.924975321 | -1.461470272 | 2.09E-05 | 4.679708031 |
| CDK1 | 6.044145634 | -1.463004092 | 1.68E-05 | 4.77476729 |
| B3GNT8 | 8.889583759 | -1.46345725 | 8.78E-08 | 7.056443791 |
| HOXC4 | 4.335446246 | -1.464667332 | 0.000384838 | 3.41472217 |
| AC007879.7 | 3.919399113 | -1.464866023 | 0.000822779 | 3.084716609 |
| CALHM3 | 3.535326035 | -1.465135358 | 0.001662407 | 2.779262584 |
| RP4-592A1.2 | 3.45146082 | -1.465540564 | 0.001946099 | 2.710834982 |
| RP5-1071N3.1 | 4.556668354 | -1.465603032 | 0.0002563 | 3.591251723 |
| FUT5 | 7.613699247 | -1.465977241 | 9.44E-07 | 6.025131884 |
| AP000289.6 | 4.577614275 | -1.466359303 | 0.00024602 | 3.609029551 |
| C3orf52 | 4.18099881 | -1.467253823 | 0.000510846 | 3.291709968 |
| SLA | 11.04248894 | -1.468155913 | 1.98E-09 | 8.703341264 |
| FAM186B | 5.395900568 | -1.468194703 | 5.48E-05 | 4.261154362 |
| IKZF2 | 8.37782957 | -1.470603377 | 2.28E-07 | 6.642040702 |
| GDF6 | 5.651756016 | -1.470791481 | 3.42E-05 | 4.465494135 |
| UTS2 | 3.469221409 | -1.470810651 | 0.00188505 | 2.724677033 |
| ASF1B | 5.32840137 | -1.471142688 | 6.18E-05 | 4.208920436 |
| ALOX5AP | 5.204393489 | -1.47193703 | 7.83E-05 | 4.105961914 |
| TLR3 | 6.600484442 | -1.472113461 | 6.09E-06 | 5.215517339 |
| TIMP1 | 1.746617843 | -1.47308199 | 0.044715087 | 1.349545918 |
| STIL | 14.083003 | -1.473090764 | 1.09E-11 | 10.96201329 |
| GABRR2 | 4.240104508 | -1.474004298 | 0.000459033 | 3.338155896 |
| WNT5A | 6.518394243 | -1.47457305 | 7.01E-06 | 5.154329827 |
| PCOLCE2 | 6.969154313 | -1.474954357 | 3.16E-06 | 5.500256494 |
| SH2D7 | 6.285678825 | -1.475388962 | 1.07E-05 | 4.968995012 |
| DCSTAMP | 4.13223255 | -1.475438363 | 0.000561093 | 3.250965371 |
| KIF25-AS1 | 2.257617147 | -1.475854131 | 0.017813139 | 1.749259544 |
| CRYAA | 2.671944304 | -1.475956852 | 0.008274126 | 2.08227789 |
| CLIC4 | 9.830767962 | -1.476010274 | 1.61E-08 | 7.794205632 |
| C16orf47 | 2.561675616 | -1.476074458 | 0.010195048 | 1.991610744 |
| MMRN1 | 5.659522051 | -1.476261196 | 3.39E-05 | 4.47018355 |
| GDF15 | 4.152343707 | -1.476510023 | 0.000539345 | 3.268133166 |
| ASPN | 4.725585266 | -1.477777996 | 0.000186937 | 3.728304816 |
| OAS2 | 5.914144053 | -1.479376815 | 2.12E-05 | 4.672894218 |
| WDR63 | 2.731332438 | -1.479964164 | 0.007406812 | 2.130368668 |
| CRISPLD1 | 4.741791352 | -1.480303724 | 0.000181305 | 3.741589057 |
| FAM114A1 | 9.225508906 | -1.483186152 | 4.91E-08 | 7.308640169 |
| EREG | 1.715116582 | -1.483714463 | 0.047198515 | 1.326071668 |
| TRPC6 | 4.458913515 | -1.484587105 | 0.000306835 | 3.513095753 |
| PAX1 | 3.253203901 | -1.485415392 | 0.002826669 | 2.548725071 |
| JAG1 | 6.463185556 | -1.485624719 | 7.71E-06 | 5.112754266 |
| KCNJ1 | 3.77376482 | -1.486225738 | 0.001071899 | 2.969846214 |
| LRRK2 | 7.555583747 | -1.487999522 | 1.05E-06 | 5.977222228 |
| EVC2 | 2.975711734 | -1.488200447 | 0.004751455 | 2.323173367 |
| TNFAIP8 | 7.41956947 | -1.48872506 | 1.36E-06 | 5.86804558 |
| CCDC122 | 8.419098859 | -1.489921007 | 2.10E-07 | 6.678442034 |
| RPL7AP66 | 2.273077786 | -1.490217259 | 0.017344207 | 1.760845543 |
| AC004166.6 | 5.285470423 | -1.490871267 | 6.73E-05 | 4.172046911 |
| CPM | 7.9211344 | -1.491679239 | 5.31E-07 | 6.274705345 |
| NHSL2 | 8.931618556 | -1.493028059 | 8.11E-08 | 7.090993999 |
| C9orf47 | 5.222083409 | -1.494329677 | 7.59E-05 | 4.11965874 |
| KLHL4 | 6.68693364 | -1.496812505 | 5.15E-06 | 5.287803854 |
| PHEX | 5.352684962 | -1.497111528 | 5.94E-05 | 4.226334673 |
| FAM26E | 6.222100949 | -1.498032887 | 1.21E-05 | 4.918250042 |
| ZNF468 | 9.885077943 | -1.498051483 | 1.44E-08 | 7.840482056 |
| VNN3 | 3.671871693 | -1.498234409 | 0.001290444 | 2.889260952 |
| RP11-395L14.17 | 2.532421785 | -1.4986463 | 0.010760171 | 1.968180844 |
| NAT2 | 3.438061347 | -1.499395618 | 0.001995511 | 2.699945767 |
| HLA-G | 3.418918332 | -1.503225313 | 0.002069932 | 2.684043819 |
| SERPINH1 | 5.728789504 | -1.503581805 | 2.98E-05 | 4.526228136 |
| FAM46A | 8.58716492 | -1.503863352 | 1.56E-07 | 6.807816617 |
| KLHL30 | 7.226620429 | -1.50407718 | 1.94E-06 | 5.711818986 |
| ANO6 | 9.899513922 | -1.507048394 | 1.42E-08 | 7.848945458 |
| CYP27B1 | 2.38875446 | -1.508526524 | 0.014084566 | 1.851256537 |
| NBPF16 | 5.928731429 | -1.512937132 | 2.08E-05 | 4.682568736 |
| PAX7 | 3.335774653 | -1.51295045 | 0.002418177 | 2.616511967 |
| MAP3K15 | 5.16328825 | -1.513220769 | 8.42E-05 | 4.07480426 |
| TRIM29 | 5.254517769 | -1.513603163 | 7.12E-05 | 4.147592913 |
| AC022498.1 | 2.059268639 | -1.513623502 | 0.025627381 | 1.59129578 |
| FABP1 | 2.956332737 | -1.514921175 | 0.004910194 | 2.308901389 |
| FNDC7 | 5.134021687 | -1.516449768 | 8.80E-05 | 4.055762505 |
| MBNL3 | 8.162739862 | -1.517154241 | 3.37E-07 | 6.472183526 |
| TCP11 | 6.709485693 | -1.517690714 | 4.97E-06 | 5.30355096 |
| KMO | 8.355388667 | -1.519845898 | 2.38E-07 | 6.623533372 |
| ZG16B | 2.926911205 | -1.52016755 | 0.00518885 | 2.284928857 |
| NKX3-2 | 3.025123567 | -1.520340232 | 0.004310846 | 2.365437492 |
| RP11-290F20.3 | 5.709889968 | -1.520949436 | 3.08E-05 | 4.512021174 |
| IL6 | 2.071596193 | -1.521718887 | 0.025063041 | 1.600966229 |
| NPC1L1 | 2.520647364 | -1.521828601 | 0.010990114 | 1.958997808 |
| PYGL | 5.99695243 | -1.522661624 | 1.82E-05 | 4.739123664 |
| ITGB1 | 10.40621051 | -1.523302641 | 6.10E-09 | 8.214503062 |
| DAPP1 | 9.081535514 | -1.52389099 | 6.25E-08 | 7.204275309 |
| GDF7 | 3.882431604 | -1.524243932 | 0.000877251 | 3.05687607 |
| CD109 | 8.660911351 | -1.52662354 | 1.35E-07 | 6.87011118 |
| NPR3 | 2.346639286 | -1.528635512 | 0.015201489 | 1.818113883 |
| HTR1D | 5.646067075 | -1.530059012 | 3.46E-05 | 4.460742544 |
| OLFML2A | 4.977970947 | -1.530094981 | 0.000117511 | 3.929921842 |
| FKBP9 | 9.931482455 | -1.531282756 | 1.36E-08 | 7.865431041 |
| CD69 | 2.927571612 | -1.533065459 | 0.005182162 | 2.285488982 |
| EGFLAM | 9.274627923 | -1.534636926 | 4.46E-08 | 7.350443216 |
| PLA2R1 | 3.402110341 | -1.536317388 | 0.002137555 | 2.670082703 |
| KLHL6 | 12.36752001 | -1.53656518 | 2.26E-10 | 9.645274507 |
| MCAM | 7.990664584 | -1.536569806 | 4.68E-07 | 6.329829468 |
| SLFN12 | 10.086423 | -1.536868972 | 1.06E-08 | 7.976291179 |
| HOXD3 | 2.213300588 | -1.537769693 | 0.01935984 | 1.713098239 |
| SLC30A2 | 4.566208708 | -1.539646444 | 0.000251991 | 3.598614255 |
| SLAMF7 | 3.261973926 | -1.540172412 | 0.00278093 | 2.555809937 |
| GATSL1 | 4.230850092 | -1.540460375 | 0.000466275 | 3.33135749 |
| TMC2 | 3.479453777 | -1.540901335 | 0.001850355 | 2.732744835 |
| LEFTY2 | 1.858247927 | -1.541383573 | 0.036640083 | 1.436043547 |
| DNAJC22 | 8.088291377 | -1.541492342 | 3.86E-07 | 6.412883512 |
| MET | 3.751452337 | -1.541658411 | 0.001113105 | 2.953464046 |
| RP11-157J24.1 | 2.748565509 | -1.543605544 | 0.007169874 | 2.144488487 |
| CDH11 | 9.257362373 | -1.543795959 | 4.59E-08 | 7.338539649 |
| FLG | 3.199687183 | -1.543990138 | 0.003116366 | 2.50635153 |
| P2RY8 | 3.907333749 | -1.545682261 | 0.000841111 | 3.075146598 |
| SEC24D | 12.78529788 | -1.547763461 | 1.15E-10 | 9.937949215 |
| G0S2 | 2.667081401 | -1.548225478 | 0.008354376 | 2.07808597 |
| C12orf71 | 3.358114306 | -1.549565343 | 0.002314812 | 2.635484331 |
| HIST1H2AG | 6.388282848 | -1.549646003 | 8.92E-06 | 5.049724145 |
| RGL4 | 5.448122371 | -1.550192162 | 4.95E-05 | 4.30543 |
| OSR2 | 1.799865553 | -1.551306834 | 0.04066119 | 1.390819918 |
| EVC | 9.168320158 | -1.551665808 | 5.29E-08 | 7.27694935 |
| FOXM1 | 5.757139925 | -1.552034153 | 2.84E-05 | 4.546577111 |
| AP000679.2 | 3.004709054 | -1.552686098 | 0.00449132 | 2.347626031 |
| EPSTI1 | 8.285301404 | -1.553108742 | 2.73E-07 | 6.563402039 |
| SIRPB2 | 9.266809448 | -1.553390946 | 4.53E-08 | 7.34425789 |
| MEFV | 10.18231408 | -1.553794286 | 9.11E-09 | 8.040584496 |
| FFAR2 | 3.393637812 | -1.553923479 | 0.002167352 | 2.664070545 |
| PKDREJ | 7.18040401 | -1.558350559 | 2.13E-06 | 5.672000658 |
| HOXA13 | 1.745664304 | -1.558750086 | 0.044785348 | 1.34886405 |
| CCIN | 5.620791209 | -1.558943049 | 3.62E-05 | 4.441328934 |
| RP11-767N6.2 | 5.420371972 | -1.559725209 | 5.22E-05 | 4.282153745 |
| ZP1 | 4.061241044 | -1.560939964 | 0.000635018 | 3.197214261 |
| FABP5 | 3.970563975 | -1.561124087 | 0.000751068 | 3.124320551 |
| CNN3 | 10.69886163 | -1.563002508 | 3.76E-09 | 8.424720677 |
| OXGR1 | 4.869501677 | -1.563619125 | 0.000143076 | 3.844433535 |
| PAX8 | 6.912577625 | -1.563886986 | 3.44E-06 | 5.463084532 |
| NFKBIZ | 8.273874519 | -1.563958981 | 2.78E-07 | 6.55661905 |
| SERPINB8 | 13.68007532 | -1.564325897 | 2.48E-11 | 10.60540299 |
| NFIL3 | 11.83450422 | -1.564385826 | 5.33E-10 | 9.273079786 |
| SLC43A3 | 6.676917205 | -1.564473309 | 5.24E-06 | 5.28059466 |
| MYOM3 | 1.835167061 | -1.565306241 | 0.03818818 | 1.418071035 |
| RBM47 | 10.50023295 | -1.56543886 | 5.26E-09 | 8.278647067 |
| TIFA | 8.962246835 | -1.565550703 | 7.72E-08 | 7.112137594 |
| ZBTB42 | 10.5567103 | -1.565590915 | 4.80E-09 | 8.318777188 |
| TMEM217 | 7.115419251 | -1.565842485 | 2.39E-06 | 5.621251227 |
| MAB21L1 | 1.996176163 | -1.566805037 | 0.028747123 | 1.541405609 |
| RP11-553A21.3 | 7.648541222 | -1.566885001 | 8.90E-07 | 6.050488018 |
| KLHL33 | 3.543698542 | -1.567510954 | 0.001636305 | 2.786135819 |
| C3orf72 | 4.110930192 | -1.567814029 | 0.000582692 | 3.234560942 |
| WFIKKN2 | 4.761904432 | -1.568527296 | 0.000174581 | 3.758002814 |
| AC104135.3 | 5.824102228 | -1.569014085 | 2.51E-05 | 4.600716371 |
| ESR2 | 9.600370968 | -1.569618014 | 2.46E-08 | 7.609557307 |
| IL10 | 5.407937662 | -1.570082656 | 5.34E-05 | 4.272267341 |
| BRIP1 | 8.170401965 | -1.571395202 | 3.34E-07 | 6.47645675 |
| METTL21B | 5.197146103 | -1.571777175 | 7.90E-05 | 4.102210107 |
| MYH6 | 4.424275408 | -1.572360093 | 0.000326222 | 3.486487215 |
| PBX3 | 14.34978505 | -1.572859802 | 8.49E-12 | 11.07112178 |
| SKA1 | 6.055530281 | -1.573201078 | 1.65E-05 | 4.782984581 |
| FAIM3 | 8.582901331 | -1.573486093 | 1.56E-07 | 6.807215911 |
| RP11-290F20.2 | 3.904624461 | -1.575666753 | 0.000845029 | 3.073128545 |
| TMEM72 | 4.798488606 | -1.576723286 | 0.000163317 | 3.786969085 |
| SAMD9L | 7.93051099 | -1.577211599 | 5.24E-07 | 6.280609293 |
| AMBP | 1.936319183 | -1.578306635 | 0.031931655 | 1.495778576 |
| MMP19 | 3.478232689 | -1.57854747 | 0.001855017 | 2.731652018 |
| DUOX2 | 2.42246717 | -1.578654938 | 0.013229508 | 1.878456305 |
| APOBEC2 | 2.893980237 | -1.578726171 | 0.005509825 | 2.258862176 |
| CYTIP | 11.21177702 | -1.579399367 | 1.50E-09 | 8.822535426 |
| EYS | 4.721010992 | -1.579777621 | 0.000188531 | 3.724617631 |
| IL25 | 3.495644121 | -1.580248725 | 0.001796367 | 2.745605052 |
| INHBC | 5.871285908 | -1.580394546 | 2.29E-05 | 4.639647479 |
| SIX1 | 5.516102045 | -1.58048639 | 4.37E-05 | 4.359672983 |
| FAM184B | 4.927423235 | -1.580822566 | 0.000129167 | 3.88884677 |
| C2orf48 | 4.243851055 | -1.582052296 | 0.000456 | 3.341035157 |
| IL7R | 3.648862758 | -1.5823924 | 0.001346045 | 2.870940338 |
| ARHGAP11B | 6.000560847 | -1.582508605 | 1.81E-05 | 4.742639298 |
| IFNLR1 | 11.38051648 | -1.582708527 | 1.10E-09 | 8.959668464 |
| NAT8 | 4.732969778 | -1.582949429 | 0.000184631 | 3.733696358 |
| TC2N | 6.03261375 | -1.583461171 | 1.71E-05 | 4.767513906 |
| TRPV5 | 4.079976785 | -1.584697737 | 0.00061436 | 3.211576936 |
| GPR65 | 3.263906993 | -1.585150043 | 0.002771544 | 2.557278145 |
| CLEC17A | 3.73499432 | -1.585709323 | 0.001146621 | 2.940580117 |
| COL10A1 | 4.792161681 | -1.586822974 | 0.000165103 | 3.782244405 |
| HS3ST3A1 | 2.453179583 | -1.587307228 | 0.012503665 | 1.902962656 |
| AC007405.2 | 3.829575221 | -1.587704905 | 0.000967853 | 3.014190377 |
| DNM3OS | 3.869785622 | -1.588163392 | 0.000897485 | 3.046972778 |
| NID1 | 6.933737402 | -1.588360619 | 3.33E-06 | 5.477172769 |
| RP11-195F19.9 | 3.629629067 | -1.589703047 | 0.00139554 | 2.855257633 |
| MGP | 2.05274184 | -1.589934839 | 0.025904991 | 1.586616546 |
| ZNF805 | 9.331323454 | -1.591276458 | 4.00E-08 | 7.397435655 |
| DLX6 | 2.297241609 | -1.591494381 | 0.016595974 | 1.779997247 |
| IL1R2 | 3.263615343 | -1.59163771 | 0.002772664 | 2.557102739 |
| BCL2A1 | 3.984319147 | -1.591703594 | 0.000732255 | 3.135337679 |
| C3orf67 | 6.055430187 | -1.591860976 | 1.65E-05 | 4.782984581 |
| SEL1L3 | 7.531838383 | -1.593457262 | 1.11E-06 | 5.954649953 |
| ICAM1 | 6.032248053 | -1.59370437 | 1.71E-05 | 4.767513906 |
| AC108142.1 | 3.752253153 | -1.594566958 | 0.001111689 | 2.954016879 |
| RPE65 | 4.414052862 | -1.59592136 | 0.000332814 | 3.477798626 |
| RPS3AP5 | 3.695063246 | -1.596038909 | 0.001235962 | 2.907994838 |
| ADAMTSL4-AS1 | 4.730180464 | -1.596502962 | 0.000185336 | 3.73203925 |
| ECHDC3 | 10.46684519 | -1.597062115 | 5.54E-09 | 8.256860781 |
| BIRC3 | 7.461364941 | -1.597094968 | 1.26E-06 | 5.898356543 |
| PTGES3P1 | 2.965360943 | -1.598919358 | 0.004837448 | 2.315383671 |
| FAM71D | 3.837419346 | -1.598997867 | 0.000952581 | 3.021098173 |
| LRRC10 | 2.391781609 | -1.599699125 | 0.014016231 | 1.853368762 |
| AKAP12 | 7.721491002 | -1.59975337 | 7.74E-07 | 6.111061614 |
| SRSF9P1 | 3.09520547 | -1.600204279 | 0.003791536 | 2.42118483 |
| RP3-437C15.1 | 3.662187918 | -1.600777413 | 0.001313023 | 2.881727571 |
| CD226 | 11.9235873 | -1.601557333 | 4.71E-10 | 9.327123574 |
| TAGLN2 | 6.941346352 | -1.601566515 | 3.29E-06 | 5.483409862 |
| CSNK1A1L | 4.44381655 | -1.603406711 | 0.000315365 | 3.501186075 |
| TSPEAR | 3.746937433 | -1.605528899 | 0.001122138 | 2.949953598 |
| GLIPR1 | 8.580537417 | -1.605850767 | 1.57E-07 | 6.805264233 |
| C1orf111 | 5.77262393 | -1.606238561 | 2.76E-05 | 4.559122309 |
| SIGLEC15 | 5.241004961 | -1.607030924 | 7.32E-05 | 4.135703674 |
| C9orf173 | 4.903253154 | -1.607030924 | 0.000134504 | 3.871263995 |
| ECM2 | 5.18778514 | -1.609623861 | 8.04E-05 | 4.095009961 |
| OR1L8 | 4.112039124 | -1.610236914 | 0.000581418 | 3.235511187 |
| C8orf34 | 6.101222604 | -1.611647138 | 1.51E-05 | 4.820527198 |
| CD5 | 8.445109927 | -1.612836546 | 2.01E-07 | 6.697813767 |
| GPR25 | 2.864873805 | -1.612918148 | 0.00580338 | 2.236318963 |
| PDCD1LG2 | 7.565322396 | -1.614588915 | 1.04E-06 | 5.984089737 |
| ERVMER34-1 | 4.148095606 | -1.61502626 | 0.000543393 | 3.264886091 |
| CYP26C1 | 4.760186887 | -1.615220322 | 0.000175311 | 3.756191405 |
| PLAG1 | 8.470591903 | -1.61600214 | 1.92E-07 | 6.716259065 |
| NKX6-1 | 2.772110457 | -1.61668361 | 0.006875673 | 2.162684756 |
| SPRY4 | 6.513460705 | -1.616772475 | 7.09E-06 | 5.14916274 |
| PTPN7 | 5.20249414 | -1.616958454 | 7.85E-05 | 4.105147338 |
| RBMXL2 | 3.708423312 | -1.617645185 | 0.001203959 | 2.919388418 |
| FCGR2A | 8.550927984 | -1.617738386 | 1.65E-07 | 6.783267989 |
| PLK4 | 12.75222359 | -1.618732046 | 1.20E-10 | 9.920614063 |
| PCDHA6 | 2.96221334 | -1.6190463 | 0.004863486 | 2.313052363 |
| RASEF | 4.240902822 | -1.6190463 | 0.000458428 | 3.338729256 |
| PLEKHA8P1 | 9.021801079 | -1.619713211 | 7.05E-08 | 7.151814047 |
| RUNX1 | 6.954003478 | -1.620212506 | 3.23E-06 | 5.490353915 |
| FPR1 | 7.044515376 | -1.62162092 | 2.73E-06 | 5.563701192 |
| CYP2S1 | 11.46912339 | -1.623184737 | 9.81E-10 | 9.008218855 |
| RP11-553A10.1 | 6.858184415 | -1.626827941 | 3.81E-06 | 5.419147733 |
| SCAND3 | 6.921993741 | -1.627762189 | 3.42E-06 | 5.466373886 |
| IHH | 3.588471548 | -1.629511782 | 0.001507714 | 2.82168117 |
| STX19 | 4.905815644 | -1.629745136 | 0.000133731 | 3.873766969 |
| RP11-269F19.2 | 7.145505085 | -1.632208941 | 2.28E-06 | 5.641640222 |
| FEV | 1.859167139 | -1.632386498 | 0.036585908 | 1.436686157 |
| ZSCAN5B | 3.597467716 | -1.632420437 | 0.001481992 | 2.829154181 |
| LATS2 | 10.42335885 | -1.634105397 | 6.01E-09 | 8.220826948 |
| CDCP2 | 3.505433469 | -1.634687267 | 0.001759978 | 2.754492778 |
| SLC27A6 | 3.411450263 | -1.63613874 | 0.002097439 | 2.678310561 |
| C14orf166B | 2.169554223 | -1.63639604 | 0.020967952 | 1.678443989 |
| IL17B | 3.908438684 | -1.636621013 | 0.000839578 | 3.075938786 |
| SLC11A1 | 5.142524151 | -1.637370515 | 8.69E-05 | 4.060825525 |
| TEX26 | 3.056128101 | -1.638415163 | 0.004076567 | 2.389705374 |
| PDLIM1 | 5.217416932 | -1.638431607 | 7.65E-05 | 4.116493174 |
| PALM2-AKAP2 | 3.952704801 | -1.638539592 | 0.000775147 | 3.110615651 |
| RP11-353N4.5 | 5.574848023 | -1.639372585 | 3.92E-05 | 4.407137372 |
| CCDC8 | 6.181324248 | -1.640884308 | 1.30E-05 | 4.885267271 |
| CCDC109B | 5.969280148 | -1.642422707 | 1.91E-05 | 4.718987149 |
| SIRPB1 | 4.647322935 | -1.64343688 | 0.000216474 | 3.664593929 |
| RP11-4C20.3 | 5.741922155 | -1.644025131 | 2.91E-05 | 4.5363682 |
| HFE | 12.5641155 | -1.64688484 | 1.66E-10 | 9.779421245 |
| MYO3B | 5.61344263 | -1.647098244 | 3.68E-05 | 4.434410017 |
| NEDD9 | 10.7349657 | -1.647869694 | 3.57E-09 | 8.447837551 |
| GTSE1 | 6.236375167 | -1.648524553 | 1.17E-05 | 4.930204143 |
| FAM64A | 5.919972951 | -1.65321124 | 2.10E-05 | 4.678077878 |
| RP1-35C21.2 | 2.252944086 | -1.653330738 | 0.017979376 | 1.745225396 |
| CD244 | 7.952300629 | -1.653345393 | 5.04E-07 | 6.297523727 |
| ASB5 | 1.974265439 | -1.654046046 | 0.02987606 | 1.524676672 |
| IL1RAP | 6.119009678 | -1.655577445 | 1.46E-05 | 4.835811998 |
| OLFML1 | 11.64429985 | -1.655612132 | 7.31E-10 | 9.136255453 |
| HAS2 | 5.826653877 | -1.65655756 | 2.50E-05 | 4.602856085 |
| EDARADD | 6.995189945 | -1.656660222 | 3.02E-06 | 5.51988165 |
| CHRM5 | 2.7384852 | -1.658228173 | 0.007311936 | 2.135967618 |
| RP11-381O7.3 | 5.079881901 | -1.659207449 | 9.70E-05 | 4.013227056 |
| ITGA1 | 4.247453026 | -1.660166177 | 0.000453373 | 3.343544421 |
| HSD3BP5 | 3.296988171 | -1.660226748 | 0.00260527 | 2.584147295 |
| C2orf70 | 2.520223844 | -1.660423769 | 0.010996619 | 1.958740807 |
| CTGF | 9.569138859 | -1.661439139 | 2.59E-08 | 7.586730724 |
| NOX1 | 2.612240345 | -1.661574463 | 0.009274138 | 2.032726444 |
| SLC25A24 | 15.70429689 | -1.663145379 | 9.40E-13 | 12.0268241 |
| ALDH1A3 | 2.253412798 | -1.664178188 | 0.017963026 | 1.745620508 |
| NRAP | 3.3973178 | -1.664321931 | 0.00215393 | 2.66676832 |
| CLEC10A | 4.322789375 | -1.665337981 | 0.000394252 | 3.4042264 |
| GCGR | 3.563715153 | -1.666793071 | 0.001576856 | 2.802208049 |
| ARHGEF35 | 4.928589561 | -1.6679781 | 0.000129167 | 3.88884677 |
| SVIL | 10.62254091 | -1.669373013 | 4.22E-09 | 8.374236119 |
| AP006216.11 | 9.644354867 | -1.670239591 | 2.25E-08 | 7.64870467 |
| CALU | 5.333058215 | -1.67101778 | 6.13E-05 | 4.212670204 |
| IL18RAP | 4.277751315 | -1.674057885 | 0.000428354 | 3.36819679 |
| EGFR | 3.057545231 | -1.674252143 | 0.00406726 | 2.39069808 |
| MYO5B | 3.962058624 | -1.674933493 | 0.000762819 | 3.117578761 |
| NAP1L4P1 | 4.474532996 | -1.675202427 | 0.00029842 | 3.525171692 |
| FCGR3A | 4.167211027 | -1.675360558 | 0.00052413 | 3.280561089 |
| FAM115D | 5.446035045 | -1.675409845 | 4.97E-05 | 4.303632369 |
| GLIS3 | 9.190030376 | -1.676245238 | 5.11E-08 | 7.291408022 |
| SCIMP | 11.95487528 | -1.678681004 | 4.49E-10 | 9.348204178 |
| MICALCL | 4.947712758 | -1.679634673 | 0.000124411 | 3.905139954 |
| TMSB4XP8 | 6.753210256 | -1.680422494 | 4.60E-06 | 5.336778892 |
| KDELR3 | 7.507584714 | -1.681376635 | 1.16E-06 | 5.934532622 |
| NLRP4 | 5.610710653 | -1.68214524 | 3.69E-05 | 4.433322569 |
| ARSJ | 5.842907508 | -1.682430466 | 2.43E-05 | 4.614605197 |
| GPR151 | 5.684920406 | -1.683250955 | 3.24E-05 | 4.490035231 |
| ULBP1 | 4.436079494 | -1.684081445 | 0.000319443 | 3.495607104 |
| RWDD4P2 | 5.093570883 | -1.685132015 | 9.43E-05 | 4.025412776 |
| NUAK2 | 3.452568251 | -1.686776301 | 0.001942267 | 2.711691176 |
| HSH2D | 4.303044916 | -1.687340449 | 0.000408201 | 3.389125989 |
| KLHDC7B | 4.309292186 | -1.690001838 | 0.000404208 | 3.393395401 |
| CDKN2B | 6.908704249 | -1.69042766 | 3.47E-06 | 5.460184083 |
| BANK1 | 5.721994352 | -1.690614647 | 3.02E-05 | 4.519680024 |
| ADIG | 3.816349578 | -1.690665753 | 0.00099139 | 3.003755381 |
| CLDN1 | 8.834006222 | -1.691857975 | 9.73E-08 | 7.01199386 |
| MYBL2 | 4.036112404 | -1.691965956 | 0.000664106 | 3.177762319 |
| RIPK4 | 2.697410083 | -1.692711076 | 0.007907885 | 2.10193965 |
| KCNV2 | 4.500543456 | -1.695443219 | 0.000283892 | 3.546847199 |
| SH2D1B | 4.976071004 | -1.695448413 | 0.000118212 | 3.927338081 |
| GBP1 | 3.743692225 | -1.697005869 | 0.001128299 | 2.947575954 |
| BIRC5 | 6.959652701 | -1.697212475 | 3.21E-06 | 5.49294997 |
| DDIT4L | 2.382999902 | -1.69894495 | 0.014228527 | 1.846840048 |
| FREM2 | 5.503100828 | -1.699195011 | 4.47E-05 | 4.3493298 |
| AL136115.1 | 5.476459148 | -1.700008111 | 4.71E-05 | 4.326727891 |
| EPPK1 | 8.695221673 | -1.700759059 | 1.27E-07 | 6.897520557 |
| CXCR1 | 5.804409588 | -1.701633912 | 2.60E-05 | 4.584335133 |
| PTGS2 | 3.987943988 | -1.703067815 | 0.000727249 | 3.138317109 |
| C4orf6 | 1.781153869 | -1.703071977 | 0.042038871 | 1.376348959 |
| TPX2 | 8.423933477 | -1.703625848 | 2.09E-07 | 6.680382068 |
| SPCS2P4 | 7.701377668 | -1.704300782 | 8.04E-07 | 6.09467408 |
| TNC | 4.820690432 | -1.70498464 | 0.000156283 | 3.80608842 |
| NUS1P2 | 4.462566847 | -1.706070397 | 0.000305181 | 3.515442248 |
| LINC00606 | 4.68744023 | -1.707005431 | 0.00020007 | 3.698818273 |
| CD177 | 4.041256546 | -1.708190839 | 0.000657165 | 3.182325488 |
| DNASE1L3 | 2.171226498 | -1.708312232 | 0.020894185 | 1.679974574 |
| AC004797.1 | 7.32948448 | -1.709554776 | 1.62E-06 | 5.791546135 |
| GBP3 | 6.63064574 | -1.711496948 | 5.76E-06 | 5.239267819 |
| TFPI2 | 5.581852767 | -1.713744036 | 3.87E-05 | 4.412031135 |
| HGF | 6.929909086 | -1.714838279 | 3.38E-06 | 5.47171537 |
| PRR16 | 9.102134003 | -1.71637581 | 6.00E-08 | 7.221742216 |
| FAM209A | 4.088750652 | -1.716655415 | 0.000605338 | 3.218002418 |
| C9orf64 | 11.18342872 | -1.716716669 | 1.57E-09 | 8.80281509 |
| RP11-61N20.3 | 7.717354761 | -1.717577378 | 7.79E-07 | 6.108373923 |
| CASP5 | 5.116394653 | -1.719741272 | 9.07E-05 | 4.042430375 |
| CTSS | 10.65993028 | -1.722093857 | 3.96E-09 | 8.402174483 |
| CEP170P1 | 6.581702956 | -1.722217851 | 6.29E-06 | 5.201304491 |
| CLMP | 3.973143977 | -1.722526884 | 0.000747171 | 3.126580082 |
| DEPDC1B | 8.62431157 | -1.723082577 | 1.44E-07 | 6.840396679 |
| C10orf105 | 3.636229088 | -1.724567039 | 0.001379248 | 2.860357718 |
| ARID3C | 4.907764734 | -1.725905033 | 0.000133731 | 3.873766969 |
| MREG | 13.07831517 | -1.726261376 | 6.10E-11 | 10.21471617 |
| CD36 | 4.521473395 | -1.726489722 | 0.000272089 | 3.565288855 |
| ZNF285B | 6.387035301 | -1.727847968 | 8.93E-06 | 5.049161927 |
| SIT1 | 2.711221942 | -1.728148754 | 0.00770123 | 2.113439892 |
| KIF2C | 6.71414898 | -1.731001049 | 4.94E-06 | 5.306275895 |
| ADM | 5.46032424 | -1.73158011 | 4.83E-05 | 4.315892108 |
| CDKL4 | 3.337607627 | -1.732542701 | 0.002410652 | 2.617865519 |
| EVX1 | 2.142277542 | -1.733330557 | 0.022028849 | 1.657008189 |
| FAM83F | 3.998916844 | -1.734886859 | 0.000712822 | 3.147018805 |
| LINC01057 | 6.022700045 | -1.734988616 | 1.73E-05 | 4.760778634 |
| NCAPG | 7.09597216 | -1.735083118 | 2.48E-06 | 5.606130046 |
| CHST6 | 7.644685128 | -1.735184809 | 8.94E-07 | 6.048450479 |
| RGS16 | 4.842746479 | -1.7355235 | 0.000150019 | 3.823853475 |
| COL5A1 | 2.503373271 | -1.735554672 | 0.011346783 | 1.945127235 |
| HMOX1 | 2.302191552 | -1.736558219 | 0.016450645 | 1.783817076 |
| IGFBP5 | 5.705607902 | -1.737207346 | 3.10E-05 | 4.507950119 |
| KBTBD13 | 5.006085866 | -1.739209039 | 0.000111798 | 3.951567195 |
| SLC47A2 | 3.286833298 | -1.741306685 | 0.002655359 | 2.575876729 |
| RHOH | 6.242800891 | -1.74191363 | 1.16E-05 | 4.933914913 |
| RBP3 | 2.107298259 | -1.743383087 | 0.023457438 | 1.629719415 |
| RP11-286H14.4 | 2.518507233 | -1.74431704 | 0.011026588 | 1.957558859 |
| WT1 | 2.063111591 | -1.744332968 | 0.025435588 | 1.594558214 |
| ESRP2 | 3.750358181 | -1.744689224 | 0.001114806 | 2.95280073 |
| SLC22A11 | 5.207519309 | -1.744816472 | 7.79E-05 | 4.108302073 |
| CFI | 2.77433696 | -1.745891829 | 0.006848072 | 2.164431678 |
| AC008738.1 | 6.622552657 | -1.746161778 | 5.83E-06 | 5.234154044 |
| E2F2 | 3.868087288 | -1.746280042 | 0.000900687 | 3.045425885 |
| DRAXIN | 5.517359178 | -1.746556445 | 4.36E-05 | 4.3604437 |
| LCTL | 6.189116666 | -1.74812019 | 1.28E-05 | 4.892343625 |
| ADM2 | 5.386412758 | -1.748231636 | 5.59E-05 | 4.252783883 |
| PBK | 5.901034537 | -1.74879496 | 2.19E-05 | 4.660076075 |
| CYP4F2 | 5.629924793 | -1.748877026 | 3.56E-05 | 4.448775879 |
| PRSS21 | 3.045835045 | -1.750228336 | 0.004153036 | 2.381634326 |
| ADAMTS3 | 4.130068927 | -1.750376817 | 0.000562698 | 3.249724782 |
| AC021218.2 | 2.514125454 | -1.75074837 | 0.011115872 | 1.954056449 |
| AC129778.2 | 3.537080997 | -1.753089762 | 0.001657436 | 2.78056326 |
| NUSAP1 | 5.658700999 | -1.753440011 | 3.39E-05 | 4.47018355 |
| STEAP4 | 9.484584043 | -1.754790691 | 3.08E-08 | 7.510906824 |
| SERPINA1 | 5.880954578 | -1.754826757 | 2.26E-05 | 4.645002988 |
| TNFSF8 | 9.982660032 | -1.757562086 | 1.23E-08 | 7.908515942 |
| PTGER4 | 8.259809114 | -1.757852133 | 2.84E-07 | 6.546914428 |
| FPR3 | 5.442668817 | -1.761312031 | 5.00E-05 | 4.300959551 |
| TTK | 8.208592086 | -1.761597552 | 3.10E-07 | 6.508377859 |
| NGFR | 5.603727384 | -1.761668496 | 3.72E-05 | 4.429033672 |
| RP11-213G2.3 | 5.359851865 | -1.76171341 | 5.87E-05 | 4.231397271 |
| CENPA | 8.279707624 | -1.762537414 | 2.75E-07 | 6.559978566 |
| PLEKHN1 | 4.155717212 | -1.76296653 | 0.000535947 | 3.270878129 |
| RPL5P4 | 2.09702269 | -1.763017531 | 0.023905664 | 1.621499182 |
| NDC80 | 7.25888924 | -1.763518174 | 1.85E-06 | 5.732326147 |
| EMR2 | 10.15896866 | -1.763729929 | 9.47E-09 | 8.023710864 |
| TNFRSF12A | 3.431686464 | -1.766371505 | 0.002019203 | 2.694820104 |
| ITGA5 | 10.48276637 | -1.766445891 | 5.43E-09 | 8.264931241 |
| MBOAT4 | 7.730437436 | -1.770237222 | 7.67E-07 | 6.115168683 |
| MEIS3P1 | 10.65905552 | -1.770884131 | 3.96E-09 | 8.402174483 |
| HNRNPA3P6 | 5.686354809 | -1.771353424 | 3.23E-05 | 4.491064698 |
| XIRP2 | 4.263230076 | -1.771367002 | 0.000439891 | 3.356654723 |
| OR7A5 | 4.62966348 | -1.77263361 | 0.000223603 | 3.650521973 |
| HORMAD2 | 4.799551783 | -1.773306217 | 0.000163317 | 3.786969085 |
| CD209 | 7.243041931 | -1.774841641 | 1.90E-06 | 5.722189219 |
| CD48 | 6.202207833 | -1.776125534 | 1.26E-05 | 4.900735867 |
| ARHGAP11A | 8.978631511 | -1.776797853 | 7.55E-08 | 7.121843926 |
| CLEC12A | 4.142965003 | -1.776989722 | 0.000549166 | 3.260296149 |
| RAB42 | 6.302850136 | -1.777502447 | 1.04E-05 | 4.98093604 |
| RORC | 6.624264968 | -1.778511392 | 5.83E-06 | 5.234154044 |
| MLANA | 2.808054656 | -1.779539086 | 0.006428891 | 2.191863926 |
| SLC23A1 | 6.479228873 | -1.78653559 | 7.53E-06 | 5.123016673 |
| CTD-2514C3.1 | 6.661466653 | -1.788620262 | 5.43E-06 | 5.264927776 |
| C2CD4A | 1.913155459 | -1.790338137 | 0.033224754 | 1.478538228 |
| RP11-428P16.2 | 6.119633837 | -1.790338137 | 1.46E-05 | 4.835811998 |
| MMP14 | 8.523200009 | -1.790491556 | 1.74E-07 | 6.760181887 |
| TYRP1 | 4.080104632 | -1.791371639 | 0.00061436 | 3.211576936 |
| HMMR | 8.97675864 | -1.792068474 | 7.55E-08 | 7.121843926 |
| AC020907.1 | 4.92644415 | -1.794100852 | 0.000129167 | 3.88884677 |
| SEMA3A | 7.086516093 | -1.794587322 | 2.52E-06 | 5.599133872 |
| FCN3 | 2.930981254 | -1.795449048 | 0.005149964 | 2.288195774 |
| C1orf141 | 3.519233104 | -1.79549666 | 0.001714755 | 2.765797956 |
| IL2RB | 5.836052411 | -1.796240742 | 2.46E-05 | 4.609000359 |
| CCL21 | 3.236345547 | -1.798641441 | 0.002914097 | 2.535496007 |
| IGFBPL1 | 3.264177989 | -1.799525845 | 0.002771304 | 2.557315754 |
| SATL1 | 9.680612362 | -1.799541279 | 2.10E-08 | 7.677744816 |
| FYB | 10.12716632 | -1.801431285 | 9.91E-09 | 8.004026508 |
| CYP2G1P | 8.451168066 | -1.802800207 | 1.98E-07 | 6.702625735 |
| EGFL6 | 3.423093357 | -1.803228711 | 0.002053655 | 2.687472545 |
| CCDC158 | 6.825465077 | -1.804092321 | 4.00E-06 | 5.397662444 |
| TUBBP1 | 5.912358902 | -1.804201409 | 2.12E-05 | 4.672894218 |
| GBP5 | 3.316851101 | -1.80806158 | 0.002505827 | 2.601048999 |
| CD28 | 4.059759778 | -1.808618447 | 0.000636967 | 3.195883093 |
| CLDN18 | 5.335787144 | -1.81249128 | 6.11E-05 | 4.213941763 |
| LGALS9C | 2.483422219 | -1.813186288 | 0.011801554 | 1.928060799 |
| SMCO3 | 3.662125034 | -1.814485225 | 0.001313023 | 2.881727571 |
| NEK2 | 8.927235516 | -1.814908965 | 8.15E-08 | 7.088879985 |
| CALCR | 9.617158145 | -1.815977814 | 2.37E-08 | 7.624969565 |
| KRT18 | 1.841510173 | -1.815985393 | 0.037759145 | 1.422977852 |
| TES | 12.62626554 | -1.816715214 | 1.49E-10 | 9.82563855 |
| TTC24 | 8.453604433 | -1.818037205 | 1.98E-07 | 6.703803335 |
| SAMD9 | 13.54755123 | -1.818344884 | 2.99E-11 | 10.52491537 |
| KLHL14 | 6.032885944 | -1.818648533 | 1.71E-05 | 4.767513906 |
| GPR126 | 5.142253951 | -1.818887951 | 8.69E-05 | 4.060774592 |
| AP000330.8 | 6.022256149 | -1.821088862 | 1.73E-05 | 4.760739032 |
| AC104600.1 | 4.956723702 | -1.823395584 | 0.000121886 | 3.914047431 |
| F2RL1 | 7.477169997 | -1.823858811 | 1.22E-06 | 5.913314825 |
| AC005014.5 | 5.112045281 | -1.823904157 | 9.14E-05 | 4.039265681 |
| MIPEPP3 | 6.40040798 | -1.825389871 | 8.73E-06 | 5.059064118 |
| LRG1 | 9.213089402 | -1.825839008 | 5.01E-08 | 7.300359992 |
| AIM1 | 5.131990185 | -1.826050902 | 8.82E-05 | 4.054496834 |
| SPACA4 | 3.573442847 | -1.827823485 | 0.001549464 | 2.809818501 |
| GRK7 | 5.218280103 | -1.831780516 | 7.64E-05 | 4.11692176 |
| TRIM58 | 4.059055014 | -1.83244814 | 0.000637443 | 3.195558846 |
| XRCC6P2 | 2.241772365 | -1.832569138 | 0.018363835 | 1.736036621 |
| OR5K2 | 5.434223091 | -1.832620864 | 5.08E-05 | 4.29451542 |
| PKIB | 8.2386052 | -1.833079322 | 2.94E-07 | 6.531962317 |
| NXPE2 | 5.80781606 | -1.834617053 | 2.59E-05 | 4.58635093 |
| WNT2 | 3.491477501 | -1.83530331 | 0.001810471 | 2.742208311 |
| SPATA6 | 18.12046471 | -1.835343835 | 1.44E-14 | 13.84176009 |
| OR2H5P | 5.418619525 | -1.835996274 | 5.23E-05 | 4.281326503 |
| DDR2 | 8.995337497 | -1.837585308 | 7.38E-08 | 7.132081273 |
| SERPINC1 | 5.562693773 | -1.838384048 | 4.01E-05 | 4.396953428 |
| UBTFL6 | 6.646667605 | -1.840042655 | 5.60E-06 | 5.252116223 |
| LDHAP4 | 9.301086037 | -1.840309482 | 4.25E-08 | 7.371839591 |
| GLRA4 | 6.249036446 | -1.840501602 | 1.15E-05 | 4.939099875 |
| DES | 5.456550718 | -1.841262201 | 4.88E-05 | 4.311538362 |
| EDNRA | 11.91303556 | -1.84134593 | 4.73E-10 | 9.325265548 |
| SFTA3 | 6.495164122 | -1.841694804 | 7.30E-06 | 5.136402646 |
| AC096559.1 | 2.450914347 | -1.841717773 | 0.012548297 | 1.901415216 |
| SPRY1 | 7.1392452 | -1.84207225 | 2.31E-06 | 5.637193862 |
| FOXC2 | 7.341851772 | -1.842080225 | 1.58E-06 | 5.80219846 |
| HLA-K | 5.043296487 | -1.842451126 | 0.000104042 | 3.982790762 |
| HELB | 10.37269323 | -1.842570547 | 6.44E-09 | 8.190973455 |
| FAM83G | 9.209427377 | -1.843599958 | 5.01E-08 | 7.300359992 |
| IQGAP3 | 6.533442799 | -1.84587604 | 6.85E-06 | 5.164117707 |
| RAET1E | 3.20451795 | -1.846491543 | 0.003089121 | 2.510165041 |
| MCOLN3 | 5.366829313 | -1.846606357 | 5.79E-05 | 4.237179955 |
| FAM46C | 6.857670363 | -1.848110416 | 3.81E-06 | 5.419147733 |
| KRT80 | 3.953762539 | -1.848541377 | 0.000774114 | 3.111195279 |
| GBP6 | 5.153732116 | -1.849231826 | 8.54E-05 | 4.068495089 |
| CAV2 | 7.342808616 | -1.849825985 | 1.58E-06 | 5.802360772 |
| IL1RL1 | 4.857902493 | -1.850180656 | 0.000146173 | 3.835132244 |
| CCDC73 | 5.003754759 | -1.853521869 | 0.000112231 | 3.949888707 |
| KCNE4 | 5.595296337 | -1.854147663 | 3.77E-05 | 4.423466126 |
| LAMC1 | 10.22122933 | -1.854354836 | 8.52E-09 | 8.069659625 |
| SMC4 | 13.32788554 | -1.854447039 | 3.88E-11 | 10.41144446 |
| DPP4 | 2.12705234 | -1.855941545 | 0.022675424 | 1.644444578 |
| OR10AB1P | 5.224108428 | -1.856358775 | 7.57E-05 | 4.120966781 |
| BRCA2 | 9.925137634 | -1.856823219 | 1.37E-08 | 7.863366281 |
| STAB2 | 6.498129758 | -1.857684052 | 7.28E-06 | 5.138080271 |
| KIF23 | 9.499867216 | -1.858005939 | 2.99E-08 | 7.524938273 |
| XKR5 | 5.474380003 | -1.858922699 | 4.72E-05 | 4.326396441 |
| TEX38 | 3.677253146 | -1.859165261 | 0.001276995 | 2.893810847 |
| HSPB7 | 8.884314961 | -1.859554877 | 8.89E-08 | 7.051316034 |
| FGF7 | 4.780849891 | -1.860042102 | 0.000168953 | 3.77223285 |
| HNRNPA3P12 | 4.575256924 | -1.860400047 | 0.000247641 | 3.606177829 |
| MPL | 4.085334042 | -1.861834515 | 0.000609583 | 3.214967059 |
| OR52N4 | 4.119827413 | -1.86312447 | 0.000573386 | 3.241552796 |
| ADAMTS18 | 5.2404861 | -1.864068761 | 7.32E-05 | 4.135239097 |
| SIGLEC17P | 5.840479952 | -1.865233926 | 2.43E-05 | 4.614605197 |
| C3orf36 | 3.258577773 | -1.865284232 | 0.002798265 | 2.553111217 |
| STEAP3 | 6.366392283 | -1.866161197 | 9.29E-06 | 5.031949718 |
| RP11-208N14.4 | 3.180243868 | -1.866296263 | 0.003237185 | 2.48983249 |
| LRRIQ1 | 4.425050903 | -1.866478916 | 0.000326222 | 3.486487215 |
| KLHL31 | 8.502904885 | -1.868191873 | 1.80E-07 | 6.744327644 |
| FBXL21 | 1.684527603 | -1.868410727 | 0.049820339 | 1.302593324 |
| MCOLN2 | 6.888770721 | -1.869109931 | 3.61E-06 | 5.442709362 |
| CEACAM4 | 10.47723773 | -1.870372482 | 5.45E-09 | 8.263443054 |
| EXOC3L2 | 3.842105345 | -1.870529926 | 0.000944315 | 3.024882961 |
| HJURP | 7.254692614 | -1.871413906 | 1.86E-06 | 5.729937566 |
| EXO1 | 10.01367578 | -1.873370226 | 1.19E-08 | 7.92543722 |
| PROK2 | 6.418125001 | -1.875227035 | 8.46E-06 | 5.072853223 |
| PAPPA2 | 4.631016631 | -1.877372307 | 0.000222987 | 3.65172074 |
| IL1RN | 2.401773136 | -1.879299804 | 0.013766079 | 1.861189754 |
| KIF14 | 9.837459486 | -1.87988274 | 1.58E-08 | 7.800610544 |
| CDH19 | 6.546382232 | -1.882690841 | 6.69E-06 | 5.174446 |
| TMSB4XP4 | 2.785452553 | -1.884246443 | 0.006709727 | 2.173295121 |
| VAV3 | 9.717122212 | -1.885779157 | 1.97E-08 | 7.705384934 |
| AOX1 | 7.266676965 | -1.886255206 | 1.83E-06 | 5.737968349 |
| SLFN12L | 5.337109621 | -1.886788647 | 6.09E-05 | 4.215220618 |
| SNAI2 | 9.811712183 | -1.887167261 | 1.65E-08 | 7.781881844 |
| HOXD9 | 2.767664457 | -1.890272511 | 0.006924399 | 2.159617925 |
| FAM92A1P1 | 6.18951627 | -1.890730456 | 1.28E-05 | 4.892562289 |
| RP11-77K12.4 | 6.913959951 | -1.891063497 | 3.44E-06 | 5.463084532 |
| HDC | 3.134290419 | -1.892183972 | 0.003525687 | 2.452756295 |
| MSN | 14.06823934 | -1.893668793 | 1.09E-11 | 10.96201329 |
| HLA-DOA | 6.704987693 | -1.894183559 | 5.01E-06 | 5.300283674 |
| PLAT | 5.148852543 | -1.89482537 | 8.61E-05 | 4.064962707 |
| AC083862.6 | 3.755419844 | -1.8949591 | 0.001105912 | 2.956279244 |
| SIRPAP1 | 4.219874393 | -1.897359657 | 0.000475984 | 3.322407609 |
| RP11-93B14.5 | 2.215202209 | -1.897926083 | 0.01930197 | 1.714398356 |
| PLBD1 | 16.20679609 | -1.898333567 | 3.93E-13 | 12.40545895 |
| IL24 | 7.900494232 | -1.898893754 | 5.55E-07 | 6.255536023 |
| LSM12P1 | 11.06103082 | -1.899305482 | 1.94E-09 | 8.711828448 |
| GBP1P1 | 5.660436867 | -1.899409026 | 3.39E-05 | 4.47018355 |
| C11orf89 | 5.564284776 | -1.901123659 | 4.00E-05 | 4.397871653 |
| TNNI1 | 3.488836899 | -1.901735277 | 0.001820432 | 2.739825469 |
| FAM115C | 9.067738082 | -1.901806675 | 6.40E-08 | 7.19378925 |
| SLC5A9 | 5.462015834 | -1.902148334 | 4.82E-05 | 4.31682966 |
| TNFSF15 | 12.02004904 | -1.902899453 | 4.03E-10 | 9.394638441 |
| FGF5 | 4.842434685 | -1.905741712 | 0.000150019 | 3.823853475 |
| FILIP1L | 6.977408223 | -1.907097246 | 3.12E-06 | 5.505740857 |
| ZBTB32 | 7.731498337 | -1.907564388 | 7.67E-07 | 6.115168683 |
| RP11-490K7.4 | 6.533553835 | -1.90813656 | 6.85E-06 | 5.164117707 |
| CAV1 | 7.021638136 | -1.908943898 | 2.87E-06 | 5.542589331 |
| IGFBP2 | 4.365061073 | -1.909540955 | 0.000364288 | 3.438555101 |
| LINC00475 | 2.189640744 | -1.910970626 | 0.020224806 | 1.694115646 |
| FSTL1 | 10.91722919 | -1.911618943 | 2.53E-09 | 8.59768532 |
| ITIH1 | 3.761402745 | -1.911804623 | 0.0010958 | 2.960268775 |
| BTBD18 | 7.336309995 | -1.912981957 | 1.59E-06 | 5.797300717 |
| SLC38A4 | 4.689217843 | -1.914378982 | 0.00020007 | 3.698818273 |
| CTD-2201G3.1 | 10.39588765 | -1.914425871 | 6.21E-09 | 8.207108357 |
| CHRNA6 | 6.706142896 | -1.91753784 | 5.01E-06 | 5.300283674 |
| KIR3DX1 | 7.192531693 | -1.920101492 | 2.08E-06 | 5.682532372 |
| ANKRD34B | 5.13681601 | -1.921433206 | 8.76E-05 | 4.057587353 |
| BTLA | 4.203869314 | -1.921506127 | 0.000490902 | 3.309005578 |
| C7 | 7.501861196 | -1.923508201 | 1.17E-06 | 5.931539645 |
| CDCP1 | 13.39434058 | -1.925820887 | 3.80E-11 | 10.4203993 |
| ZNF683 | 5.105510784 | -1.92775548 | 9.23E-05 | 4.034747603 |
| NKX2-4 | 1.688229923 | -1.929241043 | 0.049529389 | 1.305137027 |
| ORC1 | 10.38318811 | -1.931948525 | 6.34E-09 | 8.197850642 |
| RRM2 | 6.455835629 | -1.934887157 | 7.81E-06 | 5.107290814 |
| BUB1B | 4.302649117 | -1.935650777 | 0.000408201 | 3.389125989 |
| SLC6A4 | 6.486646555 | -1.937816406 | 7.43E-06 | 5.1288567 |
| TUBA1C | 6.316458144 | -1.937839494 | 1.02E-05 | 4.989790177 |
| ILDR1 | 7.12873387 | -1.938236832 | 2.34E-06 | 5.630036976 |
| ITGAD | 6.094321693 | -1.940876714 | 1.53E-05 | 4.815633418 |
| FAM111B | 7.687662639 | -1.941245913 | 8.27E-07 | 6.082696344 |
| CDCA8 | 9.684240212 | -1.942455188 | 2.10E-08 | 7.677744816 |
| LINC00578 | 6.228608457 | -1.942582303 | 1.19E-05 | 4.923431441 |
| PYHIN1 | 5.216033724 | -1.943956662 | 7.67E-05 | 4.115350691 |
| RBMS1P1 | 2.175863839 | -1.946218867 | 0.020719716 | 1.683616202 |
| MEIS3P2 | 11.07270166 | -1.946990782 | 1.93E-09 | 8.71374247 |
| GPR82 | 6.843847828 | -1.947552087 | 3.91E-06 | 5.408078066 |
| TEX19 | 5.15070656 | -1.948640571 | 8.58E-05 | 4.066524226 |
| DPEP1 | 4.161146593 | -1.950307336 | 0.000529688 | 3.275979903 |
| WEE1 | 10.35120448 | -1.950484892 | 6.65E-09 | 8.176873008 |
| RP11-35D5.1 | 3.682768122 | -1.952042632 | 0.001264521 | 2.898073876 |
| CNOT6LP1 | 5.372527529 | -1.95216641 | 5.72E-05 | 4.242357539 |
| SLC34A2 | 2.296672676 | -1.952745612 | 0.016614852 | 1.779503532 |
| BCAT1 | 10.13400868 | -1.954678281 | 9.82E-09 | 8.008021583 |
| MMP11 | 5.541801994 | -1.956707498 | 4.16E-05 | 4.380818697 |
| MELK | 8.212028543 | -1.95733648 | 3.08E-07 | 6.510752727 |
| GPR78 | 6.554980621 | -1.95761567 | 6.60E-06 | 5.18054064 |
| ERN2 | 2.820807941 | -1.958381567 | 0.006283865 | 2.201773178 |
| MAGEB17 | 6.69115037 | -1.960154383 | 5.14E-06 | 5.289170477 |
| CR1 | 5.268803236 | -1.961139425 | 6.93E-05 | 4.159221029 |
| DLX2 | 1.747550053 | -1.962640087 | 0.044630935 | 1.35036401 |
| SLAMF8 | 9.477528199 | -1.964164919 | 3.12E-08 | 7.506481103 |
| TXK | 7.515133278 | -1.965436916 | 1.14E-06 | 5.941279976 |
| CCNB2 | 7.21370494 | -1.965541416 | 1.99E-06 | 5.701056643 |
| CTC-303L1.1 | 3.509187611 | -1.967809948 | 0.001747941 | 2.757473112 |
| MYB | 10.87735108 | -1.968148005 | 2.69E-09 | 8.570705511 |
| FCRLA | 3.899522139 | -1.96917954 | 0.000852442 | 3.069335236 |
| FAM45B | 1.83689633 | -1.974762709 | 0.038067849 | 1.419441659 |
| LRAT | 6.593939446 | -1.975380874 | 6.17E-06 | 5.209758775 |
| TPO | 4.660404124 | -1.979115927 | 0.000212315 | 3.67301962 |
| ELL2P1 | 4.719554271 | -1.980761449 | 0.000189424 | 3.722564709 |
| ADAMTS15 | 3.360256706 | -1.981587771 | 0.002305987 | 2.637143112 |
| HLA-DRA | 8.212970621 | -1.982707319 | 3.08E-07 | 6.511019226 |
| MAP3K7CL | 6.024704125 | -1.983007226 | 1.73E-05 | 4.762194843 |
| XG | 2.134143984 | -1.983959868 | 0.022376867 | 1.650200722 |
| RAB38 | 11.20869069 | -1.989327168 | 1.50E-09 | 8.822535426 |
| CPA4 | 5.620540484 | -1.98935605 | 3.63E-05 | 4.440553334 |
| IL5 | 6.080162105 | -1.990322183 | 1.57E-05 | 4.803994336 |
| TROAP | 10.14607154 | -1.991423106 | 9.69E-09 | 8.013859122 |
| CDC42BPG | 4.694305174 | -1.994387277 | 0.000197854 | 3.703655738 |
| E2F8 | 9.331558617 | -1.995487296 | 4.00E-08 | 7.397435655 |
| CD180 | 13.49083778 | -1.995739842 | 3.23E-11 | 10.49098038 |
| PIPSL | 7.419936886 | -1.999362462 | 1.36E-06 | 5.86804558 |
| GPNMB | 7.632649694 | -2.003384132 | 9.12E-07 | 6.039815116 |
| CXCL11 | 6.05795691 | -2.005716517 | 1.65E-05 | 4.783742619 |
| ZNF648 | 6.805528706 | -2.006349052 | 4.13E-06 | 5.383823856 |
| NEIL3 | 8.87261817 | -2.007647199 | 9.02E-08 | 7.044573608 |
| FSCN3 | 6.302090398 | -2.007719813 | 1.04E-05 | 4.98093604 |
| SULF1 | 8.262392265 | -2.008755439 | 2.83E-07 | 6.548108036 |
| COL5A2 | 6.612151699 | -2.010774075 | 5.94E-06 | 5.226134075 |
| PPP1R8P1 | 6.866829867 | -2.011384505 | 3.75E-06 | 5.426109612 |
| FOXA3 | 6.798308737 | -2.012029966 | 4.19E-06 | 5.377967439 |
| C1orf200 | 7.62707162 | -2.012237414 | 9.20E-07 | 6.036046257 |
| LPAR3 | 4.030337459 | -2.013716343 | 0.000671195 | 3.173151582 |
| ALOX15B | 5.254941334 | -2.015214452 | 7.12E-05 | 4.147788408 |
| RP11-218L14.4 | 6.659755975 | -2.0208733 | 5.45E-06 | 5.263509722 |
| LOXL2 | 6.697821215 | -2.021283405 | 5.10E-06 | 5.292715059 |
| KIF4A | 10.29732445 | -2.022808619 | 7.31E-09 | 8.136270058 |
| BNIP3P1 | 8.622661362 | -2.024358276 | 1.44E-07 | 6.840396679 |
| AC015987.1 | 5.237354301 | -2.025605061 | 7.37E-05 | 4.132810542 |
| UBD | 4.810878151 | -2.026174771 | 0.000159987 | 3.795915423 |
| SIX3 | 3.166239548 | -2.027874045 | 0.00332098 | 2.47873373 |
| UMODL1 | 6.879852417 | -2.029992229 | 3.66E-06 | 5.436545939 |
| KCNE1 | 7.594108409 | -2.030805665 | 9.86E-07 | 6.00597061 |
| TAS1R1 | 6.97617016 | -2.031441248 | 3.14E-06 | 5.502981463 |
| GJA9 | 6.538894762 | -2.031863116 | 6.78E-06 | 5.168479977 |
| AQP7P1 | 2.579748981 | -2.031879679 | 0.009878051 | 2.005328748 |
| AC091814.3 | 2.670108505 | -2.031879679 | 0.008303136 | 2.080757841 |
| POLQ | 12.18150234 | -2.032360909 | 3.08E-10 | 9.51139151 |
| FN1 | 4.530828726 | -2.032531595 | 0.000268069 | 3.571753569 |
| KLHL40 | 6.170610847 | -2.032661092 | 1.33E-05 | 4.877102652 |
| TRAT1 | 3.643825122 | -2.033656398 | 0.001359604 | 2.866587417 |
| LOXL4 | 2.825121143 | -2.034315765 | 0.006233872 | 2.205242125 |
| TBX4 | 5.653675906 | -2.034440562 | 3.42E-05 | 4.466391484 |
| VIM | 6.268557774 | -2.035223013 | 1.11E-05 | 4.955982266 |
| ERP27 | 5.519986783 | -2.03627307 | 4.34E-05 | 4.362653811 |
| RP11-288L9.4 | 3.176097007 | -2.036808846 | 0.003263188 | 2.486357929 |
| CLEC3A | 3.612422069 | -2.037626357 | 0.00144201 | 2.841031821 |
| CD70 | 2.157965735 | -2.038378808 | 0.021391904 | 1.669750552 |
| RP11-567G24.1 | 4.39131706 | -2.03950989 | 0.000347488 | 3.459060567 |
| CD248 | 4.300079184 | -2.04053383 | 0.000410129 | 3.387079557 |
| PI15 | 2.313860196 | -2.042319295 | 0.016129753 | 1.792372272 |
| TMEM154 | 14.06473724 | -2.043022597 | 1.09E-11 | 10.96201329 |
| SEC63P1 | 6.825431193 | -2.04341615 | 4.00E-06 | 5.397662444 |
| CHI3L2 | 2.37187549 | -2.044310508 | 0.014529335 | 1.837754264 |
| EOMES | 11.17504346 | -2.045570877 | 1.59E-09 | 8.799742823 |
| RP11-289I10.2 | 1.837195443 | -2.046341153 | 0.038052116 | 1.419621189 |
| RDH10 | 4.702811184 | -2.049043618 | 0.000194639 | 3.71077123 |
| SPPL2C | 6.715628513 | -2.052718636 | 4.93E-06 | 5.307359789 |
| LRRC8E | 5.99386856 | -2.054933057 | 1.82E-05 | 4.739123664 |
| HAL | 4.357420421 | -2.055450554 | 0.000370062 | 3.43172597 |
| SPATC1 | 7.243419039 | -2.057353759 | 1.90E-06 | 5.722189219 |
| CD300LB | 7.169238196 | -2.057528035 | 2.18E-06 | 5.661692641 |
| CLSPN | 9.869347064 | -2.058206098 | 1.49E-08 | 7.826623977 |
| FAM86B2 | 6.253403259 | -2.058890572 | 1.14E-05 | 4.943278048 |
| E2F7 | 9.056105608 | -2.059481617 | 6.55E-08 | 7.183980604 |
| RRM2P3 | 3.653489015 | -2.060047896 | 0.001335157 | 2.87446752 |
| TPRG1-AS1 | 6.190132651 | -2.060560581 | 1.28E-05 | 4.892781522 |
| ANXA1 | 3.456481013 | -2.061383085 | 0.001927644 | 2.714973195 |
| TMEM71 | 5.974352686 | -2.065188398 | 1.90E-05 | 4.721429298 |
| C11orf42 | 7.347010396 | -2.066755735 | 1.57E-06 | 5.805409427 |
| SCIN | 5.474789444 | -2.067079069 | 4.72E-05 | 4.326396441 |
| THBD | 6.52413108 | -2.069060771 | 6.94E-06 | 5.158511414 |
| CLNK | 5.017633097 | -2.070687128 | 0.000109306 | 3.961354112 |
| EHF | 5.438312691 | -2.071071914 | 5.03E-05 | 4.298314647 |
| CEACAM3 | 3.071155338 | -2.074548828 | 0.003953377 | 2.403031753 |
| SLC22A12 | 2.123267143 | -2.076956221 | 0.022827156 | 1.641548192 |
| ZNF849P | 7.773611314 | -2.077461803 | 7.03E-07 | 6.15317587 |
| SDR9C7 | 5.628043091 | -2.077590667 | 3.57E-05 | 4.447271449 |
| SPATA12 | 7.726518819 | -2.077941972 | 7.70E-07 | 6.11378943 |
| MEDAG | 2.437893341 | -2.078508039 | 0.012860259 | 1.890750272 |
| IQGAP2 | 10.70512068 | -2.081817162 | 3.76E-09 | 8.424720677 |
| NUDT4P1 | 5.762003558 | -2.081881553 | 2.82E-05 | 4.550081746 |
| BUB1 | 9.910983731 | -2.082209941 | 1.40E-08 | 7.854240658 |
| ANXA2 | 6.397115223 | -2.082809501 | 8.78E-06 | 5.056304023 |
| GSX2 | 3.06655999 | -2.085862641 | 0.003990539 | 2.398968467 |
| POU2F3 | 4.860650812 | -2.086723729 | 0.000145444 | 3.837304999 |
| ESPL1 | 10.64687211 | -2.09020281 | 4.03E-09 | 8.394552646 |
| RP11-117D22.2 | 4.939403297 | -2.092457751 | 0.000126467 | 3.898023796 |
| C1orf65 | 8.239788203 | -2.092534167 | 2.94E-07 | 6.531962317 |
| AC024940.1 | 6.503195696 | -2.092574384 | 7.20E-06 | 5.142529987 |
| LAX1 | 9.441261426 | -2.094206261 | 3.31E-08 | 7.480784063 |
| SLAMF9 | 4.801800123 | -2.095156124 | 0.000162553 | 3.789003908 |
| ABCA13 | 4.252296373 | -2.0983422 | 0.000449092 | 3.347664963 |
| CTHRC1 | 5.657597696 | -2.098904787 | 3.39E-05 | 4.46926467 |
| RNASE10 | 8.424477346 | -2.099296566 | 2.09E-07 | 6.680382068 |
| PP2D1 | 7.623599975 | -2.099806111 | 9.26E-07 | 6.033272163 |
| TXNDC2 | 4.195349596 | -2.102252444 | 0.000498228 | 3.30257219 |
| LAMP3 | 9.469651839 | -2.103533297 | 3.15E-08 | 7.501270413 |
| RP11-121L10.3 | 2.285879151 | -2.105134141 | 0.016953664 | 1.770736429 |
| VCAM1 | 8.643519948 | -2.107583749 | 1.40E-07 | 6.853954158 |
| ITPRIPL1 | 15.04762083 | -2.108069119 | 2.13E-12 | 11.67221128 |
| THSD7B | 9.413807649 | -2.108703392 | 3.48E-08 | 7.458000789 |
| CD163 | 5.22070237 | -2.10883524 | 7.61E-05 | 4.11850274 |
| SGOL1 | 10.74129358 | -2.110859521 | 3.54E-09 | 8.450522458 |
| DTL | 8.776033009 | -2.11167082 | 1.07E-07 | 6.970004538 |
| ISL2 | 4.66954996 | -2.113136462 | 0.000207998 | 3.681940084 |
| PLEKHG6 | 8.762760418 | -2.114886932 | 1.10E-07 | 6.957599459 |
| CKAP2L | 9.981677192 | -2.116590305 | 1.23E-08 | 7.908515942 |
| LMOD3 | 9.318653218 | -2.118591461 | 4.11E-08 | 7.386541035 |
| MKI67 | 8.321470267 | -2.118703189 | 2.54E-07 | 6.595579135 |
| EBF3 | 2.936783425 | -2.124714472 | 0.00509222 | 2.293092834 |
| DLGAP5 | 7.096631976 | -2.125111223 | 2.48E-06 | 5.606130046 |
| BMP5 | 5.827651415 | -2.130427017 | 2.50E-05 | 4.602856085 |
| BDKRB1 | 5.416830341 | -2.13334595 | 5.25E-05 | 4.279680298 |
| TMEM213 | 5.830229979 | -2.136650391 | 2.49E-05 | 4.604630188 |
| IGFBP3 | 2.959596848 | -2.139181784 | 0.004882932 | 2.31131931 |
| CCR5 | 10.58623916 | -2.139325148 | 4.51E-09 | 8.345556032 |
| IRX5 | 5.676186262 | -2.139770168 | 3.29E-05 | 4.482437421 |
| RP11-333E13.4 | 4.667377823 | -2.141121095 | 0.000208757 | 3.680359689 |
| EPX | 10.90015269 | -2.144236092 | 2.60E-09 | 8.584846581 |
| CCR6 | 6.588243814 | -2.147329405 | 6.23E-06 | 5.205784325 |
| PCK1 | 6.632060488 | -2.147731511 | 5.75E-06 | 5.239999717 |
| NSUN7 | 8.119147323 | -2.149404606 | 3.65E-07 | 6.437212802 |
| SCNN1A | 6.802644753 | -2.149636926 | 4.18E-06 | 5.378896656 |
| TRH | 2.259227014 | -2.153525284 | 0.017754243 | 1.75069783 |
| DNM1P46 | 9.787637244 | -2.156092473 | 1.74E-08 | 7.759661696 |
| HMGN2P46 | 6.961700091 | -2.157054154 | 3.19E-06 | 5.496247497 |
| PSME2P2 | 11.84249126 | -2.157331193 | 5.33E-10 | 9.273079786 |
| TCL6 | 2.545557167 | -2.158362647 | 0.010508573 | 1.978456243 |
| HFE2 | 6.041005849 | -2.158725543 | 1.69E-05 | 4.771838802 |
| UGT3A2 | 5.702854822 | -2.158929633 | 3.11E-05 | 4.506831042 |
| NEUROG2 | 1.746501256 | -2.158959468 | 0.044721218 | 1.349486376 |
| DMRT3 | 4.478063096 | -2.159709901 | 0.000297057 | 3.527160726 |
| AC107021.1 | 5.454441905 | -2.16229711 | 4.89E-05 | 4.310618038 |
| AC011294.3 | 5.271331349 | -2.163529144 | 6.90E-05 | 4.160983326 |
| NPNT | 4.202360272 | -2.164402013 | 0.000492647 | 3.307464444 |
| CYP2F1 | 5.458206492 | -2.164443005 | 4.86E-05 | 4.31370818 |
| RP3-460G2.2 | 2.793175478 | -2.164764238 | 0.006606963 | 2.179998121 |
| HSD3B2 | 4.858206898 | -2.16560329 | 0.000146173 | 3.835132244 |
| RP11-436G20.1 | 7.086766168 | -2.167527515 | 2.52E-06 | 5.599133872 |
| ABCA12 | 6.365128225 | -2.170313518 | 9.30E-06 | 5.0314347 |
| RLN1 | 7.168396008 | -2.17076393 | 2.18E-06 | 5.661147005 |
| CD2 | 5.253914374 | -2.172780552 | 7.12E-05 | 4.147592913 |
| MOCOS | 9.46752229 | -2.173758619 | 3.15E-08 | 7.501270413 |
| BEST2 | 5.600773384 | -2.177049816 | 3.74E-05 | 4.426925005 |
| TDRD1 | 7.659401616 | -2.177376329 | 8.72E-07 | 6.059503563 |
| PM20D1 | 6.826239046 | -2.178170739 | 4.00E-06 | 5.397662444 |
| SOCS3 | 4.11163204 | -2.179502458 | 0.000581418 | 3.235511187 |
| PRSS37 | 6.14662796 | -2.1795825 | 1.39E-05 | 4.857789586 |
| TNFAIP6 | 8.284395922 | -2.18265556 | 2.74E-07 | 6.562933157 |
| FKBP5 | 10.01580044 | -2.183304579 | 1.19E-08 | 7.92543722 |
| MPZL2 | 8.970930814 | -2.184735871 | 7.61E-08 | 7.118556782 |
| NLRP9 | 3.493493811 | -2.185910373 | 0.00180315 | 2.743968084 |
| ADAM29 | 3.896228242 | -2.189484802 | 0.00085686 | 3.067090298 |
| KLRG2 | 6.345868514 | -2.189876484 | 9.65E-06 | 5.015665722 |
| KCNJ15 | 7.452099998 | -2.190249354 | 1.28E-06 | 5.892156282 |
| ROR1 | 11.98502667 | -2.190647295 | 4.29E-10 | 9.367153791 |
| MCM10 | 9.949473144 | -2.191199033 | 1.31E-08 | 7.88172629 |
| CHRND | 8.635945612 | -2.191254528 | 1.42E-07 | 6.847775798 |
| ZNF80 | 4.667246328 | -2.198398297 | 0.000208757 | 3.680359689 |
| CENPF | 10.16761672 | -2.200737319 | 9.36E-09 | 8.028799472 |
| C11orf63 | 10.08471377 | -2.203546103 | 1.06E-08 | 7.976291179 |
| AL360004.1 | 8.144375531 | -2.208519322 | 3.47E-07 | 6.45919621 |
| HAVCR1 | 8.792994311 | -2.209104438 | 1.05E-07 | 6.979986274 |
| TUBB2BP1 | 2.181916838 | -2.210983724 | 0.020509614 | 1.688042509 |
| KIF18A | 12.17744527 | -2.211381479 | 3.08E-10 | 9.51139151 |
| ANKRD22 | 8.338051342 | -2.212340452 | 2.46E-07 | 6.609844966 |
| PRSS23 | 10.04743176 | -2.213326851 | 1.12E-08 | 7.950480443 |
| G6PC2 | 7.65173609 | -2.214114535 | 8.84E-07 | 6.053459949 |
| HCAR1 | 5.78349607 | -2.215883585 | 2.71E-05 | 4.567653914 |
| P4HA3 | 6.869949451 | -2.218148293 | 3.73E-06 | 5.428052267 |
| CDCA2 | 10.20200504 | -2.218942568 | 8.77E-09 | 8.057008563 |
| RIMKLBP1 | 8.369019461 | -2.222178235 | 2.32E-07 | 6.634053574 |
| ONECUT1 | 6.963382504 | -2.224718296 | 3.19E-06 | 5.496247497 |
| GNG12 | 11.0960776 | -2.226716979 | 1.86E-09 | 8.731068782 |
| OSMR | 11.59788119 | -2.22745517 | 7.98E-10 | 9.098180008 |
| ACPP | 12.15951206 | -2.228319836 | 3.13E-10 | 9.503945354 |
| VGLL3 | 5.393935171 | -2.229923159 | 5.50E-05 | 4.259622141 |
| ISM2 | 6.999928722 | -2.230061466 | 3.00E-06 | 5.523518556 |
| FAM180A | 2.722717262 | -2.23020749 | 0.007525172 | 2.123483588 |
| H3F3C | 6.406431678 | -2.231611629 | 8.63E-06 | 5.064154027 |
| FASLG | 5.169118818 | -2.233165666 | 8.32E-05 | 4.080050119 |
| VNN1 | 13.37688723 | -2.235368177 | 3.80E-11 | 10.4203993 |
| GSDMA | 11.7435767 | -2.237113858 | 6.20E-10 | 9.20779121 |
| AVPR2 | 7.984659758 | -2.241052539 | 4.74E-07 | 6.324532014 |
| DLX5 | 2.442009098 | -2.242269385 | 0.012767397 | 1.893897646 |
| EIF4BP3 | 9.961590991 | -2.243795855 | 1.29E-08 | 7.890828676 |
| OR10AD1 | 5.599350978 | -2.245582859 | 3.75E-05 | 4.426219655 |
| CATSPERB | 3.783551088 | -2.248627731 | 0.001054018 | 2.977152145 |
| GSG2 | 11.66919636 | -2.248890694 | 7.01E-10 | 9.154443519 |
| IRX4 | 4.248996932 | -2.256390981 | 0.000451962 | 3.34489854 |
| SLAMF6 | 6.900703149 | -2.256400159 | 3.53E-06 | 5.451647422 |
| P2RX3 | 6.381282833 | -2.256598312 | 9.04E-06 | 5.0438474 |
| HILS1 | 7.020354209 | -2.256816546 | 2.87E-06 | 5.541910283 |
| CXCR6 | 5.076040246 | -2.256835185 | 9.78E-05 | 4.009854942 |
| RP11-54D18.3 | 9.209743316 | -2.260389105 | 5.01E-08 | 7.300359992 |
| ITGA4 | 11.72934328 | -2.261963425 | 6.20E-10 | 9.20779121 |
| SPINK8 | 7.366171623 | -2.262329695 | 1.50E-06 | 5.822760672 |
| NLRP6 | 7.463453873 | -2.265476818 | 1.26E-06 | 5.900038214 |
| MFAP5 | 3.155310915 | -2.266298265 | 0.003381335 | 2.470911787 |
| SLC25A2 | 5.975071077 | -2.266333974 | 1.90E-05 | 4.721429298 |
| LMX1B | 5.118926647 | -2.267176376 | 9.03E-05 | 4.044192481 |
| EYA4 | 5.454011847 | -2.269141894 | 4.90E-05 | 4.309701005 |
| MAFA | 4.488765815 | -2.269842841 | 0.000291151 | 3.535881798 |
| NYX | 6.458303635 | -2.274072501 | 7.78E-06 | 5.10926898 |
| LILRA5 | 8.030825111 | -2.274958939 | 4.33E-07 | 6.36313978 |
| FLNC | 7.809766321 | -2.277174789 | 6.53E-07 | 6.185274142 |
| SOD2 | 6.293319266 | -2.277745098 | 1.06E-05 | 4.974706354 |
| ANGPTL7 | 3.98187247 | -2.278669396 | 0.000735566 | 3.133378302 |
| FAM83D | 6.108719801 | -2.280505547 | 1.49E-05 | 4.827278225 |
| USH1G | 7.047377208 | -2.280990631 | 2.72E-06 | 5.565904396 |
| FCRL3 | 3.707041634 | -2.281510107 | 0.0012074 | 2.918148681 |
| CAV3 | 6.546365177 | -2.282555505 | 6.69E-06 | 5.174446 |
| SLC16A6P1 | 6.280748355 | -2.284090767 | 1.08E-05 | 4.966357642 |
| EMR1 | 4.470452625 | -2.284461531 | 0.000300248 | 3.522520299 |
| ESCO2 | 8.843477402 | -2.289105843 | 9.50E-08 | 7.022459294 |
| ERCC6L | 8.569990063 | -2.29059523 | 1.59E-07 | 6.798182051 |
| F13A1 | 3.873694422 | -2.290737014 | 0.000891624 | 3.049818045 |
| SLITRK6 | 6.171819263 | -2.291529098 | 1.32E-05 | 4.877941548 |
| C19orf59 | 2.204928358 | -2.292562918 | 0.019667871 | 1.706242645 |
| LRRC14B | 6.73195691 | -2.292874869 | 4.77E-06 | 5.321135384 |
| MSR1 | 11.80703085 | -2.293189115 | 5.49E-10 | 9.26069846 |
| ZNF750 | 7.241854904 | -2.293445144 | 1.90E-06 | 5.722186569 |
| LHX9 | 8.26186402 | -2.29609134 | 2.83E-07 | 6.548108036 |
| IGHD | 2.958171353 | -2.297267766 | 0.004894029 | 2.310333456 |
| TXLNB | 10.86204857 | -2.298860356 | 2.74E-09 | 8.562432337 |
| RAG1 | 11.2527135 | -2.300116916 | 1.43E-09 | 8.84324921 |
| TTLL2 | 6.43835433 | -2.305176661 | 8.10E-06 | 5.091276946 |
| VEGFA | 3.361217679 | -2.305353381 | 0.002301532 | 2.637982945 |
| MYLK3 | 8.714526391 | -2.305719769 | 1.21E-07 | 6.915878932 |
| QRFP | 5.552308768 | -2.310294105 | 4.07E-05 | 4.389881779 |
| GPA33 | 10.36111331 | -2.310697661 | 6.56E-09 | 8.183310587 |
| GPR157 | 8.015595097 | -2.314072882 | 4.47E-07 | 6.349685842 |
| FAM129A | 11.40119138 | -2.316403244 | 1.06E-09 | 8.97389714 |
| TREML3P | 3.993118218 | -2.317086024 | 0.000720781 | 3.142196785 |
| FCGBP | 6.238818623 | -2.317113102 | 1.17E-05 | 4.931529334 |
| MYO3A | 6.948886834 | -2.317425809 | 3.25E-06 | 5.487789024 |
| TSPYL6 | 5.888422912 | -2.318488714 | 2.23E-05 | 4.652626907 |
| VWA5B1 | 4.068952273 | -2.325005085 | 0.000627427 | 3.202436505 |
| KLHL10 | 7.008568306 | -2.326923005 | 2.94E-06 | 5.531606933 |
| LIPH | 7.991582682 | -2.326923005 | 4.68E-07 | 6.329829468 |
| MFSD6L | 6.504208366 | -2.326923005 | 7.19E-06 | 5.14339047 |
| LDHAL6B | 6.148864877 | -2.329183524 | 1.38E-05 | 4.858729907 |
| WNT16 | 2.766644924 | -2.329712292 | 0.006936802 | 2.158840723 |
| CD1C | 6.686913543 | -2.330717077 | 5.15E-06 | 5.287803854 |
| GLI1 | 6.129724506 | -2.331013858 | 1.44E-05 | 4.8426944 |
| ROR2 | 10.53648258 | -2.331106583 | 4.93E-09 | 8.306754332 |
| GATA6 | 7.887604335 | -2.331412183 | 5.68E-07 | 6.245975203 |
| TLR8 | 15.08698032 | -2.333498763 | 2.13E-12 | 11.67221128 |
| KLF17 | 5.557743335 | -2.335033331 | 4.04E-05 | 4.393560514 |
| ANGPT2 | 7.819594828 | -2.335167994 | 6.42E-07 | 6.192759874 |
| GCSAML | 7.830319119 | -2.335924065 | 6.33E-07 | 6.198550553 |
| KCNJ13 | 7.479353431 | -2.340391867 | 1.22E-06 | 5.913781758 |
| PP13439 | 7.857076729 | -2.341084923 | 6.00E-07 | 6.221867175 |
| C1orf147 | 5.192028929 | -2.341101901 | 7.97E-05 | 4.098477091 |
| PDE6A | 6.722070246 | -2.344368779 | 4.88E-06 | 5.311320136 |
| ENPEP | 7.666972859 | -2.34654056 | 8.58E-07 | 6.066597791 |
| CEP55 | 11.88904971 | -2.35138271 | 4.90E-10 | 9.309809592 |
| PDC | 4.387365556 | -2.356353725 | 0.000350122 | 3.455780225 |
| ZNRF4 | 3.864774568 | -2.357485289 | 0.000905995 | 3.042874019 |
| AC064875.2 | 3.445978639 | -2.358316366 | 0.001966367 | 2.70633552 |
| COL15A1 | 6.157300255 | -2.358376062 | 1.36E-05 | 4.865143836 |
| LY9 | 6.815925985 | -2.358847279 | 4.09E-06 | 5.388607468 |
| PRR15L | 7.284961357 | -2.359700601 | 1.76E-06 | 5.753673748 |
| TFPI | 9.096645936 | -2.360045525 | 6.05E-08 | 7.218013033 |
| CLIC6 | 3.024011823 | -2.360058389 | 0.004319817 | 2.364534636 |
| PVRL4 | 7.899666811 | -2.361499099 | 5.55E-07 | 6.255536023 |
| FOLR3 | 6.882104684 | -2.362086205 | 3.64E-06 | 5.438578706 |
| CD96 | 6.049060467 | -2.368371344 | 1.66E-05 | 4.778752024 |
| IGLV5-52 | 10.88000304 | -2.368819077 | 2.69E-09 | 8.570705511 |
| MEOX1 | 5.78983195 | -2.369825508 | 2.68E-05 | 4.571856172 |
| KIF20A | 11.05103194 | -2.370689241 | 1.96E-09 | 8.707025989 |
| TRIML2 | 3.381557506 | -2.371590319 | 0.002212858 | 2.655046387 |
| MUC3A | 5.601004274 | -2.371766285 | 3.74E-05 | 4.426925005 |
| SOCS2 | 4.70649568 | -2.372517969 | 0.000194057 | 3.712070102 |
| SMCO1 | 4.864219991 | -2.37380948 | 0.000144792 | 3.839256808 |
| TAS2R3 | 7.224512407 | -2.374004289 | 1.94E-06 | 5.711106023 |
| BTNL8 | 4.908790905 | -2.376561184 | 0.000133182 | 3.875553776 |
| GNAT2 | 8.149919124 | -2.379687196 | 3.45E-07 | 6.462460648 |
| EIF2S3L | 8.269309078 | -2.381625866 | 2.80E-07 | 6.552939887 |
| NAMPT | 5.068286043 | -2.390511686 | 9.94E-05 | 4.002715236 |
| FTLP3 | 8.79799662 | -2.390695405 | 1.04E-07 | 6.983925163 |
| SH2D3A | 7.82783527 | -2.395834161 | 6.36E-07 | 6.196603041 |
| CXCL6 | 4.188821979 | -2.39671447 | 0.000504633 | 3.297023983 |
| RP11-43F13.3 | 1.783865574 | -2.398788991 | 0.041825648 | 1.378557327 |
| LAMB4 | 8.620262461 | -2.400841056 | 1.45E-07 | 6.838147705 |
| TREM1 | 3.46229649 | -2.407819975 | 0.001908093 | 2.719400424 |
| C3orf55 | 5.758094432 | -2.40942126 | 2.84E-05 | 4.546577111 |
| FREM3 | 9.381323251 | -2.413330164 | 3.67E-08 | 7.434774428 |
| HRNR | 5.925050793 | -2.41917481 | 2.09E-05 | 4.679708031 |
| C3orf20 | 10.67821974 | -2.419815188 | 3.87E-09 | 8.412047228 |
| F2RL3 | 5.651209464 | -2.420790718 | 3.42E-05 | 4.465494135 |
| COL14A1 | 6.944446191 | -2.422059211 | 3.29E-06 | 5.483409862 |
| SCNN1G | 5.960712605 | -2.426523314 | 1.94E-05 | 4.711760005 |
| CXCR2P1 | 6.742516652 | -2.429892816 | 4.69E-06 | 5.328854698 |
| IRX6 | 4.580396091 | -2.430015195 | 0.00024557 | 3.609824498 |
| S1PR3 | 11.81758713 | -2.436000853 | 5.45E-10 | 9.26386158 |
| CD3G | 13.30964482 | -2.438737411 | 3.88E-11 | 10.41144446 |
| RPA4 | 6.180364275 | -2.440011654 | 1.30E-05 | 4.885060435 |
| CD1E | 3.99151223 | -2.444127762 | 0.000722915 | 3.140912557 |
| HOXA1 | 6.320928423 | -2.452327418 | 1.02E-05 | 4.992852861 |
| HEMGN | 3.780039755 | -2.455027831 | 0.001060427 | 2.974519166 |
| RP11-443P15.2 | 1.729974073 | -2.455740889 | 0.046062608 | 1.33665148 |
| RP11-423C15.3 | 6.463585388 | -2.460189536 | 7.71E-06 | 5.112754266 |
| GAS2L3 | 13.31944903 | -2.461937057 | 3.88E-11 | 10.41144446 |
| CD93 | 11.16296245 | -2.462380978 | 1.61E-09 | 8.79295758 |
| COL4A2 | 5.07053581 | -2.466853004 | 9.89E-05 | 4.004996557 |
| TMEM252 | 7.858851472 | -2.468624131 | 5.97E-07 | 6.224014732 |
| MRGPRE | 6.230933347 | -2.4695274 | 1.19E-05 | 4.925179826 |
| SPATA18 | 2.824454526 | -2.472848616 | 0.006239522 | 2.204848699 |
| DTHD1 | 4.419793978 | -2.475051868 | 0.000329241 | 3.482486252 |
| COL6A3 | 4.046980344 | -2.475283257 | 0.000651217 | 3.186274595 |
| HCAR2 | 10.69839606 | -2.475564762 | 3.76E-09 | 8.424720677 |
| DNAH11 | 6.914498847 | -2.479201504 | 3.44E-06 | 5.463084532 |
| FCGR2B | 4.828158451 | -2.481374308 | 0.000154466 | 3.811168499 |
| C1orf116 | 8.670076656 | -2.483489623 | 1.33E-07 | 6.876736952 |
| SLC16A12 | 5.354534583 | -2.488253454 | 5.92E-05 | 4.227989424 |
| IL22RA1 | 8.102434886 | -2.495426716 | 3.77E-07 | 6.423685279 |
| SP8 | 1.813935309 | -2.49691357 | 0.039672572 | 1.401509643 |
| ANKRD33 | 5.625501985 | -2.497228068 | 3.60E-05 | 4.444285281 |
| ICOS | 4.787350214 | -2.497859954 | 0.000166525 | 3.778521084 |
| HUS1B | 6.504265263 | -2.501854195 | 7.19E-06 | 5.14339047 |
| ASPM | 11.4342564 | -2.502567591 | 1.03E-09 | 8.988090392 |
| PABPC3 | 15.41200678 | -2.503958977 | 1.47E-12 | 11.83268834 |
| DMRTA2 | 3.554542764 | -2.505711906 | 0.001605146 | 2.794485381 |
| ADAM12 | 5.983943044 | -2.509454076 | 1.87E-05 | 4.728470946 |
| C6 | 2.62261756 | -2.511223322 | 0.009087872 | 2.041537794 |
| CHRNA1 | 3.975792332 | -2.511342257 | 0.000743727 | 3.128586615 |
| DKK1 | 3.596804963 | -2.518331373 | 0.001483727 | 2.828645919 |
| FAM183B | 3.523242792 | -2.519083225 | 0.001702402 | 2.768937824 |
| EBF2 | 6.200377522 | -2.51964777 | 1.26E-05 | 4.900269266 |
| C14orf39 | 2.61333965 | -2.520236919 | 0.009256244 | 2.033565203 |
| FNDC1 | 4.889113941 | -2.52139859 | 0.000137407 | 3.861990931 |
| TGFB2 | 6.161644422 | -2.525011621 | 1.35E-05 | 4.869085434 |
| SFTPB | 3.096164948 | -2.526558345 | 0.003784111 | 2.422036117 |
| PTGER2 | 13.11516711 | -2.527204968 | 5.83E-11 | 10.23457394 |
| GATA3 | 7.371663931 | -2.527815961 | 1.49E-06 | 5.827039655 |
| P2RY2 | 12.42831065 | -2.529981077 | 2.02E-10 | 9.693788511 |
| GCM1 | 4.368812217 | -2.531710833 | 0.000362398 | 3.440814803 |
| ANXA2P2 | 5.400341332 | -2.535642873 | 5.43E-05 | 4.265185462 |
| LOXHD1 | 6.037837691 | -2.539708266 | 1.70E-05 | 4.769783828 |
| TCHH | 9.137344353 | -2.540752605 | 5.61E-08 | 7.251398723 |
| KLK1 | 5.908706362 | -2.54164783 | 2.14E-05 | 4.669746825 |
| FPR2 | 10.06797178 | -2.543572326 | 1.08E-08 | 7.965554443 |
| FAM160A1 | 9.412338217 | -2.546478659 | 3.48E-08 | 7.458000789 |
| GPR18 | 7.298933108 | -2.550194571 | 1.72E-06 | 5.764235346 |
| ACTL8 | 7.431590339 | -2.552612483 | 1.33E-06 | 5.876683246 |
| CCR7 | 8.453134249 | -2.553660357 | 1.98E-07 | 6.703803335 |
| MC5R | 9.103649437 | -2.55540576 | 6.00E-08 | 7.221742216 |
| COL1A2 | 2.963770543 | -2.560670154 | 0.004849496 | 2.314303404 |
| RXFP3 | 6.282851807 | -2.561597624 | 1.08E-05 | 4.967434256 |
| GRPR | 10.8548396 | -2.563640259 | 2.77E-09 | 8.557572496 |
| PRLR | 4.414335482 | -2.564308315 | 0.000332814 | 3.477798626 |
| HOXB5 | 2.700887265 | -2.565133632 | 0.007860462 | 2.104551953 |
| CD40LG | 6.167617922 | -2.569221121 | 1.34E-05 | 4.87434686 |
| MXRA5 | 10.02105482 | -2.576470178 | 1.18E-08 | 7.927027829 |
| CSNK1G2-AS1 | 6.151760923 | -2.578753594 | 1.38E-05 | 4.860459411 |
| PRDM6 | 12.45688578 | -2.580381447 | 2.01E-10 | 9.697117811 |
| IL8 | 2.680191241 | -2.583245885 | 0.008140894 | 2.089327884 |
| USP41 | 5.85478119 | -2.583370588 | 2.38E-05 | 4.623743066 |
| NPY6R | 7.048928996 | -2.584737362 | 2.71E-06 | 5.567152173 |
| METTL7B | 6.29644954 | -2.58992398 | 1.05E-05 | 4.977179313 |
| TKTL2 | 5.594805385 | -2.591434069 | 3.77E-05 | 4.423466126 |
| TFAP2C | 3.152265688 | -2.591566957 | 0.003399935 | 2.468529398 |
| SBSN | 5.335112601 | -2.594527511 | 6.11E-05 | 4.213941763 |
| FGFBP2 | 3.011197914 | -2.594882449 | 0.004437439 | 2.352867591 |
| RAD51AP2 | 5.638830984 | -2.596505058 | 3.51E-05 | 4.454870814 |
| CXCL9 | 3.295181397 | -2.598237918 | 0.002614 | 2.582694472 |
| SLAMF1 | 4.70811813 | -2.602661324 | 0.000193474 | 3.713378295 |
| COLEC10 | 5.203489248 | -2.605057603 | 7.84E-05 | 4.105554166 |
| CENPE | 14.26913048 | -2.605605571 | 9.29E-12 | 11.03203971 |
| HOXD8 | 5.051353283 | -2.605701329 | 0.000102336 | 3.98997354 |
| IGLV1-51 | 1.716755149 | -2.609181984 | 0.047093654 | 1.327037608 |
| ADAMDEC1 | 5.016973978 | -2.610978599 | 0.000109451 | 3.960779461 |
| RP3-369A17.4 | 12.2681538 | -2.61125551 | 2.62E-10 | 9.58090514 |
| SCN7A | 7.588096425 | -2.61462929 | 9.96E-07 | 6.001774695 |
| RXFP4 | 6.558095412 | -2.618715883 | 6.56E-06 | 5.183123898 |
| PGA4 | 1.733973306 | -2.623790813 | 0.045724164 | 1.339854223 |
| PDGFD | 10.12127316 | -2.625030934 | 9.95E-09 | 8.001983708 |
| OR1F1 | 6.96841539 | -2.633848464 | 3.18E-06 | 5.497565258 |
| LBP | 1.966584184 | -2.634877483 | 0.030292403 | 1.518666279 |
| CD44 | 6.464818359 | -2.63595768 | 7.71E-06 | 5.112754266 |
| CST1 | 2.011227761 | -2.642503918 | 0.027960861 | 1.553449462 |
| FFAR1 | 5.552334186 | -2.642996242 | 4.07E-05 | 4.389881779 |
| SLC2A14 | 9.342799907 | -2.648645466 | 3.95E-08 | 7.403862017 |
| BDKRB2 | 10.30890411 | -2.653392479 | 7.23E-09 | 8.140937517 |
| DEPDC1 | 12.03151026 | -2.658459163 | 4.01E-10 | 9.396399026 |
| TMPRSS6 | 7.644546594 | -2.665179804 | 8.94E-07 | 6.048450479 |
| NLRP12 | 9.190003526 | -2.667891188 | 5.11E-08 | 7.291408022 |
| GALR2 | 6.624511526 | -2.670083645 | 5.82E-06 | 5.234860446 |
| PIGR | 7.244928264 | -2.671350101 | 1.90E-06 | 5.722191888 |
| HOXA7 | 3.816856718 | -2.671479439 | 0.000990912 | 3.003964989 |
| NAA11 | 8.944864012 | -2.672060277 | 8.05E-08 | 7.094276727 |
| MIXL1 | 9.718973135 | -2.677036962 | 1.97E-08 | 7.705384934 |
| PTX3 | 2.237346008 | -2.685286281 | 0.01851759 | 1.732415531 |
| SRPX2 | 6.748964563 | -2.686118843 | 4.62E-06 | 5.334926673 |
| KCNK5 | 5.930859237 | -2.690487155 | 2.07E-05 | 4.685055708 |
| SH2D4A | 8.78976584 | -2.692951096 | 1.05E-07 | 6.978781904 |
| C9orf84 | 6.280695508 | -2.694210541 | 1.08E-05 | 4.966357642 |
| LYZ | 9.157216311 | -2.696103607 | 5.40E-08 | 7.267986143 |
| PTGDR | 7.064988229 | -2.699034133 | 2.62E-06 | 5.580914194 |
| FAM83A | 6.063970487 | -2.701426278 | 1.63E-05 | 4.788447973 |
| LAD1 | 5.669083028 | -2.705576076 | 3.33E-05 | 4.477731189 |
| ATP6V0A4 | 2.59922777 | -2.715775136 | 0.009514364 | 2.021620221 |
| APOL4 | 6.068887415 | -2.716177136 | 1.61E-05 | 4.793078248 |
| SPP1 | 5.510465945 | -2.719301811 | 4.41E-05 | 4.35532246 |
| RAET1K | 4.975236568 | -2.72344991 | 0.000118212 | 3.927338081 |
| OR2C1 | 9.175523924 | -2.728362765 | 5.25E-08 | 7.279666299 |
| GYLTL1B | 7.772024236 | -2.730454357 | 7.05E-07 | 6.15155399 |
| CCDC19 | 3.174866375 | -2.731616445 | 0.003270763 | 2.485350936 |
| INHBE | 7.669928096 | -2.740297455 | 8.56E-07 | 6.067709135 |
| CYP4A11 | 5.297208175 | -2.740556165 | 6.56E-05 | 4.183054054 |
| RBMS2P1 | 7.136039697 | -2.74109784 | 2.31E-06 | 5.635663172 |
| FABP5P7 | 5.133099915 | -2.741573785 | 8.81E-05 | 4.055128411 |
| GPX8 | 8.098383224 | -2.743070045 | 3.79E-07 | 6.420943873 |
| C4BPB | 6.127789439 | -2.746856526 | 1.44E-05 | 4.842268124 |
| ANKUB1 | 6.884324022 | -2.754039108 | 3.64E-06 | 5.438578706 |
| TP63 | 9.221225765 | -2.75525629 | 4.94E-08 | 7.306166806 |
| HES2 | 5.843372773 | -2.759301017 | 2.42E-05 | 4.616473017 |
| MYBPH | 1.727665224 | -2.778816267 | 0.04624949 | 1.334893053 |
| NKX2-5 | 3.113911285 | -2.782672051 | 0.003665408 | 2.435877635 |
| CCR2 | 10.34167128 | -2.785819698 | 6.75E-09 | 8.170627871 |
| STAC | 5.314018314 | -2.786352872 | 6.35E-05 | 4.197354972 |
| HLA-DQB2 | 3.855787277 | -2.787260934 | 0.0009214 | 3.035552001 |
| RP11-276H1.3 | 7.126296512 | -2.788660476 | 2.35E-06 | 5.628564639 |
| USH2A | 7.672466615 | -2.795306402 | 8.53E-07 | 6.068828037 |
| PDZD3 | 6.40560129 | -2.801820904 | 8.64E-06 | 5.06355049 |
| NR5A2 | 12.2956026 | -2.805602326 | 2.53E-10 | 9.597062378 |
| TREML2 | 11.41640724 | -2.813916096 | 1.04E-09 | 8.983328564 |
| NAMPTL | 5.844187726 | -2.820824636 | 2.42E-05 | 4.616473017 |
| C7orf34 | 7.960421312 | -2.821591914 | 4.97E-07 | 6.303285904 |
| ULBP3 | 8.930292904 | -2.82305865 | 8.11E-08 | 7.090993999 |
| THBS1 | 3.240213812 | -2.827087787 | 0.002895145 | 2.538329694 |
| TECTB | 7.565446309 | -2.829852208 | 1.04E-06 | 5.984089737 |
| C6orf25 | 11.20893716 | -2.829955116 | 1.50E-09 | 8.822535426 |
| HOXB4 | 3.251821286 | -2.832959984 | 0.002832301 | 2.547860519 |
| C9orf135 | 1.862614712 | -2.834202244 | 0.036369707 | 1.439260204 |
| C10orf112 | 8.809736879 | -2.835949694 | 1.02E-07 | 6.991995443 |
| AC092653.5 | 6.86180775 | -2.836005919 | 3.77E-06 | 5.423557822 |
| HSPD1P6 | 3.608934307 | -2.842659172 | 0.001450477 | 2.838489106 |
| GPR171 | 5.195754113 | -2.847314819 | 7.92E-05 | 4.10141322 |
| LRRC18 | 7.185843255 | -2.848875385 | 2.11E-06 | 5.676559029 |
| LRRC52 | 6.897171645 | -2.849371345 | 3.56E-06 | 5.448855271 |
| GP5 | 8.089891126 | -2.85122627 | 3.86E-07 | 6.413398744 |
| LIF | 3.936210391 | -2.859622667 | 0.000798436 | 3.097759842 |
| ZNF474 | 7.416045615 | -2.86310433 | 1.36E-06 | 5.866262864 |
| VDR | 8.110102738 | -2.863803529 | 3.71E-07 | 6.430358084 |
| TRIM63 | 11.46661028 | -2.871357488 | 9.81E-10 | 9.008218855 |
| TPRXL | 3.978242588 | -2.872003134 | 0.000740639 | 3.130393606 |
| MACC1 | 9.393392937 | -2.875870952 | 3.60E-08 | 7.443427537 |
| PAX9 | 6.37066028 | -2.887299867 | 9.21E-06 | 5.035514215 |
| SLC10A6 | 2.151543562 | -2.89226548 | 0.021664949 | 1.66424233 |
| RP11-216N14.7 | 4.736376338 | -2.898995201 | 0.000182923 | 3.73773181 |
| WISP1 | 4.853902714 | -2.899055414 | 0.000147143 | 3.832259415 |
| DSG2 | 3.322203885 | -2.902717794 | 0.00248056 | 2.605450188 |
| FAT2 | 2.97325451 | -2.903337742 | 0.004771505 | 2.321344662 |
| MYEOV | 8.127268307 | -2.914987474 | 3.60E-07 | 6.444186693 |
| MYPN | 7.207492086 | -2.917746307 | 2.02E-06 | 5.695450456 |
| C1orf110 | 8.993610525 | -2.919021468 | 7.38E-08 | 7.132081273 |
| ELF5 | 6.842537415 | -2.932225594 | 3.93E-06 | 5.405676046 |
| CA1 | 7.437877897 | -2.93615452 | 1.31E-06 | 5.881770356 |
| LUM | 2.955114009 | -2.938314946 | 0.004919704 | 2.30806101 |
| ZNF804B | 6.236757097 | -2.947611102 | 1.17E-05 | 4.930204143 |
| HS3ST3B1 | 4.197020153 | -2.958297511 | 0.000497111 | 3.30354637 |
| STAP1 | 5.848653539 | -2.962016192 | 2.41E-05 | 4.618746567 |
| PRSS48 | 9.422010463 | -2.97125189 | 3.43E-08 | 7.464083785 |
| IL13RA2 | 8.289113453 | -2.982433932 | 2.72E-07 | 6.565560628 |
| SIX6 | 3.639136093 | -2.98463923 | 0.001371769 | 2.862719138 |
| GPR20 | 7.762816122 | -2.989500561 | 7.21E-07 | 6.142348038 |
| FRRS1 | 11.42241589 | -2.989636775 | 1.04E-09 | 8.983328564 |
| POU4F1 | 2.251148141 | -3.001269662 | 0.018038592 | 1.743797365 |
| AIM1L | 7.140278632 | -3.001878836 | 2.30E-06 | 5.637665063 |
| TNFRSF9 | 12.64697257 | -3.002545865 | 1.47E-10 | 9.831644778 |
| IGF2BP2 | 5.465276587 | -3.008073933 | 4.80E-05 | 4.318715026 |
| SLC18A3 | 4.999051596 | -3.008580992 | 0.000112779 | 3.947771386 |
| AVPR1A | 8.571750933 | -3.008933184 | 1.59E-07 | 6.798444483 |
| FMO1 | 8.206395499 | -3.017269718 | 3.11E-07 | 6.50742251 |
| RASSF9 | 7.880744258 | -3.020648867 | 5.75E-07 | 6.240341856 |
| KLHL38 | 9.583418973 | -3.026010499 | 2.53E-08 | 7.597044862 |
| GPRC5A | 8.787821439 | -3.035365246 | 1.05E-07 | 6.977589024 |
| MEOX2 | 3.71916625 | -3.042108667 | 0.001180274 | 2.928017282 |
| CCR3 | 6.581045131 | -3.054532401 | 6.29E-06 | 5.201304491 |
| FEZF1 | 1.800528078 | -3.064171944 | 0.04062115 | 1.391247786 |
| MMP10 | 6.010652121 | -3.071183326 | 1.77E-05 | 4.751095771 |
| COL1A1 | 2.201510339 | -3.08873719 | 0.019787143 | 1.703616902 |
| GPR141 | 8.185978562 | -3.089006326 | 3.24E-07 | 6.489245066 |
| NLRP11 | 7.728344669 | -3.096415765 | 7.67E-07 | 6.115168683 |
| C6orf132 | 9.072149524 | -3.105222955 | 6.36E-08 | 7.196666409 |
| CXCL10 | 4.239522538 | -3.115120104 | 0.000459638 | 3.337583772 |
| AGTR1 | 9.822067108 | -3.118929963 | 1.63E-08 | 7.787965019 |
| FBXO39 | 10.11921604 | -3.122185711 | 9.95E-09 | 8.001983708 |
| COL6A6 | 8.488928682 | -3.124649957 | 1.85E-07 | 6.733328522 |
| WASF4P | 7.685329059 | -3.127430048 | 8.29E-07 | 6.081504077 |
| CCKAR | 8.151419309 | -3.129018254 | 3.45E-07 | 6.462574199 |
| AC016582.2 | 9.465448341 | -3.13018814 | 3.15E-08 | 7.501270413 |
| HOXA5 | 5.097751289 | -3.135436875 | 9.37E-05 | 4.028404924 |
| KLRC1 | 5.035502366 | -3.13595939 | 0.000105677 | 3.976020886 |
| PLEKHS1 | 2.752003425 | -3.138614845 | 0.007123892 | 2.1472827 |
| DIO1 | 4.735367027 | -3.141063497 | 0.000183826 | 3.735593592 |
| SERPINA3 | 6.970076598 | -3.142561369 | 3.16E-06 | 5.500256494 |
| RIPPLY3 | 7.806358638 | -3.147060564 | 6.55E-07 | 6.183443135 |
| MMP7 | 2.680668242 | -3.152231679 | 0.008133629 | 2.089715636 |
| LOX | 2.218380601 | -3.168099858 | 0.019185841 | 1.717019162 |
| ACTG2 | 3.078385756 | -3.174938914 | 0.003902456 | 2.408661947 |
| CPA1 | 6.030411673 | -3.184719106 | 1.71E-05 | 4.766533925 |
| TRPC7 | 10.41998548 | -3.186664905 | 6.01E-09 | 8.220826948 |
| OR7C1 | 8.908893354 | -3.18951824 | 8.40E-08 | 7.075568983 |
| LRRIQ4 | 7.418829384 | -3.190972481 | 1.36E-06 | 5.86804558 |
| ESPNL | 8.052738291 | -3.196660972 | 4.15E-07 | 6.382031712 |
| AC116050.1 | 7.956008094 | -3.199190721 | 5.01E-07 | 6.300388415 |
| TNFRSF11B | 9.668055508 | -3.212839692 | 2.15E-08 | 7.667744439 |
| LTF | 1.907887592 | -3.212928266 | 0.033527332 | 1.474601008 |
| HOXA4 | 4.42238653 | -3.213934595 | 0.000327658 | 3.484579876 |
| POSTN | 2.342951196 | -3.215184666 | 0.015295773 | 1.815428559 |
| CD300E | 10.05632428 | -3.219672147 | 1.10E-08 | 7.95691173 |
| ZYG11A | 7.863665274 | -3.223489278 | 5.94E-07 | 6.226182842 |
| CHRNB4 | 4.595744592 | -3.233281633 | 0.000238456 | 3.622591465 |
| IFIT1B | 5.417414722 | -3.235358069 | 5.24E-05 | 4.280502026 |
| GCSAM | 7.568463082 | -3.237797114 | 1.04E-06 | 5.984670733 |
| AC027612.4 | 4.892305767 | -3.247257444 | 0.000136725 | 3.864151085 |
| GCNT7 | 4.733728869 | -3.249666967 | 0.000184631 | 3.733696358 |
| LGALS17A | 3.291322568 | -3.250324212 | 0.002633039 | 2.579542719 |
| PITX1 | 6.698020362 | -3.273276013 | 5.08E-06 | 5.294300901 |
| LBX1-AS1 | 8.252094446 | -3.28932244 | 2.87E-07 | 6.541442995 |
| HOXA3 | 5.439609685 | -3.301098867 | 5.02E-05 | 4.299193211 |
| FCRL1 | 3.472106626 | -3.329026786 | 0.001876814 | 2.72657886 |
| MUSK | 5.108219766 | -3.348178919 | 9.18E-05 | 4.036987381 |
| MYOCD | 9.780485965 | -3.353274332 | 1.76E-08 | 7.754174241 |
| FSD2 | 6.931882513 | -3.361503818 | 3.35E-06 | 5.474756965 |
| TULP1 | 7.485787849 | -3.386241104 | 1.21E-06 | 5.918688775 |
| RSPH6A | 7.069336815 | -3.387913635 | 2.60E-06 | 5.584780088 |
| DDC8 | 8.67707478 | -3.391221627 | 1.31E-07 | 6.882083587 |
| OR8S1 | 7.226258365 | -3.40306171 | 1.94E-06 | 5.711818986 |
| RP1L1 | 8.782800005 | -3.4122333 | 1.06E-07 | 6.97376737 |
| PDPN | 5.886603145 | -3.432400459 | 2.24E-05 | 4.649667541 |
| IKZF3 | 14.88640434 | -3.438978555 | 2.74E-12 | 11.56172846 |
| SOX30 | 9.300451031 | -3.439430976 | 4.25E-08 | 7.371839591 |
| GPR1 | 5.487213758 | -3.455889398 | 4.62E-05 | 4.335316497 |
| SLC4A1 | 7.717823566 | -3.457927903 | 7.79E-07 | 6.108373923 |
| SLC12A3 | 4.870142403 | -3.479588102 | 0.000143076 | 3.844433535 |
| HRH4 | 5.136496358 | -3.481500042 | 8.76E-05 | 4.057587353 |
| HMGA2 | 5.173760791 | -3.49566111 | 8.26E-05 | 4.083157134 |
| MAB21L2 | 2.700487235 | -3.507595546 | 0.007862802 | 2.104422638 |
| EVX2 | 4.606604798 | -3.512278047 | 0.000233152 | 3.632360322 |
| P2RY4 | 7.757735959 | -3.514104012 | 7.27E-07 | 6.13830745 |
| IDO1 | 4.83435572 | -3.516676727 | 0.000151853 | 3.818577216 |
| APCDD1L | 2.308885136 | -3.519705277 | 0.016261182 | 1.788847884 |
| SCNN1B | 6.816154992 | -3.536577604 | 4.09E-06 | 5.388607468 |
| EN1 | 2.553004029 | -3.540021071 | 0.010355408 | 1.984832771 |
| IGF2BP3 | 8.850660259 | -3.541097204 | 9.40E-08 | 7.027055046 |
| OR51E1 | 4.310575977 | -3.54283343 | 0.000402911 | 3.394791369 |
| COL4A1 | 5.270375081 | -3.56466355 | 6.92E-05 | 4.15965776 |
| MAP1LC3C | 4.458501809 | -3.57344164 | 0.000306835 | 3.513095753 |
| GJA3 | 5.054488114 | -3.583149555 | 0.000101829 | 3.992126616 |
| FUT6 | 7.921231567 | -3.584530446 | 5.31E-07 | 6.274705345 |
| PRND | 9.715771121 | -3.596651778 | 1.97E-08 | 7.705384934 |
| HAND2 | 6.415439948 | -3.597973589 | 8.48E-06 | 5.071596525 |
| AC023632.1 | 6.907945753 | -3.621364275 | 3.48E-06 | 5.457954309 |
| CACNG5 | 6.987526 | -3.625161744 | 3.07E-06 | 5.512731506 |
| STC1 | 6.134466425 | -3.633533666 | 1.42E-05 | 4.846959314 |
| H19 | 1.932924892 | -3.635295934 | 0.032088848 | 1.493645874 |
| GALNT5 | 3.103663305 | -3.649610713 | 0.003737922 | 2.427369797 |
| LRRC53 | 7.890823115 | -3.671407998 | 5.65E-07 | 6.248329318 |
| TRPM8 | 4.174460133 | -3.676223322 | 0.00051712 | 3.286408337 |
| ATP6V0D2 | 7.997087662 | -3.696013832 | 4.66E-07 | 6.332005141 |
| NTS | 2.154907503 | -3.701305074 | 0.021525633 | 1.667044067 |
| HOXA6 | 7.265857547 | -3.702780376 | 1.83E-06 | 5.737938407 |
| RP11-89N17.1 | 3.329052024 | -3.721963273 | 0.002449816 | 2.610866455 |
| COL3A1 | 3.054532521 | -3.740753266 | 0.004088396 | 2.388446999 |
| SPATA32 | 8.527859313 | -3.746384226 | 1.74E-07 | 6.76055621 |
| CD80 | 14.11411865 | -3.757388182 | 1.09E-11 | 10.96201329 |
| DCAF4L2 | 8.62621339 | -3.76353541 | 1.44E-07 | 6.841277684 |
| CD5L | 9.56517807 | -3.772887305 | 2.60E-08 | 7.585713471 |
| PADI1 | 6.99107518 | -3.797250081 | 3.05E-06 | 5.516286242 |
| GPR182 | 8.180154544 | -3.804075052 | 3.27E-07 | 6.485084137 |
| APOF | 8.257899321 | -3.811494789 | 2.84E-07 | 6.546516587 |
| HIST1H1B | 9.396982524 | -3.812345592 | 3.59E-08 | 7.444620787 |
| LMOD2 | 6.117436154 | -3.822759615 | 1.46E-05 | 4.834539955 |
| CHRNA9 | 5.356456694 | -3.834502016 | 5.90E-05 | 4.229346472 |
| SERPINE1 | 5.630731191 | -3.837575341 | 3.56E-05 | 4.448775879 |
| RBM46 | 8.864533297 | -3.863216056 | 9.16E-08 | 7.038027071 |
| DMP1 | 5.625051802 | -3.867153734 | 3.60E-05 | 4.444285281 |
| POU4F3 | 8.248322202 | -3.876146828 | 2.89E-07 | 6.53875476 |
| HOXC6 | 7.164145279 | -3.88608555 | 2.19E-06 | 5.65879342 |
| RP11-366L20.2 | 2.907959371 | -3.895864306 | 0.005369467 | 2.270068845 |
| VGLL2 | 4.534941473 | -3.908077822 | 0.000266362 | 3.574527172 |
| ASB11 | 10.96380979 | -3.912396828 | 2.35E-09 | 8.628485473 |
| GATA4 | 4.658402522 | -3.943338563 | 0.000212741 | 3.672148101 |
| FCAMR | 7.791945997 | -3.957420812 | 6.75E-07 | 6.170701624 |
| PCDHB1 | 9.762652872 | -3.978364945 | 1.83E-08 | 7.7386557 |
| MMP3 | 3.740971538 | -3.982099866 | 0.001134303 | 2.945270748 |
| BTN1A1 | 8.935575083 | -3.985636752 | 8.11E-08 | 7.090993999 |
| FOXA1 | 5.154779531 | -3.985922182 | 8.52E-05 | 4.069455857 |
| DMBX1 | 6.616607722 | -3.988487683 | 5.90E-06 | 5.22915139 |
| COL8A1 | 3.729655837 | -4.024937176 | 0.00115776 | 2.936381357 |
| C8orf22 | 2.307006496 | -4.030045144 | 0.016314608 | 1.787423365 |
| OIT3 | 6.97340351 | -4.049439395 | 3.14E-06 | 5.502981463 |
| MYOC | 7.564723533 | -4.090054953 | 1.04E-06 | 5.984089737 |
| CLDN14 | 9.755165923 | -4.091349265 | 1.85E-08 | 7.733595205 |
| IL2RA | 7.922315405 | -4.139054282 | 5.31E-07 | 6.274705345 |
| ESM1 | 4.448694593 | -4.140861549 | 0.000312871 | 3.504634067 |
| NT5C1B | 9.59586083 | -4.154273759 | 2.47E-08 | 7.606630193 |
| AOC1 | 6.827096404 | -4.169544813 | 4.00E-06 | 5.397662444 |
| A4GNT | 9.903704274 | -4.175089188 | 1.41E-08 | 7.849828567 |
| HAO2 | 8.080828254 | -4.193654559 | 3.92E-07 | 6.406577259 |
| TGM4 | 6.414772169 | -4.204130892 | 8.49E-06 | 5.07097172 |
| C2orf91 | 9.927724938 | -4.234788364 | 1.37E-08 | 7.864391139 |
| CCDC168 | 5.858403043 | -4.242298507 | 2.37E-05 | 4.626078693 |
| C17orf47 | 7.141696138 | -4.302090791 | 2.30E-06 | 5.638138361 |
| ALPK2 | 11.22930361 | -4.309799851 | 1.49E-09 | 8.82563855 |
| HOXC8 | 5.589262344 | -4.365791435 | 3.81E-05 | 4.419045305 |
| HOXA2 | 5.951709269 | -4.377818821 | 1.99E-05 | 4.701188981 |
| OTP | 3.697039527 | -4.393706633 | 0.001232339 | 2.90926977 |
| CHI3L1 | 3.163905363 | -4.439199776 | 0.003333752 | 2.477066658 |
| CHST4 | 7.597930217 | -4.458376978 | 9.77E-07 | 6.010224838 |
| HOXC9 | 5.317484435 | -4.465660513 | 6.32E-05 | 4.199452515 |
| BNC1 | 8.919086321 | -4.471594299 | 8.26E-08 | 7.083157134 |
| HOXC10 | 4.230724768 | -4.474861437 | 0.000466275 | 3.33135749 |
| CPA3 | 4.568777116 | -4.650536829 | 0.000250383 | 3.601395487 |
| PNPLA1 | 9.733316471 | -4.653304164 | 1.93E-08 | 7.714328958 |
| SCN4A | 8.72164307 | -4.690863783 | 1.20E-07 | 6.921242193 |
| RP11-124N14.3 | 16.92406696 | -4.738338688 | 1.13E-13 | 12.94691233 |
| PITX2 | 3.286648025 | -4.7606461 | 0.002655771 | 2.575809345 |
| CCR9 | 6.519877542 | -4.784936472 | 6.99E-06 | 5.155236208 |
| CCDC129 | 2.118005939 | -4.788206388 | 0.023009868 | 1.638085876 |
| KRT75 | 5.769337348 | -4.797067972 | 2.77E-05 | 4.556933357 |
| LRRC15 | 4.802181432 | -4.897066291 | 0.000162553 | 3.789003908 |
| OR2B6 | 4.848905938 | -4.918490072 | 0.000148342 | 3.828734833 |
| P2RY10 | 7.241670653 | -4.918602518 | 1.90E-06 | 5.722186569 |
| MMP12 | 3.162452927 | -4.984647297 | 0.003338079 | 2.476503345 |
| HOXD11 | 5.657815311 | -5.134013064 | 3.39E-05 | 4.46926467 |
| HOXD10 | 3.341464849 | -5.275519174 | 0.002391979 | 2.62124271 |
| RP4-794H19.4 | 4.907353401 | -5.463807834 | 0.000133731 | 3.873766969 |
| HOXD13 | 3.676867203 | -5.534743903 | 0.001277722 | 2.893563622 |
| RP11-189B4.6 | 3.473852954 | -5.632241487 | 0.00187162 | 2.727782239 |
| PAX3 | 1.930836825 | -5.690244292 | 0.032205731 | 1.492066843 |
| RP11-300M24.1 | 2.826735606 | -5.743718911 | 0.006218011 | 2.206348525 |
| HOXC11 | 6.799787776 | -5.885146514 | 4.19E-06 | 5.377967439 |
| IBSP | 2.425242153 | -6.195807829 | 0.013169513 | 1.880430292 |
| HOXC13 | 2.90775246 | -6.199514754 | 0.005370797 | 2.269961272 |
